# Supplementary material for: Motivation and Continuance Intention towards Online Instruction among Teachers during the COVID-19 Pandemic: The Mediating Effect of Burnout and Technostress
Source: Int J Environ Res Public Health. 2020 Oct 30;17(21):8002. doi: 10.3390/ijerph17218002 (PMC7672544; doi:10.3390/ijerph17218002)
Supplement: Supplementary file 1 [file ijerph-17-08002-s001.xls]

## Sheet: In-service teachers
Time	Teacher_number	Prepostemergency	WDM7	WDM4	WDM3	WDM9	BN3	WDM8	WDM2	SE2	WDM5	SE4	SE9	SE10	BN1	PT7	WDM6	PT6	BN4	BN5	SE1	SE6	SE8	SE5	SE7	SE3	PT1	PT4	PT5	PT8	PT9	WDM1	CI1	CI4	CI5	CI2	PT2	PT3	Working stage	Gender	Age	School settings	Occupancy
2020-04-12 15:30:23	436	1	6	6	6	6	3	2	3	2	2	3	2	2	3	4	5	5	4	5	4	7	6	6	7	6	6	7	7	7	6	7	5	6	6	6	7	6	early-stage	Female	20	Rural	fixed duration
2020-04-04 18:24:23	13	1	5	7	3	6	7	6	1	7	1	7	7	7	7	7	1	1	1	1	7	7	7	7	7	7	7	2	1	2	7	1	5	7	6	7	7	7	early-stage	Female	22	Rural	fixed duration
2020-04-04 18:39:19	23	1	6	3	5	6	7	7	7	6	6	7	7	7	2	7	6	1	7	7	7	7	7	7	7	6	5	5	4	1	2	1	6	7	7	6	6	1	early-stage	Female	28	Rural	fixed duration
2020-04-05 10:35:31	174	1	6	6	6	6	6	5	6	6	6	6	6	6	5	5	3	3	3	6	6	6	6	6	6	6	2	2	2	2	6	2	6	6	6	6	2	2	early-stage	Female	37	Rural	fixed duration
2020-04-11 21:45:14	425	1	2	5	4	5	7	7	6	5	5	4	4	3	5	4	1	2	2	2	7	6	7	7	7	7	6	3	3	1	1	5	6	5	6	6	3	1	early-stage	Female	27	Rural	fixed duration
2020-04-06 12:45:19	287	1	5	6	5	5	5	5	5	5	5	3	5	5	6	5	5	5	3	5	6	5	3	5	5	5	5	6	6	5	5	5	5	5	5	5	3	5	early-stage	Female	33	Rural	fixed duration
2020-04-06 09:35:29	272	1	6	6	5	5	4	5	4	5	3	5	6	6	3	4	2	2	2	4	6	6	4	5	6	6	4	4	4	4	5	2	5	5	5	5	2	3	early-stage	Female	25	Rural	fixed duration
2020-04-06 12:28:04	286	1	5	6	4	6	6	6	5	5	5	5	5	5	6	4	4	4	4	5	6	5	4	5	6	6	5	5	5	4	5	4	4	5	4	4	4	4	early-stage	Female	29	Rural	fixed duration
2020-04-10 10:18:13	377	1	5	6	4	5	4	6	6	5	4	6	6	5	6	5	6	4	4	5	6	6	6	5	5	5	4	3	3	4	3	3	4	4	4	4	4	4	early-stage	Female	22	Rural	fixed duration
2020-04-04 19:14:37	42	1	5	6	6	7	5	6	5	6	3	7	7	7	5	3	3	6	4	5	7	7	7	7	7	7	6	5	7	5	5	5	6	6	6	7	4	6	early-stage	Female	30	Rural	fixed duration
2020-04-06 12:22:30	280	1	5	4	5	3	6	6	4	6	3	5	5	4	5	3	3	4	3	1	5	5	5	5	5	5	5	6	4	5	4	5	2	2	3	4	5	5	early-stage	Female	35	Rural	fixed duration
2020-04-05 00:42:25	100	1	4	5	3	3	4	2	3	3	2	3	3	4	3	4	5	4	4	5	5	4	4	5	4	4	4	5	4	5	4	5	3	2	3	4	1	3	early-stage	Female	27	Rural	fixed duration
2020-04-06 12:24:23	284	1	6	6	5	5	6	5	5	3	2	4	6	2	6	6	6	4	6	6	4	5	5	5	5	4	6	6	6	6	6	6	4	6	2	2	6	6	early-stage	Female	37	Rural	fixed duration
2020-04-04 18:58:58	35	1	3	2	2	2	6	2	2	7	2	7	7	4	6	6	1	2	2	7	6	2	5	1	7	7	6	5	5	4	5	6	3	6	5	4	6	4	early-stage	Female	38	Rural	fixed duration
2020-04-04 18:10:04	7	1	1	1	1	1	7	2	7	6	1	2	2	3	5	7	7	7	7	7	6	5	6	7	7	7	7	7	7	7	7	7	1	1	1	1	7	7	early-stage	Female	22	Rural	fixed duration
2020-04-24 21:58:41	948	2	7	7	7	7	7	7	7	7	7	7	7	7	7	7	7	7	7	7	7	7	7	7	7	7	7	7	7	7	7	7	7	7	7	7	7	7	early-stage	Female	28	Rural	fixed duration
2020-04-24 22:00:01	949	2	6	6	5	5	4	6	6	7	6	7	6	7	3	3	6	4	3	3	6	6	6	7	7	7	3	2	2	2	2	5	6	6	7	6	1	1	early-stage	Female	20	Rural	fixed duration
2020-05-05 14:03:43	1100	2	5	5	3	3	5	5	3	5	3	4	5	5	5	3	5	3	3	5	5	5	5	5	6	5	5	4	4	4	5	4	3	5	5	5	5	5	early-stage	Female	26	Rural	fixed duration
2020-04-11 21:58:26	428	1	3	3	2	3	1	3	3	3	2	2	3	3	2	2	3	3	4	4	3	3	4	4	4	4	3	2	3	4	4	4	1	3	2	2	3	3	definitive	Female	29	Rural	fixed duration
2020-04-06 20:31:55	294	1	6	5	5	5	6	2	6	7	6	6	6	6	3	7	6	2	5	6	7	5	6	6	7	6	2	1	2	2	4	3	6	6	6	6	3	2	definitive	Female	32	Rural	fixed duration
2020-04-04 22:35:16	83	1	5	5	3	3	4	3	3	5	4	5	5	5	3	1	1	2	1	2	2	3	4	5	5	5	1	1	1	1	1	3	3	3	4	4	2	1	definitive	Female	29	Rural	fixed duration
2020-04-05 13:26:31	217	1	4	5	4	3	6	5	5	4	4	5	5	4	6	3	1	6	2	7	7	3	2	6	7	6	7	7	7	7	7	1	5	4	4	4	4	7	definitive	Female	28	Rural	fixed duration
2020-04-06 12:19:56	278	1	5	4	4	4	6	5	3	5	3	7	5	6	7	2	1	2	3	7	5	5	3	2	2	1	5	3	3	5	5	1	5	3	3	3	6	7	definitive	Female	21	Rural	fixed duration
2020-04-17 09:28:51	710	2	7	6	6	5	6	7	6	7	7	4	7	6	2	5	6	1	1	6	6	7	7	4	7	7	1	1	2	2	1	2	7	6	7	7	2	2	definitive	Female	32	Rural	fixed duration
2020-05-06 11:26:31	1111	2	6	6	5	6	5	6	5	6	6	6	6	6	5	4	4	4	4	4	6	6	6	6	6	7	4	4	4	4	2	6	5	5	5	6	6	5	definitive	Female	43	Rural	fixed duration
2020-05-05 15:37:19	1105	2	4	3	3	3	6	4	3	6	3	5	5	4	7	5	5	4	6	7	5	6	6	6	6	4	4	4	4	6	5	7	5	3	3	3	4	5	definitive	Female	50	Rural	fixed duration
2020-04-28 01:43:25	1084	2	5	6	5	6	7	2	1	5	5	7	5	7	7	7	5	5	6	3	1	4	1	7	7	7	7	5	6	7	1	6	5	4	1	2	4	2	definitive	Female	21	Rural	fixed duration
2020-04-04 20:23:29	63	1	5	5	3	5	6	6	1	7	1	7	6	6	7	7	7	6	6	7	6	6	7	7	7	6	6	6	7	6	6	6	6	4	4	6	6	6	first-degree certificate	Female	46	Rural	fixed duration
2020-04-05 09:42:12	155	1	6	4	2	2	7	4	4	5	3	4	3	4	5	5	5	5	3	5	5	5	5	5	6	6	6	6	6	5	5	4	5	5	5	5	4	5	first-degree certificate	Female	44	Rural	fixed duration
2020-04-11 15:47:49	411	1	1	6	2	2	6	6	2	2	2	3	3	2	6	3	4	4	2	7	2	2	6	6	2	2	6	6	2	2	5	2	2	2	2	2	2	4	first-degree certificate	Female	48	Rural	fixed duration
2020-04-07 20:57:11	328	1	4	5	5	4	5	5	4	6	4	4	5	5	3	2	4	4	2	3	5	5	5	6	6	6	3	2	2	2	5	6	6	6	6	6	2	3	Ph.D. degree	Female	45	Rural	fixed duration
2020-04-10 13:06:20	387	1	7	4	5	6	1	6	7	7	5	7	7	7	1	1	4	4	1	1	7	7	7	7	7	7	1	2	1	4	7	4	6	4	5	6	1	1	early-stage	Male	30	Rural	fixed duration
2020-04-16 23:55:31	693	2	3	3	2	5	1	4	4	6	4	6	2	6	1	3	4	3	5	5	6	4	6	4	4	5	2	2	4	2	3	4	4	4	4	3	4	2	early-stage	Male	45	Rural	fixed duration
2020-04-07 16:06:52	313	1	6	7	6	6	5	6	7	7	7	7	7	7	1	1	7	2	1	1	7	7	7	6	7	6	1	1	1	1	1	2	7	7	7	7	1	2	early-stage	Female	32	Urban	fixed duration
2020-04-11 21:51:22	426	1	6	7	6	6	6	6	6	6	6	6	6	6	1	1	4	2	1	6	7	7	7	7	7	7	1	1	1	1	6	4	7	7	7	7	1	1	early-stage	Female	42	Urban	fixed duration
2020-04-12 20:39:36	439	1	3	6	6	6	4	5	6	5	5	7	7	7	4	1	2	1	1	1	7	6	6	6	7	6	1	1	6	1	2	6	1	6	4	3	1	1	early-stage	Female	22	Urban	fixed duration
2020-04-06 12:22:38	281	1	1	1	1	1	7	1	1	1	1	1	1	1	7	7	7	7	7	7	1	1	1	1	1	1	7	7	7	7	7	7	1	1	1	1	7	7	early-stage	Female	36	Urban	fixed duration
2020-04-04 19:26:11	46	1	7	7	7	7	3	7	6	6	6	6	7	7	1	1	1	2	1	2	7	7	7	7	7	7	3	4	3	1	2	2	6	6	6	7	2	2	early-stage	Female	32	Urban	fixed duration
2020-04-14 12:13:32	478	1	4	5	5	6	1	6	5	5	5	6	6	6	5	5	5	5	5	6	6	7	5	6	7	7	6	6	6	5	6	5	5	6	6	6	5	5	early-stage	Female	37	Urban	fixed duration
2020-04-11 21:12:25	422	1	3	5	5	3	5	5	3	5	3	6	6	6	5	3	5	4	1	1	3	3	3	3	5	6	3	1	5	6	3	5	7	6	5	7	2	3	early-stage	Female	31	Urban	fixed duration
2020-04-11 21:11:12	421	1	7	6	5	6	5	7	6	6	6	6	6	6	4	2	1	2	1	5	5	6	6	6	7	7	5	5	4	5	5	4	5	5	5	5	4	4	early-stage	Female	21	Urban	fixed duration
2020-04-10 09:09:45	372	1	6	6	4	5	6	5	6	7	5	7	7	7	5	1	1	2	2	5	6	5	6	7	7	7	1	1	2	3	2	1	7	2	5	6	2	2	early-stage	Female	22	Urban	fixed duration
2020-04-10 09:21:43	373	1	6	6	4	5	6	5	6	7	5	7	7	7	5	1	1	2	2	5	6	5	6	7	7	7	1	1	2	3	2	1	7	2	5	6	2	2	early-stage	Female	22	Urban	fixed duration
2020-04-04 19:34:10	51	1	7	7	6	6	6	6	5	6	5	5	6	6	7	7	6	5	5	6	6	6	6	6	6	6	5	5	5	5	5	6	6	6	6	6	5	6	early-stage	Female	34	Urban	fixed duration
2020-04-11 21:14:55	423	1	5	7	6	7	7	7	4	6	5	7	7	7	1	3	1	1	1	5	7	7	7	7	7	7	1	1	3	2	2	4	7	7	7	7	5	1	early-stage	Female	32	Urban	fixed duration
2020-04-05 01:17:22	106	1	5	5	4	4	5	4	4	5	4	5	5	4	5	5	4	3	6	7	4	3	2	3	5	5	5	4	4	4	3	4	2	5	3	3	3	4	early-stage	Female	35	Urban	fixed duration
2020-04-04 18:40:56	25	1	6	6	6	6	4	7	6	6	6	6	6	6	5	4	3	2	3	4	7	6	6	6	6	7	4	4	4	4	4	4	6	6	6	6	4	4	early-stage	Female	21	Urban	fixed duration
2020-04-05 10:53:05	179	1	5	5	5	4	5	5	5	5	5	5	5	5	5	5	4	5	3	5	5	5	6	6	6	5	5	5	5	4	4	2	4	4	4	4	4	4	early-stage	Female	43	Urban	fixed duration
2020-04-10 10:11:58	374	1	4	5	4	5	4	5	5	4	5	4	5	4	3	3	4	5	3	4	5	3	4	5	3	4	3	4	5	4	4	4	4	4	4	4	4	4	early-stage	Female	22	Urban	fixed duration
2020-04-04 19:36:05	53	1	3	6	3	3	2	7	4	6	5	4	5	4	5	7	1	2	4	4	7	5	7	7	7	7	7	7	7	7	7	7	3	4	4	6	7	7	early-stage	Female	21	Urban	fixed duration
2020-04-04 18:35:08	21	1	1	1	2	1	1	1	2	1	2	1	1	1	2	5	4	5	5	5	4	4	4	4	4	4	5	4	5	5	5	4	4	4	4	4	5	5	early-stage	Female	26	Urban	fixed duration
2020-04-04 21:02:53	69	1	6	7	7	7	3	5	5	6	6	7	6	5	5	5	7	2	1	4	5	7	7	7	7	6	2	1	3	3	3	3	7	6	6	6	4	2	early-stage	Female	29	Urban	fixed duration
2020-04-07 16:00:56	311	1	4	5	5	4	6	4	3	5	5	5	4	4	6	7	5	3	4	7	2	5	4	4	6	4	7	3	6	7	3	5	3	3	3	4	5	7	early-stage	Female	22	Urban	fixed duration
2020-04-04 18:06:16	2	1	3	5	3	3	6	3	3	6	3	3	3	6	7	6	6	6	6	7	7	6	3	3	6	6	6	6	7	6	7	6	3	3	3	6	6	6	early-stage	Female	36	Urban	fixed duration
2020-04-04 19:08:07	39	1	7	5	7	7	1	5	2	7	1	7	7	5	7	2	7	1	1	7	7	5	7	7	7	7	1	1	2	2	1	7	3	1	2	2	1	3	early-stage	Female	25	Urban	fixed duration
2020-04-07 20:54:23	327	1	5	4	5	3	7	4	3	4	4	5	5	5	7	1	4	4	3	5	7	6	1	5	7	6	5	1	5	4	1	1	5	3	5	4	4	5	early-stage	Female	23	Urban	fixed duration
2020-04-04 22:29:03	82	1	6	5	4	4	7	6	3	5	2	7	2	7	7	1	1	4	1	7	6	7	7	5	7	7	7	7	7	7	5	7	1	2	1	1	2	2	early-stage	Female	34	Urban	fixed duration
2020-04-05 21:46:39	256	1	1	7	3	7	7	5	5	5	5	5	7	5	5	1	7	7	7	5	5	5	1	7	7	7	7	7	7	7	3	1	6	7	7	7	7	7	early-stage	Female	46	Urban	fixed duration
2020-04-10 10:44:24	382	1	1	2	3	1	1	3	3	1	3	1	1	1	3	3	3	3	3	3	1	1	1	1	1	1	3	3	3	3	3	3	3	3	3	3	3	3	early-stage	Female	21	Urban	fixed duration
2020-04-06 12:20:18	279	1	1	1	1	1	1	1	1	1	1	1	1	1	2	2	2	2	2	2	1	1	1	1	1	1	2	2	2	2	2	2	1	1	1	1	2	2	early-stage	Female	33	Urban	fixed duration
2020-04-24 22:28:57	957	2	7	7	7	7	1	7	7	7	7	7	7	7	1	1	1	1	1	1	7	7	7	7	7	7	1	1	1	7	1	1	7	7	7	7	1	1	early-stage	Female	20	Urban	fixed duration
2020-04-16 20:21:43	597	2	7	7	5	6	6	7	7	7	7	7	7	7	6	4	1	2	4	5	7	7	6	7	7	7	6	1	3	4	2	1	7	6	6	7	1	1	early-stage	Female	32	Urban	fixed duration
2020-04-17 01:42:27	696	2	7	7	7	7	5	6	7	7	7	7	7	6	2	1	4	1	1	1	7	7	7	6	7	6	1	1	3	1	7	1	7	7	7	7	2	2	early-stage	Female	45	Urban	fixed duration
2020-04-22 12:05:49	875	2	6	6	5	6	6	7	7	6	6	4	6	5	4	4	4	3	1	1	7	7	6	3	7	6	3	5	5	5	6	7	6	7	7	7	6	4	early-stage	Female	45	Urban	fixed duration
2020-04-23 21:13:49	921	2	6	7	6	6	6	6	6	6	6	6	6	6	1	1	4	2	1	6	7	7	7	7	7	7	1	1	1	1	6	4	7	7	7	7	1	1	early-stage	Female	42	Urban	fixed duration
2020-04-24 22:59:08	971	2	6	6	2	2	7	6	2	7	2	7	2	2	7	7	7	2	6	7	7	7	7	7	7	7	7	7	7	7	7	7	2	2	2	7	7	7	early-stage	Female	23	Urban	fixed duration
2020-04-16 19:04:33	560	2	6	6	5	6	6	7	5	7	6	7	7	7	5	3	1	3	5	6	7	6	6	6	7	6	5	6	6	5	4	6	2	1	2	1	2	3	early-stage	Female	25	Urban	fixed duration
2020-04-25 13:44:11	1016	2	6	6	6	5	1	6	5	7	6	6	6	5	1	3	2	6	1	1	6	7	4	6	7	5	5	1	1	4	5	3	5	4	5	4	1	1	early-stage	Female	31	Urban	fixed duration
2020-04-16 21:31:10	644	2	6	6	6	6	2	6	6	6	6	5	5	5	5	2	5	2	2	2	5	5	5	5	5	5	2	2	2	2	2	5	5	5	5	5	2	2	early-stage	Female	26	Urban	fixed duration
2020-04-25 11:51:05	1008	2	4	6	5	7	5	4	6	6	5	6	6	5	4	5	6	6	3	2	6	6	4	5	5	4	3	5	6	1	2	6	5	5	6	5	5	5	early-stage	Female	35	Urban	fixed duration
2020-04-25 12:36:33	1012	2	5	5	5	5	2	2	5	6	5	5	6	3	2	1	5	2	2	5	7	5	5	6	7	5	5	2	5	5	5	1	5	5	5	5	5	5	early-stage	Female	26	Urban	fixed duration
2020-04-24 21:07:10	932	2	6	6	4	5	4	6	5	6	4	5	5	5	4	6	5	5	4	5	6	6	7	7	7	6	5	4	6	5	4	7	7	7	7	7	3	4	early-stage	Female	48	Urban	fixed duration
2020-04-27 07:01:55	1074	2	5	7	4	7	6	6	4	5	3	6	6	5	6	4	6	6	6	5	5	6	3	4	7	7	7	6	7	6	6	5	7	7	7	7	6	7	early-stage	Female	41	Urban	fixed duration
2020-04-24 21:33:24	942	2	7	5	5	5	7	5	5	7	2	6	6	6	6	4	6	6	4	7	7	5	6	6	4	5	6	4	7	4	5	2	5	3	3	3	4	4	early-stage	Female	45	Urban	fixed duration
2020-04-20 09:59:43	778	2	6	6	4	6	5	4	6	4	1	7	7	7	6	1	7	3	3	5	6	6	7	6	7	7	5	1	1	1	1	6	5	5	6	6	2	1	early-stage	Female	24	Urban	fixed duration
2020-04-16 20:23:53	599	2	6	7	5	5	7	6	1	6	1	7	7	6	1	4	7	1	4	7	7	7	7	7	7	7	3	1	1	2	2	7	6	3	5	6	3	2	early-stage	Female	23	Urban	fixed duration
2020-04-16 22:42:58	675	2	3	1	1	1	6	6	1	6	1	5	3	2	7	5	6	6	7	7	6	3	5	5	6	6	6	3	6	7	7	7	5	2	2	3	2	7	early-stage	Female	23	Urban	fixed duration
2020-04-17 10:53:06	730	2	3	5	2	6	6	3	4	3	2	2	2	4	7	6	1	6	5	7	7	4	7	7	5	4	7	5	4	5	7	1	6	5	4	4	5	5	early-stage	Female	24	Urban	fixed duration
2020-04-24 22:07:07	953	2	7	5	5	5	7	7	7	7	5	6	6	5	6	5	7	6	6	5	7	6	5	5	7	7	5	6	6	5	5	7	3	7	6	7	5	2	early-stage	Female	21	Urban	fixed duration
2020-04-25 13:21:01	1013	2	4	3	3	3	5	3	4	5	3	4	3	3	5	4	5	5	5	6	6	4	4	6	6	6	5	6	6	5	5	5	3	5	5	5	5	5	early-stage	Female	23	Urban	fixed duration
2020-04-25 16:17:45	1043	2	1	2	1	1	6	1	3	6	1	5	7	6	6	7	7	5	4	7	6	6	6	7	5	4	7	5	7	5	7	7	6	5	5	5	6	6	early-stage	Female	32	Urban	fixed duration
2020-04-21 17:24:22	844	2	4	3	3	4	4	3	2	4	1	6	6	6	4	1	1	2	1	3	4	4	5	4	6	5	3	2	4	2	2	6	5	3	3	4	4	2	early-stage	Female	31	Urban	fixed duration
2020-04-24 22:38:48	966	2	5	5	3	1	7	7	1	7	1	7	7	5	7	4	1	6	7	7	6	5	4	7	7	7	5	1	6	7	5	7	5	2	4	6	6	1	early-stage	Female	26	Urban	fixed duration
2020-04-17 00:20:05	695	2	5	4	5	3	5	4	1	3	1	3	3	2	5	2	2	2	5	5	6	6	6	6	6	6	7	7	7	7	7	7	1	7	1	2	7	7	early-stage	Female	48	Urban	fixed duration
2020-04-05 22:15:56	258	1	7	7	7	7	6	7	7	7	7	7	7	7	6	1	1	1	1	1	7	7	7	7	7	7	4	4	4	1	1	2	7	7	7	7	2	2	definitive	Female	24	Urban	fixed duration
2020-04-09 08:08:45	363	1	7	7	6	6	3	7	7	7	7	7	7	7	1	1	1	1	1	3	7	7	7	6	4	7	1	1	2	1	3	1	7	7	7	7	2	1	definitive	Female	52	Urban	fixed duration
2020-04-05 10:04:43	162	1	5	6	5	6	1	7	6	7	7	7	7	7	2	2	7	2	1	4	7	7	6	7	7	7	1	1	5	1	1	5	7	7	7	7	2	1	definitive	Female	29	Urban	fixed duration
2020-04-05 11:17:14	186	1	6	6	5	5	2	6	6	6	6	6	6	6	2	4	3	3	2	2	3	6	6	6	6	6	2	2	2	2	6	2	6	6	6	6	1	2	definitive	Female	32	Urban	fixed duration
2020-04-09 19:24:14	368	1	6	7	6	5	1	7	6	6	7	6	6	7	2	1	1	1	1	1	7	6	6	6	7	7	1	1	1	1	1	1	7	6	6	6	1	1	definitive	Female	38	Urban	fixed duration
2020-04-06 12:22:46	282	1	6	6	5	5	2	5	4	6	5	6	5	5	3	4	1	1	1	1	5	5	5	5	5	5	4	3	4	3	2	4	4	2	5	3	4	4	definitive	Female	42	Urban	fixed duration
2020-04-09 09:37:09	365	1	4	5	5	4	7	5	4	4	5	6	5	4	5	6	6	5	4	6	7	5	5	6	7	4	5	2	5	6	7	6	5	4	4	6	2	6	definitive	Female	28	Urban	fixed duration
2020-04-05 14:08:47	226	1	5	6	5	6	6	6	6	6	5	6	6	6	4	1	3	2	3	6	6	6	6	6	6	6	2	3	5	3	3	7	4	5	5	5	2	2	definitive	Female	44	Urban	fixed duration
2020-04-05 13:32:55	218	1	6	6	5	5	2	6	5	3	3	3	4	4	4	3	1	1	1	2	2	6	5	2	4	3	1	5	3	2	4	1	3	4	4	4	3	3	definitive	Female	36	Urban	fixed duration
2020-04-04 18:38:05	22	1	5	4	4	4	5	5	3	4	3	4	4	4	5	3	3	4	4	5	4	3	3	5	5	5	4	4	3	4	3	3	3	3	3	3	3	3	definitive	Female	20	Urban	fixed duration
2020-04-05 23:33:56	261	1	3	2	2	2	7	4	1	7	2	7	4	4	7	5	4	4	4	6	6	4	4	5	7	5	7	2	5	5	6	4	1	4	4	5	2	4	definitive	Female	24	Urban	fixed duration
2020-04-04 18:27:07	15	1	2	2	1	1	1	1	1	2	1	3	3	2	1	2	2	2	2	3	2	2	1	2	2	3	2	2	2	2	2	2	2	2	2	2	2	2	definitive	Female	30	Urban	fixed duration
2020-04-19 16:20:19	775	2	6	7	7	7	4	7	7	7	7	7	7	7	1	1	7	2	1	6	7	7	7	7	7	7	2	1	2	2	2	6	6	7	7	7	1	2	definitive	Female	48	Urban	fixed duration
2020-04-25 15:21:53	1035	2	6	6	7	7	7	7	7	7	7	7	7	7	5	3	3	3	3	3	7	7	7	7	7	7	4	3	3	3	3	3	7	7	7	7	4	2	definitive	Female	21	Urban	fixed duration
2020-04-17 12:35:33	744	2	7	6	6	6	4	6	7	7	6	7	7	7	2	1	2	1	1	1	7	6	7	7	6	7	1	1	7	1	1	2	7	7	6	7	1	1	definitive	Female	40	Urban	fixed duration
2020-04-16 20:07:16	589	2	6	4	5	5	4	4	4	5	2	5	5	5	3	3	3	3	3	1	7	6	5	7	7	7	1	1	1	2	1	4	4	4	4	3	3	3	definitive	Female	31	Urban	fixed duration
2020-04-16 20:53:41	618	2	6	7	7	5	7	6	7	7	7	7	6	6	1	1	4	1	1	1	7	6	6	7	7	7	1	1	1	1	1	5	7	7	7	7	1	1	definitive	Female	27	Urban	fixed duration
2020-04-17 15:57:49	759	2	6	6	5	5	4	6	7	7	7	7	7	7	3	4	3	4	3	3	6	6	5	6	7	6	1	3	4	2	5	4	6	5	7	6	2	2	definitive	Female	43	Urban	fixed duration
2020-04-25 17:35:15	1052	2	5	6	4	5	6	6	5	6	5	5	5	5	3	1	4	2	1	2	7	6	5	5	6	6	1	1	2	2	2	2	6	4	4	6	3	3	definitive	Female	32	Urban	fixed duration
2020-04-21 11:01:22	810	2	5	5	4	5	4	4	5	4	5	5	5	5	3	4	2	5	4	3	6	6	4	6	6	6	3	5	5	6	5	2	6	6	6	6	4	3	definitive	Female	45	Urban	fixed duration
2020-04-22 14:02:15	886	2	7	7	7	7	6	6	6	7	4	7	7	6	6	1	1	1	1	7	7	7	7	7	7	7	5	7	4	7	4	6	6	7	7	7	4	4	definitive	Female	38	Urban	fixed duration
2020-04-16 20:37:48	608	2	5	5	4	5	6	4	5	6	5	6	6	6	4	4	5	4	4	5	5	6	6	6	6	6	4	4	5	4	5	5	5	5	5	6	4	3	definitive	Female	34	Urban	fixed duration
2020-04-25 10:18:29	999	2	5	4	3	2	6	5	4	6	5	6	6	4	5	5	4	5	4	5	5	5	6	5	5	6	5	4	6	5	6	4	4	4	4	5	6	5	definitive	Female	30	Urban	fixed duration
2020-04-24 21:26:05	941	2	3	3	4	4	5	4	4	5	3	6	6	6	4	5	2	3	3	4	6	6	5	5	6	3	3	2	3	3	4	5	4	3	3	3	4	3	definitive	Female	21	Urban	fixed duration
2020-04-25 12:33:51	1011	2	5	5	4	3	4	3	3	3	2	1	3	2	6	5	6	4	4	4	3	4	4	4	5	4	6	6	5	3	7	5	4	3	3	5	5	5	definitive	Female	41	Urban	fixed duration
2020-04-16 21:51:19	658	2	5	1	5	5	2	6	5	6	1	3	5	4	7	1	7	1	1	6	4	4	1	6	7	6	6	2	2	5	2	1	4	3	3	1	4	4	definitive	Female	37	Urban	fixed duration
2020-04-25 15:51:43	1041	2	6	6	6	6	1	7	6	7	6	6	6	7	1	1	1	1	1	1	7	7	7	7	7	7	1	1	1	1	1	1	7	7	7	7	2	2	definitive	Female	29	Urban	fixed duration
2020-04-25 14:34:08	1022	2	5	5	5	3	7	4	4	6	3	6	7	5	7	4	6	5	5	7	7	5	5	7	7	7	5	6	7	5	4	5	4	4	4	4	5	7	definitive	Female	28	Urban	fixed duration
2020-04-16 20:27:29	602	2	5	4	3	5	7	5	3	7	2	6	7	6	6	4	4	3	2	7	7	7	7	7	1	7	5	2	3	5	2	7	2	2	5	6	6	3	definitive	Female	28	Urban	fixed duration
2020-05-05 12:33:55	1096	2	5	6	5	6	5	3	3	3	2	2	3	3	3	3	3	3	2	2	5	5	5	4	5	4	4	4	4	2	4	3	3	3	4	4	2	3	definitive	Female	42	Urban	fixed duration
2020-04-17 12:11:51	741	2	3	2	2	3	7	2	2	2	2	2	6	2	6	7	4	4	4	7	6	4	4	4	2	3	3	3	3	5	5	6	1	1	1	3	6	6	definitive	Female	45	Urban	fixed duration
2020-04-25 11:27:03	1006	2	2	2	2	2	4	2	2	2	2	2	2	2	3	3	3	3	3	4	3	3	2	2	1	3	6	4	6	6	5	5	3	4	4	4	6	6	definitive	Female	45	Urban	fixed duration
2020-04-23 10:33:47	912	2	1	2	1	2	2	2	1	1	1	1	1	1	1	1	2	2	2	2	2	2	1	2	1	1	2	2	1	2	2	2	2	1	1	2	2	2	definitive	Female	46	Urban	fixed duration
2020-04-15 11:06:19	517	2	1	1	1	2	3	1	2	1	1	1	1	1	3	3	1	3	3	3	2	2	2	1	2	3	3	3	3	3	3	3	2	1	3	3	3	3	definitive	Female	45	Urban	fixed duration
2020-05-05 18:02:35	1106	2	2	4	6	7	7	4	1	1	1	1	1	2	1	7	5	7	7	7	4	4	2	2	2	2	7	7	7	7	7	7	2	1	2	2	7	7	definitive	Female	47	Urban	fixed duration
2020-04-24 21:15:49	934	2	1	2	2	2	2	3	1	2	1	6	1	3	7	7	7	7	6	7	4	2	2	7	3	5	7	7	7	7	7	7	1	1	1	1	7	7	definitive	Female	38	Urban	fixed duration
2020-04-10 21:55:11	396	1	7	7	5	6	2	6	7	7	7	7	7	7	1	1	1	1	1	1	5	6	5	5	7	6	1	1	1	2	4	2	6	5	6	6	6	2	second-degree certificate	Female	31	Urban	fixed duration
2020-04-07 00:32:10	301	1	3	2	2	3	7	6	1	7	1	7	6	6	7	7	2	1	7	6	6	6	5	6	6	6	7	7	7	7	5	6	4	6	5	6	7	7	second-degree certificate	Female	40	Urban	fixed duration
2020-04-05 19:03:45	250	1	1	2	1	2	7	1	1	1	1	1	1	2	7	6	1	2	6	7	6	2	6	1	1	6	7	6	6	6	6	2	6	2	2	2	5	7	second-degree certificate	Female	50	Urban	fixed duration
2020-04-14 10:22:08	461	1	1	1	1	1	1	1	1	1	1	1	1	1	1	1	1	1	1	1	1	1	1	1	1	1	1	1	1	1	1	1	1	1	1	1	1	1	second-degree certificate	Female	32	Urban	fixed duration
2020-04-25 22:49:44	1064	2	6	5	6	6	7	4	6	5	6	6	6	5	5	4	6	2	2	3	6	6	4	6	4	6	1	5	5	5	5	6	6	6	6	6	5	5	second-degree certificate	Female	33	Urban	fixed duration
2020-04-25 16:23:35	1044	2	5	6	3	5	4	5	4	5	5	5	5	5	4	4	4	5	4	5	6	5	4	5	3	6	5	5	5	5	5	4	6	6	6	6	5	5	second-degree certificate	Female	32	Urban	fixed duration
2020-04-17 19:34:00	766	2	6	6	4	4	5	5	4	5	4	5	4	4	6	7	4	4	3	5	5	4	5	5	5	5	6	6	5	5	4	5	4	4	5	4	5	5	second-degree certificate	Female	47	Urban	fixed duration
2020-04-28 14:04:02	1087	2	4	6	1	4	4	4	1	5	1	4	4	4	7	4	1	4	4	7	4	4	2	5	7	6	4	4	4	4	6	2	5	4	7	7	5	4	second-degree certificate	Female	35	Urban	fixed duration
2020-04-14 14:37:17	501	1	6	6	5	4	6	6	5	6	5	6	6	5	6	6	6	6	6	6	5	5	6	6	6	6	6	5	6	5	4	6	5	6	5	5	5	6	first-degree certificate	Female	45	Urban	fixed duration
2020-04-05 15:05:48	235	1	6	6	5	6	5	5	5	6	5	4	6	6	3	1	2	3	2	3	6	6	6	6	7	6	2	2	2	2	2	1	6	5	4	6	2	1	first-degree certificate	Female	46	Urban	fixed duration
2020-04-05 08:41:52	137	1	5	4	5	5	6	5	6	5	4	4	5	5	6	6	2	6	6	7	6	5	4	5	5	5	7	6	7	6	7	6	5	5	5	5	6	7	first-degree certificate	Female	51	Urban	fixed duration
2020-04-05 01:35:42	108	1	5	5	4	3	5	2	4	5	2	5	6	7	7	6	5	4	6	7	5	3	2	6	6	6	6	5	6	4	5	7	5	6	7	5	6	6	first-degree certificate	Female	48	Urban	fixed duration
2020-04-06 07:20:38	268	1	5	7	6	7	7	4	5	7	6	7	7	7	6	6	7	5	1	6	7	6	5	7	7	7	2	2	3	1	1	7	7	6	6	7	2	1	first-degree certificate	Female	54	Urban	fixed duration
2020-04-07 09:23:03	305	1	6	5	5	6	7	5	5	6	4	6	6	6	7	6	2	5	4	7	6	5	5	6	7	6	7	6	6	5	4	5	5	5	5	6	6	7	first-degree certificate	Female	47	Urban	fixed duration
2020-04-07 17:55:18	321	1	7	7	7	6	2	6	6	7	6	6	6	6	1	1	6	1	1	3	3	6	6	6	6	6	1	1	1	1	2	2	6	6	6	6	1	1	first-degree certificate	Female	49	Urban	fixed duration
2020-04-07 13:50:25	309	1	4	6	5	5	7	5	6	6	5	6	5	6	3	2	1	1	4	7	6	7	7	6	7	7	3	3	2	1	2	7	7	7	7	7	5	1	first-degree certificate	Female	64	Urban	fixed duration
2020-04-27 14:07:37	1079	2	7	7	7	7	5	7	7	7	5	7	7	7	1	1	1	1	1	1	7	7	7	7	7	7	1	1	1	1	1	1	7	5	7	7	1	1	first-degree certificate	Female	55	Urban	fixed duration
2020-04-16 13:34:31	532	2	5	6	4	5	6	4	6	6	6	6	6	6	3	5	4	5	4	5	6	6	6	6	6	6	3	2	3	4	6	1	6	6	6	6	2	2	first-degree certificate	Female	53	Urban	fixed duration
2020-05-06 19:01:47	1116	2	5	5	5	5	5	5	5	6	5	5	5	6	5	3	2	2	2	5	6	6	6	7	7	7	2	2	3	3	3	2	6	5	6	7	4	2	first-degree certificate	Female	51	Urban	fixed duration
2020-04-25 09:18:04	990	2	4	5	5	6	6	7	5	5	3	5	3	4	6	3	5	6	5	6	7	5	2	5	5	5	6	6	7	7	7	7	3	4	4	5	5	7	first-degree certificate	Female	62	Urban	fixed duration
2020-04-27 12:09:43	1076	2	4	4	4	4	6	3	3	4	4	6	5	4	5	6	6	6	6	7	6	4	5	5	6	6	5	5	6	6	4	6	4	6	4	4	4	5	first-degree certificate	Female	61	Urban	fixed duration
2020-04-16 21:13:26	632	2	2	4	2	2	4	4	2	2	1	2	2	2	2	4	4	4	6	6	2	2	2	2	2	2	6	6	6	7	7	2	1	2	2	2	2	6	first-degree certificate	Female	60	Urban	fixed duration
2020-04-25 09:49:01	995	2	5	3	2	3	3	2	3	2	1	2	2	3	3	1	1	2	1	3	2	1	2	3	2	3	3	2	2	7	5	7	1	2	1	5	5	5	first-degree certificate	Female	65	Urban	fixed duration
2020-04-05 03:11:56	115	1	6	6	4	5	5	4	5	6	5	6	6	6	4	2	5	5	2	3	3	6	6	6	6	6	2	2	2	2	2	4	6	5	5	5	2	2	Ph.D. degree	Female	45	Urban	fixed duration
2020-04-07 14:25:55	310	1	6	7	6	6	5	6	7	7	7	7	6	6	7	4	1	5	1	7	5	7	7	7	7	7	2	2	2	2	2	2	7	7	7	7	2	2	Ph.D. degree	Female	45	Urban	fixed duration
2020-04-05 13:35:11	219	1	6	7	5	5	5	5	3	7	3	7	7	7	2	3	5	6	3	6	7	6	7	7	7	7	1	1	3	6	2	5	7	7	7	7	6	4	Ph.D. degree	Female	50	Urban	fixed duration
2020-04-11 10:38:07	407	1	6	6	6	5	6	6	7	5	6	7	7	7	3	3	7	3	3	7	7	7	7	6	7	6	4	3	5	2	3	7	7	7	7	7	3	6	Ph.D. degree	Female	53	Urban	fixed duration
2020-04-04 18:01:30	1	1	6	6	6	6	5	5	6	5	6	6	5	6	5	6	7	6	6	5	5	6	6	6	7	5	5	4	4	5	3	7	7	6	6	6	4	3	Ph.D. degree	Female	53	Urban	fixed duration
2020-04-05 20:31:14	255	1	5	2	2	6	7	7	4	7	2	7	7	6	7	1	7	6	7	7	7	6	7	7	7	7	7	2	7	7	7	6	2	4	1	5	1	1	Ph.D. degree	Female	27	Urban	fixed duration
2020-04-04 18:30:18	18	1	1	1	1	1	1	2	1	2	1	2	2	1	2	2	1	2	2	2	1	1	2	2	2	2	2	2	2	1	1	1	2	1	1	2	2	1	Ph.D. degree	Female	42	Urban	fixed duration
2020-04-17 14:15:36	751	2	6	5	3	5	4	4	3	6	3	4	5	6	5	5	2	3	5	5	5	5	6	6	6	6	5	5	3	5	3	2	3	4	4	5	4	3	Ph.D. degree	Female	38	Urban	fixed duration
2020-04-16 21:10:58	630	2	4	3	2	1	7	7	1	6	1	4	4	2	7	7	7	6	7	7	6	5	7	7	5	7	7	6	7	7	7	7	1	1	1	1	7	7	Ph.D. degree	Female	30	Urban	fixed duration
2020-04-24 18:25:57	928	2	5	5	6	6	1	7	1	7	5	7	7	7	1	1	6	1	1	1	7	7	7	7	7	7	1	1	1	1	1	3	7	6	6	6	1	1	Ph.D. degree	Female	40	Urban	fixed duration
2020-04-05 11:01:07	181	1	7	7	7	7	7	7	7	7	7	7	7	7	1	4	1	5	1	1	7	7	7	7	7	7	7	1	7	1	7	1	7	7	7	7	6	1	early-stage	Male	47	Urban	fixed duration
2020-04-04 18:28:11	16	1	6	5	3	4	6	3	5	5	4	6	6	6	5	3	4	4	2	6	6	6	6	6	6	6	6	5	5	4	4	1	4	6	6	6	6	4	early-stage	Male	36	Urban	fixed duration
2020-04-05 12:21:06	201	1	6	1	1	6	1	4	6	6	1	6	6	7	5	4	1	6	3	5	6	6	6	6	6	6	3	2	2	5	3	4	6	4	5	4	5	2	early-stage	Male	45	Urban	fixed duration
2020-04-06 11:53:36	276	1	5	6	4	4	5	4	3	7	3	7	5	4	6	3	7	2	3	7	6	4	7	6	6	7	4	2	4	4	2	6	4	5	3	5	2	2	early-stage	Male	30	Urban	fixed duration
2020-04-04 18:53:13	33	1	6	6	5	6	6	6	2	5	2	2	2	2	3	7	1	7	7	3	5	4	1	1	1	1	7	6	7	2	2	7	1	1	1	1	1	7	early-stage	Male	32	Urban	fixed duration
2020-04-09 08:45:42	364	1	6	6	5	6	5	6	6	6	6	5	6	6	5	5	5	1	1	5	6	6	5	1	6	6	1	1	1	2	1	1	6	6	6	6	1	1	definitive	Male	26	Urban	fixed duration
2020-04-14 11:43:33	463	1	6	6	6	6	5	5	6	7	6	7	7	7	3	2	1	2	2	3	6	6	7	7	7	6	2	2	2	1	2	2	6	6	6	6	2	2	definitive	Male	45	Urban	fixed duration
2020-04-14 17:29:24	509	1	7	6	3	1	4	7	1	7	4	7	6	6	2	2	4	2	4	7	6	6	2	6	6	5	2	2	5	1	1	4	4	6	4	5	2	3	definitive	Male	30	Urban	fixed duration
2020-04-16 20:46:51	612	2	4	7	5	6	7	7	5	7	6	7	7	7	6	5	4	7	7	7	7	7	7	7	7	7	7	7	7	7	7	7	7	7	7	7	7	7	definitive	Male	26	Urban	fixed duration
2020-04-24 23:05:59	974	2	6	7	5	5	3	3	3	7	3	7	7	7	3	4	7	3	3	3	7	7	7	5	7	6	5	1	4	4	3	7	5	5	5	7	7	4	definitive	Male	33	Urban	fixed duration
2020-04-16 20:49:50	614	2	4	5	3	3	4	3	3	4	4	3	3	3	3	2	3	3	1	2	4	4	1	2	2	1	2	3	2	2	2	2	1	2	1	1	2	2	definitive	Male	45	Urban	fixed duration
2020-04-16 19:48:24	582	2	7	7	5	5	1	6	7	7	7	7	7	7	1	5	7	4	1	2	4	7	7	7	7	6	1	1	4	1	1	4	7	6	7	7	5	2	first-degree certificate	Male	37	Urban	fixed duration
2020-04-22 14:45:57	891	2	4	4	4	4	4	4	4	4	4	4	4	4	4	4	4	4	4	4	4	4	4	4	4	4	4	4	4	4	4	4	4	4	4	4	4	4	first-degree certificate	Male	64	Urban	fixed duration
2020-04-05 07:59:46	130	1	7	7	6	6	2	6	6	6	6	7	5	6	1	2	4	2	1	2	6	6	6	7	7	5	2	2	2	1	3	2	6	5	7	6	2	1	Ph.D. degree	Male	54	Urban	fixed duration
2020-04-16 19:32:10	573	2	7	7	7	7	6	7	6	7	5	6	7	7	6	1	4	2	1	6	7	7	7	7	7	7	4	4	2	2	1	6	7	6	6	6	5	5	Ph.D. degree	Male	58	Urban	fixed duration
2020-04-16 21:20:37	639	2	6	5	5	5	4	5	6	7	7	6	6	6	1	1	2	2	2	2	7	7	7	6	7	7	1	1	1	1	1	1	7	7	7	7	1	1	Ph.D. degree	Male	63	Urban	fixed duration
2020-04-23 21:44:15	923	2	7	7	5	6	2	7	6	6	5	7	6	6	2	2	5	3	2	2	5	6	5	6	6	6	2	2	2	2	4	5	6	7	6	6	2	2	Ph.D. degree	Male	68	Urban	fixed duration
2020-04-10 10:19:12	378	1	5	7	7	7	5	7	5	7	6	7	6	7	3	2	6	2	2	2	6	6	7	4	7	7	2	6	2	2	2	4	7	5	5	7	6	2	early-stage	Female	29	Rural	unspecified duration
2020-04-11 21:19:17	424	1	6	6	5	6	7	6	7	7	5	7	6	6	3	5	6	1	1	4	7	7	7	7	7	6	3	3	4	1	1	5	7	7	7	7	4	1	early-stage	Female	28	Rural	unspecified duration
2020-04-05 08:11:41	132	1	3	2	1	3	2	7	2	7	4	7	7	7	4	7	1	2	3	2	6	7	1	2	7	2	1	1	4	2	4	5	2	1	2	3	1	1	early-stage	Female	41	Rural	unspecified duration
2020-05-05 15:14:22	1104	2	3	5	2	5	5	4	4	3	5	5	3	5	4	5	5	5	4	4	6	6	6	6	6	6	6	5	5	6	6	6	4	3	3	3	3	3	early-stage	Female	38	Rural	unspecified duration
2020-04-25 16:41:11	1046	2	2	1	1	2	2	1	2	3	1	3	2	2	2	1	1	2	2	1	2	1	2	3	3	2	3	1	2	1	1	3	1	1	1	2	1	2	early-stage	Female	20	Rural	unspecified duration
2020-04-14 11:59:04	467	1	6	7	6	7	2	3	7	7	7	7	6	6	1	1	1	1	1	3	3	7	6	7	7	7	1	1	1	1	1	1	7	7	7	7	1	1	definitive	Female	32	Rural	unspecified duration
2020-04-04 23:39:57	92	1	5	4	5	4	5	5	5	5	5	5	5	5	5	4	2	4	4	4	3	5	5	3	7	5	5	3	4	2	7	1	3	5	5	5	4	4	definitive	Female	23	Rural	unspecified duration
2020-04-05 08:45:07	138	1	6	6	5	5	3	4	6	2	2	3	7	7	4	5	1	1	1	1	7	6	5	7	7	7	1	1	1	1	6	1	7	4	4	7	1	5	definitive	Female	31	Rural	unspecified duration
2020-04-05 01:33:33	107	1	5	5	4	5	5	5	5	5	5	5	5	5	4	5	1	4	4	5	5	5	5	5	6	6	4	4	4	6	4	2	5	6	6	6	6	6	definitive	Female	39	Rural	unspecified duration
2020-04-04 18:07:06	4	1	3	3	3	3	6	5	3	1	1	1	3	3	3	3	3	3	3	5	3	3	1	1	5	3	3	2	3	4	5	5	1	2	2	2	4	5	definitive	Female	42	Rural	unspecified duration
2020-04-05 10:28:22	172	1	2	1	1	1	7	1	1	4	1	3	2	2	2	2	3	6	6	7	6	2	5	4	6	5	6	6	6	7	7	5	1	2	2	3	6	7	definitive	Female	31	Rural	unspecified duration
2020-04-24 21:21:16	937	2	5	5	5	4	4	4	5	7	4	7	1	5	3	1	5	1	1	1	7	4	5	5	7	4	1	3	1	1	2	2	2	3	3	6	2	3	definitive	Female	23	Rural	unspecified duration
2020-04-05 09:38:17	154	1	7	6	6	6	1	6	6	6	5	5	5	5	1	1	1	1	1	2	6	6	6	5	5	5	1	1	1	1	1	1	6	6	6	6	2	1	second-degree certificate	Female	41	Rural	unspecified duration
2020-04-05 01:00:17	103	1	6	6	5	6	6	6	7	7	6	5	6	6	3	5	4	6	3	6	6	6	6	6	6	7	2	5	5	3	5	4	7	7	6	7	3	4	second-degree certificate	Female	41	Rural	unspecified duration
2020-04-04 19:26:11	47	1	6	7	6	6	5	6	6	6	6	5	6	6	4	2	5	3	2	2	6	6	6	6	6	6	2	2	2	2	5	5	6	6	6	6	4	3	second-degree certificate	Female	39	Rural	unspecified duration
2020-04-04 19:18:29	43	1	6	6	5	6	5	6	6	5	5	5	5	6	4	2	5	1	1	2	6	6	6	6	6	6	2	2	2	2	2	5	6	6	6	6	2	2	second-degree certificate	Female	32	Rural	unspecified duration
2020-04-04 19:18:41	44	1	6	6	5	6	5	6	6	5	5	5	5	6	4	2	5	1	1	2	6	6	6	6	6	6	2	2	2	2	2	5	6	6	6	6	2	2	second-degree certificate	Female	32	Rural	unspecified duration
2020-04-08 19:28:41	338	1	6	6	5	5	7	5	5	5	5	6	7	6	7	4	1	3	2	3	4	4	4	4	4	6	4	5	5	4	6	2	6	5	5	7	6	7	second-degree certificate	Female	43	Rural	unspecified duration
2020-04-05 12:30:57	203	1	6	6	6	6	6	7	6	7	6	6	6	6	6	4	2	2	1	5	6	6	1	6	7	6	5	1	1	4	1	1	5	6	6	6	1	1	second-degree certificate	Female	37	Rural	unspecified duration
2020-04-05 16:31:05	244	1	5	6	5	6	6	5	5	6	5	6	6	6	3	5	4	2	1	5	6	6	6	6	6	6	2	2	3	2	2	4	5	5	6	5	4	3	second-degree certificate	Female	33	Rural	unspecified duration
2020-04-12 08:22:38	431	1	5	4	4	5	6	4	2	3	2	2	5	5	6	4	3	2	5	6	6	6	2	2	6	6	6	6	6	6	6	2	2	4	4	6	4	6	second-degree certificate	Female	41	Rural	unspecified duration
2020-04-04 19:07:17	38	1	5	6	3	5	6	3	4	5	4	6	3	6	5	4	1	1	1	7	6	6	4	2	6	6	2	2	1	2	5	1	6	6	6	6	2	1	second-degree certificate	Female	31	Rural	unspecified duration
2020-04-08 21:36:37	353	1	4	1	2	2	2	3	2	1	4	2	1	1	2	4	7	6	7	4	1	1	4	2	1	1	1	7	7	6	3	6	4	3	5	6	6	6	second-degree certificate	Female	62	Rural	unspecified duration
2020-04-09 07:22:06	362	1	3	6	3	6	3	6	3	5	3	5	6	6	7	4	7	4	4	7	5	6	7	7	5	6	7	3	7	6	7	4	6	6	6	6	7	3	second-degree certificate	Female	40	Rural	unspecified duration
2020-04-06 20:14:44	292	1	3	2	2	3	5	3	1	2	1	1	1	1	4	7	1	3	4	4	1	2	1	1	1	3	3	3	3	3	4	7	4	1	1	1	3	4	second-degree certificate	Female	40	Rural	unspecified duration
2020-04-07 00:37:09	302	1	5	6	2	6	2	6	4	5	6	6	6	6	6	4	3	4	1	1	4	2	4	1	4	4	1	1	1	1	1	1	6	6	6	1	1	4	second-degree certificate	Female	50	Rural	unspecified duration
2020-04-16 20:43:16	610	2	6	5	3	5	6	6	6	6	5	7	5	5	4	4	3	3	3	3	7	7	4	6	6	6	4	4	4	3	1	4	6	4	4	6	5	4	second-degree certificate	Female	34	Rural	unspecified duration
2020-05-03 18:56:22	1094	2	6	6	5	6	2	7	6	7	6	6	6	6	3	2	1	1	2	3	6	6	6	6	6	7	2	2	2	3	2	1	6	6	6	6	4	2	second-degree certificate	Female	36	Rural	unspecified duration
2020-04-21 09:54:38	794	2	6	6	4	6	2	5	5	6	4	6	6	6	4	2	1	2	1	2	6	6	5	5	5	6	4	2	4	4	4	4	5	5	5	5	4	4	second-degree certificate	Female	32	Rural	unspecified duration
2020-05-06 22:39:22	1119	2	6	6	6	6	6	4	4	6	4	6	4	6	6	4	4	1	2	7	7	7	7	6	7	7	6	4	7	1	1	6	6	1	4	4	5	1	second-degree certificate	Female	37	Rural	unspecified duration
2020-04-17 12:56:30	745	2	3	1	2	2	6	4	4	2	1	2	4	4	4	1	4	4	6	7	7	7	5	1	7	7	7	7	3	7	7	4	2	1	4	4	3	3	second-degree certificate	Female	44	Rural	unspecified duration
2020-04-25 15:17:55	1034	2	2	2	2	2	6	4	3	5	3	4	3	4	6	1	1	5	6	7	6	6	5	5	6	6	7	5	6	6	6	7	4	4	4	4	4	6	second-degree certificate	Female	29	Rural	unspecified duration
2020-04-05 09:34:24	150	1	6	7	6	6	1	7	6	7	6	7	6	7	2	1	4	2	2	1	5	7	5	5	7	7	1	1	1	1	1	3	7	6	6	7	1	1	first-degree certificate	Female	50	Rural	unspecified duration
2020-04-06 20:29:02	293	1	2	5	3	3	4	3	6	6	6	6	6	6	2	3	4	2	2	2	3	3	4	4	5	5	2	2	2	3	4	4	6	5	6	6	5	5	first-degree certificate	Female	41	Rural	unspecified duration
2020-04-05 10:06:49	163	1	7	6	6	6	5	6	7	7	7	6	7	7	4	1	2	2	1	2	7	7	7	7	7	7	1	1	1	1	1	1	7	7	7	7	1	1	first-degree certificate	Female	39	Rural	unspecified duration
2020-04-05 09:52:30	158	1	6	7	7	7	4	6	6	6	6	7	7	7	5	4	1	1	1	2	6	6	6	6	7	6	1	1	1	1	1	1	6	6	6	6	1	1	first-degree certificate	Female	40	Rural	unspecified duration
2020-04-05 00:10:31	94	1	6	6	6	6	2	6	6	7	6	7	6	6	2	2	2	2	1	2	6	6	6	6	6	6	2	2	2	2	2	2	6	5	5	6	2	2	first-degree certificate	Female	38	Rural	unspecified duration
2020-04-11 23:14:44	429	1	5	5	5	5	3	5	6	5	6	6	3	4	3	5	4	3	3	6	7	6	5	2	6	5	2	5	5	2	5	5	6	6	6	6	4	2	first-degree certificate	Female	60	Rural	unspecified duration
2020-04-09 23:57:59	370	1	5	6	6	6	6	5	6	5	5	3	3	4	6	5	4	6	3	6	6	6	6	6	6	6	5	6	4	5	6	3	6	6	6	6	6	6	first-degree certificate	Female	53	Rural	unspecified duration
2020-04-05 12:36:57	205	1	6	6	5	5	4	4	5	5	5	5	5	6	5	5	5	4	4	5	6	7	6	5	7	7	5	5	4	2	6	3	6	6	6	6	3	3	first-degree certificate	Female	52	Rural	unspecified duration
2020-04-05 09:19:29	146	1	6	6	4	4	1	6	4	7	4	7	4	6	2	2	7	1	1	2	6	7	4	6	6	6	2	1	5	4	1	1	4	4	4	7	1	2	first-degree certificate	Female	40	Rural	unspecified duration
2020-04-14 12:23:42	483	1	6	5	4	5	5	6	6	6	5	6	6	6	5	5	4	5	4	4	5	5	6	5	7	6	6	4	6	6	6	4	6	7	6	6	4	6	first-degree certificate	Female	41	Rural	unspecified duration
2020-04-08 19:34:18	339	1	6	5	2	4	6	6	5	6	5	6	6	6	4	3	5	4	4	4	6	5	5	6	6	6	4	3	4	4	3	4	4	4	4	5	4	2	first-degree certificate	Female	38	Rural	unspecified duration
2020-04-04 22:14:22	76	1	5	5	5	5	5	5	5	5	5	5	5	5	5	5	5	5	5	5	5	5	5	5	5	5	5	5	5	5	5	5	5	5	5	5	5	5	first-degree certificate	Female	46	Rural	unspecified duration
2020-04-05 10:00:35	161	1	4	5	2	5	6	6	6	5	4	5	5	5	3	5	5	4	5	7	5	4	4	5	4	6	6	5	5	5	5	4	5	5	4	4	4	5	first-degree certificate	Female	55	Rural	unspecified duration
2020-04-08 23:34:57	359	1	7	7	6	6	6	6	7	7	7	6	6	3	4	2	1	2	1	4	7	7	7	7	7	7	1	1	1	1	1	2	7	7	6	7	5	1	first-degree certificate	Female	52	Rural	unspecified duration
2020-04-05 11:01:07	180	1	2	6	2	5	6	6	6	6	6	6	6	6	6	6	1	2	2	6	6	6	3	5	7	7	5	4	6	6	6	2	6	5	5	7	4	2	first-degree certificate	Female	53	Rural	unspecified duration
2020-04-05 09:37:42	152	1	6	5	5	5	6	7	5	7	5	7	4	5	4	2	1	3	2	4	7	5	7	5	3	2	5	1	1	4	3	1	7	6	5	5	5	1	first-degree certificate	Female	42	Rural	unspecified duration
2020-04-05 09:28:41	149	1	5	5	2	4	5	2	4	6	2	7	7	7	7	6	6	7	6	7	6	5	5	5	6	5	6	5	6	7	7	7	5	6	5	5	5	6	first-degree certificate	Female	55	Rural	unspecified duration
2020-04-04 21:42:43	74	1	3	4	2	2	6	6	2	5	2	2	2	3	7	6	6	3	5	7	6	4	5	5	5	4	6	6	6	6	7	7	3	3	3	4	6	6	first-degree certificate	Female	52	Rural	unspecified duration
2020-04-05 08:59:37	141	1	5	4	4	3	7	6	1	6	2	6	6	6	6	4	3	4	4	7	4	5	5	5	7	6	7	4	6	3	2	3	4	3	3	3	3	2	first-degree certificate	Female	43	Rural	unspecified duration
2020-04-05 12:50:05	206	1	5	5	4	3	7	4	3	5	4	5	5	5	6	5	4	5	4	6	6	4	5	4	5	6	6	4	6	6	5	4	5	3	4	6	4	5	first-degree certificate	Female	42	Rural	unspecified duration
2020-04-04 18:09:37	6	1	5	4	1	4	7	5	5	5	3	5	5	4	5	5	4	5	6	6	6	5	5	3	5	5	5	5	5	5	5	5	3	5	3	5	5	5	first-degree certificate	Female	53	Rural	unspecified duration
2020-04-05 14:28:26	230	1	6	6	3	5	6	5	3	3	3	3	5	5	4	4	4	5	4	5	6	6	5	5	6	5	5	6	3	3	4	1	6	6	6	6	6	6	first-degree certificate	Female	52	Rural	unspecified duration
2020-04-13 08:32:06	445	1	3	6	3	5	5	5	5	6	5	6	6	5	7	6	1	6	5	6	6	6	6	6	7	6	6	6	4	6	6	1	6	6	6	6	6	6	first-degree certificate	Female	44	Rural	unspecified duration
2020-04-05 13:05:08	212	1	5	4	4	4	5	5	7	6	4	5	5	5	4	2	1	2	1	4	3	2	3	1	7	5	2	2	2	1	2	1	3	4	7	7	4	3	first-degree certificate	Female	43	Rural	unspecified duration
2020-04-06 09:52:33	274	1	5	4	2	3	6	4	5	6	4	6	6	5	5	5	2	4	5	6	7	6	6	5	7	6	4	4	4	1	3	5	5	2	3	3	1	2	first-degree certificate	Female	50	Rural	unspecified duration
2020-04-05 11:45:09	191	1	1	2	1	2	3	3	1	3	1	3	2	2	3	3	1	3	2	3	3	2	1	1	3	3	2	3	2	2	3	2	3	3	3	2	1	1	first-degree certificate	Female	48	Rural	unspecified duration
2020-04-25 10:32:34	1002	2	7	7	7	7	1	7	7	7	7	7	7	7	1	1	7	1	1	1	7	7	7	7	7	7	1	1	1	1	1	5	7	7	7	7	1	1	first-degree certificate	Female	58	Rural	unspecified duration
2020-04-23 10:54:20	914	2	6	7	5	6	6	5	6	7	6	6	6	7	5	2	1	2	1	2	6	6	6	6	7	6	7	7	1	7	1	1	7	6	7	7	1	7	first-degree certificate	Female	46	Rural	unspecified duration
2020-04-25 22:10:32	1063	2	6	7	5	5	2	7	5	7	5	6	6	7	1	2	2	2	2	2	6	6	6	6	6	6	2	2	2	2	2	4	6	4	4	5	2	2	first-degree certificate	Female	51	Rural	unspecified duration
2020-04-25 16:33:22	1045	2	6	4	4	5	5	5	5	4	5	5	6	6	5	5	5	4	2	3	4	5	5	5	5	4	3	1	2	2	5	4	5	3	4	4	4	4	first-degree certificate	Female	45	Rural	unspecified duration
2020-05-05 14:15:28	1101	2	6	6	6	5	4	7	7	6	7	6	6	6	3	2	6	1	1	2	4	4	4	4	5	5	2	2	2	3	2	1	6	3	4	4	1	1	first-degree certificate	Female	41	Rural	unspecified duration
2020-04-17 09:30:39	711	2	5	7	6	6	6	5	6	6	6	6	5	6	6	6	4	5	3	4	6	7	6	6	6	6	5	4	4	4	4	3	7	7	7	7	6	6	first-degree certificate	Female	54	Rural	unspecified duration
2020-04-17 07:45:59	699	2	6	6	5	4	2	6	3	5	6	6	4	4	3	4	4	2	2	3	6	6	6	6	6	6	4	3	3	2	2	2	7	7	7	7	7	5	first-degree certificate	Female	46	Rural	unspecified duration
2020-04-17 09:51:09	719	2	5	6	6	5	6	6	5	6	5	6	6	5	6	6	2	6	4	6	6	6	6	5	5	6	6	6	6	6	7	7	4	6	5	6	6	6	first-degree certificate	Female	48	Rural	unspecified duration
2020-04-15 21:57:16	521	2	5	6	2	5	4	4	5	5	5	2	6	5	2	2	6	2	2	2	6	6	5	5	6	6	2	5	5	2	6	5	5	5	6	6	2	5	first-degree certificate	Female	39	Rural	unspecified duration
2020-04-25 11:19:58	1005	2	5	6	2	5	4	5	5	5	3	5	5	5	5	6	5	6	6	6	5	5	4	2	5	5	5	6	6	1	7	4	3	5	6	4	6	6	first-degree certificate	Female	44	Rural	unspecified duration
2020-04-28 14:02:58	1086	2	6	7	5	4	5	5	1	6	1	6	6	6	6	5	1	5	5	4	7	6	7	7	5	6	5	5	6	5	5	1	6	6	6	7	4	4	first-degree certificate	Female	49	Rural	unspecified duration
2020-04-21 17:58:03	846	2	5	4	5	5	5	6	4	6	4	6	6	6	6	6	6	2	2	6	5	5	4	5	6	6	6	6	6	6	6	4	4	4	4	4	4	6	first-degree certificate	Female	46	Rural	unspecified duration
2020-05-05 14:02:13	1099	2	2	2	1	5	7	7	1	4	2	7	5	2	2	3	6	6	6	6	1	7	2	6	7	4	7	7	4	4	7	7	1	7	1	7	4	3	first-degree certificate	Female	40	Rural	unspecified duration
2020-04-17 02:08:52	697	2	7	5	4	7	6	1	1	7	1	4	7	7	1	1	4	1	4	7	6	6	4	7	4	7	4	1	7	4	1	7	7	6	4	7	6	4	first-degree certificate	Female	20	Rural	unspecified duration
2020-04-25 15:47:52	1040	2	3	3	2	3	2	2	3	3	3	3	3	3	3	3	3	2	3	2	2	2	2	2	3	3	2	2	2	2	2	2	2	2	2	2	2	2	first-degree certificate	Female	41	Rural	unspecified duration
2020-05-01 19:37:52	1090	2	2	5	2	4	7	6	2	3	2	3	5	6	7	5	5	6	4	7	6	5	6	7	6	6	6	6	6	6	7	5	5	6	6	6	6	6	first-degree certificate	Female	59	Rural	unspecified duration
2020-05-05 14:30:38	1102	2	1	2	1	1	7	2	1	1	1	1	1	2	1	6	7	7	7	6	6	1	7	7	6	6	7	7	7	7	7	7	1	1	1	1	7	7	first-degree certificate	Female	45	Rural	unspecified duration
2020-04-14 23:15:46	514	1	7	5	1	5	7	7	5	6	4	6	6	7	7	1	5	2	1	7	6	7	7	7	7	6	5	6	6	4	5	7	5	5	6	6	6	6	Ph.D. degree	Female	54	Rural	unspecified duration
2020-04-12 09:09:55	433	1	7	7	5	5	6	5	4	7	4	5	7	6	1	3	5	1	1	4	6	6	5	6	7	7	4	1	4	4	1	6	4	6	6	7	1	2	Ph.D. degree	Female	31	Rural	unspecified duration
2020-04-14 23:08:52	513	1	4	7	5	5	7	7	7	5	1	6	7	6	6	5	5	1	4	7	7	7	7	7	7	7	5	5	7	1	5	7	6	6	6	6	7	7	Ph.D. degree	Female	54	Rural	unspecified duration
2020-04-11 21:57:04	427	1	6	7	6	7	5	7	7	7	6	7	7	7	4	1	1	1	1	5	7	7	7	7	7	7	1	1	1	1	1	2	7	7	7	7	1	1	early-stage	Male	21	Rural	unspecified duration
2020-04-16 22:24:06	671	2	6	6	3	4	5	6	4	3	5	5	5	4	6	1	6	2	4	4	3	6	5	5	6	5	4	5	4	4	3	6	4	3	3	4	3	3	early-stage	Male	45	Rural	unspecified duration
2020-04-20 11:40:12	779	2	7	6	2	6	2	2	6	7	6	6	6	6	2	2	2	2	2	2	6	6	6	6	6	6	2	2	2	2	2	2	6	6	6	6	2	2	second-degree certificate	Male	41	Rural	unspecified duration
2020-04-25 13:26:12	1014	2	2	1	1	3	7	2	1	4	1	4	2	3	7	7	5	6	7	7	5	4	3	5	6	5	6	6	6	6	6	6	2	2	2	2	6	6	second-degree certificate	Male	46	Rural	unspecified duration
2020-04-05 09:11:19	144	1	7	6	5	6	1	4	4	6	6	6	6	7	1	3	6	5	1	1	7	6	6	6	7	6	1	1	1	6	1	1	4	6	6	7	4	1	first-degree certificate	Male	42	Rural	unspecified duration
2020-04-05 10:41:34	175	1	5	4	4	5	4	6	5	6	5	6	5	6	5	7	5	6	4	1	7	6	1	1	5	5	1	1	2	2	1	5	6	6	6	6	2	2	first-degree certificate	Male	39	Rural	unspecified duration
2020-04-05 23:48:56	262	1	4	6	4	3	5	4	6	6	6	4	6	5	6	2	1	4	4	5	6	6	6	6	6	6	2	2	2	2	4	2	6	3	3	6	2	2	first-degree certificate	Male	59	Rural	unspecified duration
2020-04-11 18:24:11	418	1	4	2	1	3	7	5	2	3	4	4	4	5	3	2	1	7	4	6	2	4	6	3	4	5	7	3	7	5	6	7	6	4	4	3	4	6	first-degree certificate	Male	61	Rural	unspecified duration
2020-04-16 22:27:51	672	2	6	6	6	6	4	6	5	6	6	6	6	6	3	5	6	3	2	5	6	6	6	6	6	6	2	6	2	2	6	2	6	6	6	6	2	2	first-degree certificate	Male	43	Rural	unspecified duration
2020-05-08 12:10:51	1120	2	5	7	3	5	6	5	5	7	6	7	6	5	5	5	5	5	6	6	7	6	5	7	7	6	4	4	4	6	6	5	7	3	3	7	3	6	first-degree certificate	Male	54	Rural	unspecified duration
2020-04-21 11:03:29	811	2	4	4	4	4	3	3	4	4	5	5	5	4	4	4	5	4	4	5	4	4	5	5	4	4	5	4	4	4	4	5	4	4	4	4	4	4	first-degree certificate	Male	44	Rural	unspecified duration
2020-04-23 22:48:07	924	2	7	7	7	6	6	7	5	5	5	5	5	5	4	4	2	2	1	6	7	6	5	5	7	7	2	1	6	4	6	1	7	7	7	7	4	4	Ph.D. degree	Male	57	Rural	unspecified duration
2020-04-06 12:27:48	285	1	7	7	7	7	4	7	7	7	7	7	7	7	1	1	7	1	1	1	7	7	7	7	7	7	1	1	1	1	1	4	7	7	7	7	1	1	early-stage	Female	29	Urban	unspecified duration
2020-04-05 14:23:53	229	1	7	7	6	6	2	6	7	7	7	7	7	7	1	5	2	7	1	1	6	7	7	7	7	7	1	1	1	1	1	1	7	6	7	7	2	1	early-stage	Female	35	Urban	unspecified duration
2020-04-04 18:39:25	24	1	6	6	5	5	6	7	4	6	6	7	6	7	3	1	1	1	1	1	7	7	7	7	7	6	1	1	1	1	1	1	7	7	7	7	1	1	early-stage	Female	21	Urban	unspecified duration
2020-04-04 18:41:06	27	1	6	7	7	6	5	7	7	6	7	7	6	7	1	1	1	6	1	4	6	7	7	7	7	6	1	1	6	1	1	1	7	7	7	7	1	1	early-stage	Female	42	Urban	unspecified duration
2020-04-04 18:32:33	20	1	6	7	7	7	6	6	7	5	7	7	6	6	1	2	4	2	2	1	6	6	6	7	7	7	1	1	1	1	2	4	7	7	7	7	2	2	early-stage	Female	37	Urban	unspecified duration
2020-04-05 12:54:41	207	1	4	6	4	4	5	5	6	5	5	5	5	5	3	4	5	3	3	2	5	5	5	5	5	5	3	3	5	2	3	3	5	5	5	5	1	2	early-stage	Female	30	Urban	unspecified duration
2020-04-06 09:51:38	273	1	5	6	4	5	5	6	4	5	5	6	5	5	5	1	5	5	2	6	4	7	4	6	7	6	5	5	7	5	3	3	5	4	6	7	5	2	early-stage	Female	40	Urban	unspecified duration
2020-04-04 20:34:32	64	1	3	7	3	7	7	3	7	7	3	5	7	1	5	1	4	6	5	7	7	7	3	7	7	7	1	7	7	5	7	3	7	7	1	6	5	1	early-stage	Female	32	Urban	unspecified duration
2020-04-05 14:50:38	231	1	3	4	1	2	1	3	4	4	3	2	2	4	4	3	3	6	7	6	4	4	2	3	4	4	2	3	5	7	7	5	5	2	5	6	6	7	early-stage	Female	29	Urban	unspecified duration
2020-04-04 19:55:54	58	1	5	5	5	5	6	5	5	6	5	7	7	6	6	4	5	5	4	5	5	5	6	7	6	6	6	6	6	6	3	4	5	6	5	5	5	5	early-stage	Female	25	Urban	unspecified duration
2020-04-05 16:37:57	246	1	6	6	5	6	6	5	4	5	4	5	6	5	2	2	4	2	5	6	1	6	1	6	7	6	6	4	6	6	6	6	7	6	6	6	5	6	early-stage	Female	31	Urban	unspecified duration
2020-04-06 11:12:50	275	1	4	3	2	3	5	4	4	6	4	5	5	5	5	2	4	3	4	4	5	5	4	5	6	5	4	3	5	6	4	4	3	4	5	5	4	2	early-stage	Female	33	Urban	unspecified duration
2020-04-10 10:14:55	375	1	3	7	7	7	2	6	7	7	7	7	7	5	3	3	7	1	1	2	7	7	2	7	7	7	1	1	2	1	2	5	5	7	7	7	1	1	early-stage	Female	21	Urban	unspecified duration
2020-04-10 10:18:01	376	1	3	3	3	3	2	4	3	3	2	4	4	4	3	4	2	3	1	4	5	4	4	3	4	5	4	3	3	3	2	1	3	3	4	4	3	2	early-stage	Female	21	Urban	unspecified duration
2020-04-07 16:40:29	315	1	1	2	1	1	7	2	2	2	4	2	2	4	7	7	2	6	6	6	4	2	2	2	6	2	7	7	6	6	7	7	1	2	2	2	7	7	early-stage	Female	49	Urban	unspecified duration
2020-04-10 10:20:12	379	1	3	6	3	2	7	3	2	1	2	2	2	2	7	7	7	7	5	7	6	5	6	6	7	7	7	7	7	7	7	7	4	1	2	1	7	7	early-stage	Female	24	Urban	unspecified duration
2020-04-07 00:37:24	303	1	2	1	1	2	6	5	1	5	1	5	5	5	6	6	4	5	6	6	6	4	5	6	6	6	6	5	6	6	6	6	1	1	1	4	4	6	early-stage	Female	28	Urban	unspecified duration
2020-04-11 15:36:16	410	1	3	6	5	7	5	4	4	7	5	7	7	7	5	4	1	1	5	5	7	5	3	7	7	7	4	5	5	7	4	7	3	7	3	7	5	1	early-stage	Female	22	Urban	unspecified duration
2020-04-28 01:23:48	1083	2	7	7	5	7	6	4	6	6	4	4	6	6	6	1	7	5	5	5	5	7	5	5	7	5	5	5	5	5	5	5	3	3	3	3	5	5	early-stage	Female	37	Urban	unspecified duration
2020-04-23 21:13:58	922	2	6	7	7	6	5	7	7	6	7	7	6	7	1	1	1	6	1	4	6	7	7	7	7	6	1	1	6	1	1	1	7	7	7	7	1	1	early-stage	Female	42	Urban	unspecified duration
2020-04-16 20:51:16	617	2	7	7	7	7	5	7	4	7	7	7	7	7	2	2	2	2	2	2	6	7	6	6	7	7	2	2	2	2	2	3	7	6	7	7	2	2	early-stage	Female	30	Urban	unspecified duration
2020-04-16 21:25:57	642	2	5	5	4	5	6	6	4	6	4	5	5	5	5	4	4	4	4	5	6	6	6	6	6	5	4	5	5	3	4	4	5	4	5	5	4	3	early-stage	Female	43	Urban	unspecified duration
2020-04-21 18:50:25	851	2	5	6	5	5	7	3	6	7	5	7	7	6	4	5	5	2	2	2	5	4	5	4	7	6	6	1	2	6	5	2	3	4	4	4	4	7	early-stage	Female	35	Urban	unspecified duration
2020-04-25 17:23:21	1050	2	4	6	4	5	5	6	5	6	5	6	5	5	6	6	7	7	7	6	6	5	5	4	7	4	5	6	6	6	6	7	6	5	5	5	6	7	early-stage	Female	34	Urban	unspecified duration
2020-04-17 07:53:04	702	2	5	5	3	3	6	5	2	2	2	3	2	2	6	7	6	5	4	6	6	6	1	1	7	2	2	2	2	2	2	5	3	2	2	3	4	4	early-stage	Female	34	Urban	unspecified duration
2020-04-22 14:09:47	888	2	6	5	4	5	4	1	4	7	4	7	7	7	1	1	1	1	1	1	4	4	1	5	7	7	1	1	1	1	1	1	1	4	3	3	3	3	early-stage	Female	31	Urban	unspecified duration
2020-04-25 00:23:11	986	2	1	1	2	1	6	3	1	1	1	1	1	1	5	6	6	6	6	6	1	1	1	1	1	1	6	7	6	6	6	6	1	1	1	1	4	4	early-stage	Female	26	Urban	unspecified duration
2020-04-04 22:53:50	87	1	7	7	6	6	2	1	7	7	7	7	7	7	3	1	1	1	1	1	7	7	1	7	7	7	1	1	1	1	1	1	7	5	5	7	2	1	definitive	Female	32	Urban	unspecified duration
2020-04-04 20:19:10	62	1	7	4	6	5	7	5	5	7	1	7	7	7	7	4	1	1	5	7	7	7	7	7	7	7	5	1	5	5	1	1	1	1	1	7	1	1	definitive	Female	38	Urban	unspecified duration
2020-04-05 12:32:02	204	1	6	6	5	6	5	5	5	6	5	7	7	5	7	5	7	5	5	6	7	6	7	7	7	7	5	4	5	6	6	6	4	4	5	7	4	4	definitive	Female	29	Urban	unspecified duration
2020-04-14 12:34:11	491	1	6	5	4	4	4	4	4	6	4	7	5	4	4	4	6	4	4	5	4	6	2	4	6	4	4	4	4	6	6	6	4	4	4	6	2	2	definitive	Female	24	Urban	unspecified duration
2020-04-07 12:17:57	307	1	5	5	2	5	6	4	4	5	2	2	4	6	6	1	1	5	6	7	7	4	6	5	7	7	5	3	5	6	5	1	6	2	4	6	2	3	definitive	Female	33	Urban	unspecified duration
2020-04-04 21:36:55	73	1	4	5	3	2	5	4	5	5	1	5	7	6	5	6	5	4	2	6	6	7	7	6	6	7	5	6	7	5	4	5	7	4	6	6	5	4	definitive	Female	37	Urban	unspecified duration
2020-04-06 19:53:42	291	1	7	6	6	7	5	6	1	7	1	7	7	7	6	1	6	2	6	7	7	7	7	7	7	7	1	1	4	1	1	7	7	4	4	4	1	1	definitive	Female	30	Urban	unspecified duration
2020-04-12 01:50:37	430	1	7	7	5	5	5	5	7	7	6	7	5	5	5	4	5	2	1	7	5	6	1	1	7	4	2	1	4	3	5	1	7	5	6	6	4	1	definitive	Female	42	Urban	unspecified duration
2020-04-05 23:19:43	260	1	6	6	5	6	7	6	6	7	6	7	7	7	7	5	4	4	2	7	7	6	7	7	7	7	6	4	4	6	3	3	7	4	5	6	4	6	definitive	Female	26	Urban	unspecified duration
2020-04-10 20:38:54	390	1	6	7	5	5	5	6	7	6	4	6	5	5	5	5	6	4	3	4	5	7	5	5	6	6	6	5	6	4	5	7	6	6	6	7	5	5	definitive	Female	45	Urban	unspecified duration
2020-04-06 00:25:13	265	1	5	5	4	5	4	5	5	6	4	7	7	6	2	2	4	2	2	5	5	5	5	5	7	6	4	2	3	3	3	6	6	5	5	7	2	5	definitive	Female	40	Urban	unspecified duration
2020-04-04 23:32:39	91	1	2	5	7	2	7	7	4	7	3	7	7	7	6	2	7	1	1	7	6	5	5	5	6	5	3	1	2	5	1	7	6	4	5	5	1	1	definitive	Female	38	Urban	unspecified duration
2020-04-07 18:22:17	322	1	6	6	5	5	6	7	6	7	2	7	7	7	4	1	6	1	1	6	6	6	4	7	7	6	5	1	2	2	1	6	5	5	6	7	1	1	definitive	Female	29	Urban	unspecified duration
2020-04-05 00:19:29	96	1	5	7	5	6	4	7	6	6	5	6	6	6	4	2	2	1	1	4	6	6	6	6	7	7	2	2	2	2	2	2	7	7	7	7	2	2	definitive	Female	37	Urban	unspecified duration
2020-04-07 17:12:25	318	1	5	4	6	5	7	6	5	7	5	7	6	7	5	3	4	2	1	3	7	7	3	7	7	7	2	1	1	1	1	2	3	1	3	3	2	2	definitive	Female	25	Urban	unspecified duration
2020-04-04 21:30:24	72	1	7	6	5	5	4	7	4	6	4	6	6	6	4	6	4	4	1	4	5	5	3	5	7	6	3	3	6	5	6	4	5	1	2	6	6	4	definitive	Female	45	Urban	unspecified duration
2020-04-08 21:13:52	350	1	4	2	2	3	6	1	4	4	4	5	6	5	6	6	1	4	4	6	6	4	5	5	5	5	2	6	7	7	7	3	1	3	3	1	3	6	definitive	Female	40	Urban	unspecified duration
2020-04-04 20:49:05	68	1	3	4	3	5	7	5	3	6	2	6	5	5	7	5	7	5	5	7	5	4	4	6	7	4	6	3	4	5	5	7	4	2	4	4	5	4	definitive	Female	39	Urban	unspecified duration
2020-04-05 07:24:25	121	1	2	4	3	5	7	5	2	4	2	3	2	2	1	6	2	2	5	7	6	4	1	3	5	3	6	6	6	2	2	1	2	1	2	2	3	2	definitive	Female	48	Urban	unspecified duration
2020-04-10 10:26:41	381	1	5	6	4	5	6	7	4	7	6	5	6	7	5	2	1	2	1	6	5	5	3	4	7	4	5	3	5	2	4	1	5	2	1	3	5	3	definitive	Female	22	Urban	unspecified duration
2020-04-07 21:38:58	329	1	4	5	2	3	4	3	4	6	4	4	4	4	4	4	1	4	5	5	6	4	2	2	4	6	4	4	4	2	3	1	5	5	4	5	5	3	definitive	Female	36	Urban	unspecified duration
2020-04-13 21:32:20	458	1	5	2	2	3	7	5	4	6	3	6	7	6	7	3	6	2	2	6	5	5	5	6	7	5	6	6	6	6	5	6	2	2	4	4	4	6	definitive	Female	29	Urban	unspecified duration
2020-04-05 12:15:25	199	1	5	3	3	5	5	5	3	3	3	3	5	5	6	7	7	6	6	6	6	5	6	6	7	5	6	5	5	3	5	6	6	5	5	5	6	6	definitive	Female	23	Urban	unspecified duration
2020-04-05 10:51:15	178	1	3	3	2	3	1	2	2	2	2	2	2	3	1	2	2	2	1	1	2	3	2	3	3	2	1	2	2	2	2	1	3	2	2	2	2	2	definitive	Female	48	Urban	unspecified duration
2020-04-05 11:15:06	185	1	4	7	6	4	6	6	5	6	5	6	6	6	7	6	7	3	4	5	7	6	7	4	7	5	4	7	7	7	7	7	1	7	1	4	7	7	definitive	Female	42	Urban	unspecified duration
2020-04-05 11:55:27	195	1	2	3	3	5	6	5	5	6	2	2	4	4	6	6	2	5	5	7	6	4	2	2	6	4	6	6	6	5	6	4	4	2	6	6	7	7	definitive	Female	37	Urban	unspecified duration
2020-04-05 14:57:37	232	1	5	2	2	5	6	5	2	6	2	4	3	5	6	6	6	6	6	6	6	5	6	6	6	6	6	3	6	6	6	6	2	2	2	6	6	6	definitive	Female	35	Urban	unspecified duration
2020-04-13 20:37:28	452	1	4	1	1	1	7	2	1	6	1	3	3	3	7	7	7	6	7	7	7	1	3	1	7	4	7	7	7	7	7	7	1	1	3	1	7	7	definitive	Female	25	Urban	unspecified duration
2020-04-13 21:09:49	455	1	4	1	1	1	7	2	1	6	1	3	3	3	7	7	7	6	7	7	7	1	3	1	7	4	7	7	7	7	7	7	1	1	3	1	7	7	definitive	Female	25	Urban	unspecified duration
2020-04-04 19:27:17	49	1	4	1	2	2	7	3	3	7	1	1	7	7	7	7	3	3	7	7	7	3	5	7	7	4	4	7	6	3	7	4	1	1	1	5	7	7	definitive	Female	25	Urban	unspecified duration
2020-04-05 07:52:04	126	1	3	1	1	1	1	1	1	2	1	2	2	1	1	1	1	1	1	1	3	2	3	1	1	2	3	7	7	1	1	7	1	1	1	1	7	7	definitive	Female	36	Urban	unspecified duration
2020-04-25 12:07:06	1009	2	7	7	7	7	1	7	7	7	7	7	7	7	1	1	7	1	1	1	7	7	7	7	7	7	1	1	1	1	1	7	7	7	7	7	1	1	definitive	Female	42	Urban	unspecified duration
2020-04-24 21:22:58	938	2	7	7	5	5	3	5	7	7	7	7	7	7	1	1	3	1	1	1	4	7	6	7	7	6	1	1	2	1	1	1	7	7	7	6	1	1	definitive	Female	25	Urban	unspecified duration
2020-04-24 21:18:34	936	2	6	7	6	7	1	7	6	7	7	7	7	7	1	1	7	1	1	1	7	7	7	7	7	7	1	1	1	1	7	1	7	7	7	7	2	1	definitive	Female	41	Urban	unspecified duration
2020-05-06 18:31:49	1115	2	7	7	6	7	2	6	6	7	6	7	7	7	1	2	4	2	1	1	7	7	7	7	7	7	1	1	1	1	2	7	7	7	6	7	1	1	definitive	Female	41	Urban	unspecified duration
2020-04-17 14:35:07	754	2	6	5	5	7	1	6	6	7	6	7	7	2	2	4	6	4	1	1	6	7	5	5	5	5	4	3	4	4	1	3	7	7	7	7	6	5	definitive	Female	32	Urban	unspecified duration
2020-04-22 21:26:47	904	2	6	5	5	7	1	6	6	7	6	7	7	2	2	4	6	4	1	1	6	7	5	5	5	5	4	3	4	4	1	3	7	7	7	7	6	5	definitive	Female	32	Urban	unspecified duration
2020-04-22 21:39:21	905	2	6	5	5	7	1	6	6	7	6	7	7	2	2	4	6	4	1	1	6	7	5	5	5	5	4	3	4	4	1	3	7	7	7	7	6	5	definitive	Female	32	Urban	unspecified duration
2020-04-22 21:40:53	906	2	6	5	5	7	1	6	6	7	6	7	7	2	2	4	6	4	1	1	6	7	5	5	5	5	4	3	4	4	1	3	7	7	7	7	6	5	definitive	Female	32	Urban	unspecified duration
2020-04-23 17:57:29	918	2	6	5	5	7	1	6	6	7	6	7	7	2	2	4	6	4	1	1	6	7	5	5	5	5	4	3	4	4	1	3	7	7	7	7	6	5	definitive	Female	32	Urban	unspecified duration
2020-04-23 20:39:21	919	2	6	5	5	7	1	6	6	7	6	7	7	2	2	4	6	4	1	1	6	7	5	5	5	5	4	3	4	4	1	3	7	7	7	7	6	5	definitive	Female	32	Urban	unspecified duration
2020-04-23 21:01:21	920	2	6	5	5	7	1	6	6	7	6	7	7	2	2	4	6	4	1	1	6	7	5	5	5	5	4	3	4	4	1	3	7	7	7	7	6	5	definitive	Female	32	Urban	unspecified duration
2020-04-24 15:32:08	927	2	6	5	5	7	1	6	6	7	6	7	7	2	2	4	6	4	1	1	6	7	5	5	5	5	4	3	4	4	1	3	7	7	7	7	6	5	definitive	Female	32	Urban	unspecified duration
2020-04-17 14:36:08	755	2	5	5	5	5	2	5	5	6	6	6	6	7	3	3	7	2	2	2	7	7	7	7	7	7	2	2	2	2	2	7	7	7	7	7	2	2	definitive	Female	43	Urban	unspecified duration
2020-04-28 20:04:17	1088	2	6	7	6	7	5	7	7	6	7	7	7	6	2	1	5	2	2	2	7	7	7	7	7	7	5	2	4	2	2	2	7	7	7	7	2	2	definitive	Female	20	Urban	unspecified duration
2020-04-16 22:16:10	668	2	6	6	5	6	2	6	6	6	6	6	6	6	2	2	2	2	2	6	6	6	6	6	6	6	2	2	2	6	2	2	6	2	2	6	2	2	definitive	Female	41	Urban	unspecified duration
2020-04-16 19:27:04	570	2	6	6	6	6	1	5	6	6	6	6	6	6	2	1	1	1	1	2	6	6	6	6	6	6	1	1	1	1	1	1	6	6	6	6	1	1	definitive	Female	24	Urban	unspecified duration
2020-04-17 08:17:37	703	2	6	6	6	6	1	5	6	6	6	6	6	6	2	1	1	1	1	2	6	6	6	6	6	6	1	1	1	1	1	1	6	6	6	6	1	1	definitive	Female	24	Urban	unspecified duration
2020-04-23 10:49:25	913	2	6	7	5	6	5	5	6	7	6	6	6	7	4	2	3	2	2	4	7	6	6	6	6	7	2	1	2	1	2	1	6	6	6	7	5	4	definitive	Female	44	Urban	unspecified duration
2020-04-25 17:35:14	1051	2	6	7	5	4	5	5	5	7	6	4	6	5	2	4	1	2	1	2	6	7	6	6	7	6	1	2	3	3	1	1	7	3	5	6	2	2	definitive	Female	27	Urban	unspecified duration
2020-04-16 22:52:18	681	2	7	7	6	7	6	6	7	6	5	6	5	7	6	5	2	2	2	3	5	7	6	6	7	6	3	5	5	2	5	2	6	5	6	6	2	2	definitive	Female	51	Urban	unspecified duration
2020-04-24 22:06:53	952	2	4	6	6	7	5	6	5	7	5	6	5	5	4	2	7	6	7	2	2	6	7	6	7	6	6	7	2	2	7	6	6	2	5	7	3	3	definitive	Female	30	Urban	unspecified duration
2020-04-25 10:01:55	997	2	6	5	5	5	3	3	3	7	2	7	7	7	4	7	1	2	2	3	6	6	6	6	7	7	5	5	4	7	7	3	6	7	7	7	5	5	definitive	Female	25	Urban	unspecified duration
2020-04-17 09:48:37	718	2	6	6	7	6	1	4	7	7	7	7	7	6	1	1	7	3	1	1	7	6	7	6	6	6	1	3	4	2	5	6	7	4	5	5	2	2	definitive	Female	33	Urban	unspecified duration
2020-04-16 21:57:58	660	2	5	6	6	7	2	6	4	6	7	6	6	7	2	2	7	5	1	5	7	7	7	6	7	6	2	4	4	1	2	6	6	4	5	4	4	3	definitive	Female	37	Urban	unspecified duration
2020-04-16 19:41:29	581	2	6	6	5	4	7	5	3	6	7	5	6	5	5	4	1	3	2	5	6	6	6	6	7	6	4	1	5	4	3	1	6	3	7	7	4	1	definitive	Female	42	Urban	unspecified duration
2020-04-24 23:53:21	983	2	6	6	6	6	3	7	6	6	6	6	6	6	3	3	2	2	2	4	5	6	5	6	7	6	2	2	2	2	6	4	7	6	6	7	3	3	definitive	Female	22	Urban	unspecified duration
2020-04-17 12:14:41	742	2	2	6	5	5	6	4	6	6	6	5	3	3	4	2	6	2	4	6	6	6	2	2	6	6	6	5	6	6	6	4	4	6	5	6	6	5	definitive	Female	26	Urban	unspecified duration
2020-04-24 23:01:23	973	2	5	6	5	5	5	5	6	6	5	5	5	5	5	5	7	7	5	5	5	6	6	6	7	6	6	6	6	6	7	5	7	5	6	5	6	6	definitive	Female	29	Urban	unspecified duration
2020-04-16 20:01:26	586	2	6	6	6	6	5	5	5	7	5	7	7	7	2	2	5	2	2	2	6	6	6	6	6	6	2	2	4	2	2	5	7	4	5	6	2	2	definitive	Female	31	Urban	unspecified duration
2020-04-21 18:55:45	852	2	4	3	1	3	3	2	3	7	5	7	7	5	6	1	6	6	3	6	6	7	5	6	7	6	6	6	6	7	6	6	6	5	7	7	6	5	definitive	Female	24	Urban	unspecified duration
2020-04-24 22:51:01	969	2	4	5	4	5	7	6	4	3	4	4	5	4	6	6	7	5	5	6	6	5	6	6	6	6	6	6	7	7	7	7	5	6	5	5	6	7	definitive	Female	50	Urban	unspecified duration
2020-04-21 19:32:26	853	2	5	4	3	4	4	4	4	6	4	3	3	4	4	6	1	5	3	4	5	5	4	3	4	3	5	6	6	6	6	4	4	4	4	5	5	5	definitive	Female	39	Urban	unspecified duration
2020-04-25 10:17:42	998	2	5	6	3	4	4	3	4	3	4	3	4	3	6	6	6	5	5	7	6	5	3	3	3	5	6	5	5	6	5	5	6	5	5	5	5	5	definitive	Female	42	Urban	unspecified duration
2020-04-27 16:00:23	1080	2	5	5	1	5	5	5	5	5	2	5	5	5	5	5	5	5	5	2	5	5	2	6	6	6	5	5	5	5	5	5	6	2	2	6	2	5	definitive	Female	30	Urban	unspecified duration
2020-04-22 14:32:44	889	2	4	5	2	4	6	4	4	3	1	5	4	5	4	7	4	1	4	5	6	4	1	4	7	6	6	5	5	4	5	6	5	3	3	5	4	7	definitive	Female	34	Urban	unspecified duration
2020-04-20 19:27:08	787	2	5	3	4	4	5	3	3	6	5	6	5	5	5	4	4	5	4	5	5	4	5	5	5	5	4	4	5	4	3	4	4	3	3	5	4	4	definitive	Female	25	Urban	unspecified duration
2020-04-17 11:58:35	739	2	6	6	5	5	7	4	5	5	4	5	5	5	4	4	7	7	5	7	7	5	5	5	6	6	7	5	7	7	7	2	2	2	2	5	4	7	definitive	Female	30	Urban	unspecified duration
2020-04-22 16:00:18	897	2	5	7	5	5	4	4	5	5	4	3	6	4	3	2	6	1	1	1	7	6	5	6	6	5	5	5	7	7	4	7	7	5	6	6	6	5	definitive	Female	45	Urban	unspecified duration
2020-04-21 16:12:49	841	2	6	7	5	6	2	4	4	7	4	1	7	6	7	5	4	3	4	4	4	6	7	7	7	7	6	5	4	2	5	6	7	6	6	6	2	5	definitive	Female	42	Urban	unspecified duration
2020-04-21 10:26:43	799	2	6	5	4	6	2	4	2	5	4	5	4	4	2	4	5	2	2	2	6	6	6	6	6	6	2	4	4	2	5	4	4	2	2	5	4	2	definitive	Female	56	Urban	unspecified duration
2020-04-21 16:45:39	842	2	6	5	4	6	2	4	2	5	4	5	4	4	2	4	5	2	2	2	6	6	6	6	6	6	2	4	4	2	5	4	4	2	2	5	4	2	definitive	Female	56	Urban	unspecified duration
2020-04-22 17:30:05	898	2	6	5	4	6	2	4	2	5	4	5	4	4	2	4	5	2	2	2	6	6	6	6	6	6	2	4	4	2	5	4	4	2	2	5	4	2	definitive	Female	56	Urban	unspecified duration
2020-04-22 18:28:19	901	2	6	5	4	6	2	4	2	5	4	5	4	4	2	4	5	2	2	2	6	6	6	6	6	6	2	4	4	2	5	4	4	2	2	5	4	2	definitive	Female	56	Urban	unspecified duration
2020-04-22 22:04:44	907	2	6	5	4	6	2	4	2	5	4	5	4	4	2	4	5	2	2	2	6	6	6	6	6	6	2	4	4	2	5	4	4	2	2	5	4	2	definitive	Female	56	Urban	unspecified duration
2020-04-23 10:08:25	910	2	6	5	4	6	2	4	2	5	4	5	4	4	2	4	5	2	2	2	6	6	6	6	6	6	2	4	4	2	5	4	4	2	2	5	4	2	definitive	Female	56	Urban	unspecified duration
2020-04-27 00:30:05	1073	2	6	5	2	3	5	5	3	5	2	5	5	5	5	5	5	2	5	5	5	5	5	5	5	5	5	5	5	5	2	5	2	2	2	5	2	5	definitive	Female	41	Urban	unspecified duration
2020-04-16 18:45:15	549	2	5	7	5	5	6	4	2	6	2	6	5	6	6	2	5	2	2	6	6	4	5	6	6	7	4	2	5	5	2	3	5	3	3	3	3	3	definitive	Female	28	Urban	unspecified duration
2020-04-16 21:12:23	631	2	4	7	7	5	6	7	2	7	1	7	7	7	1	1	7	1	1	5	4	6	3	4	7	7	1	1	2	1	2	7	7	4	4	5	2	1	definitive	Female	44	Urban	unspecified duration
2020-05-08 21:14:28	1121	2	5	6	4	5	5	6	1	6	1	6	5	7	7	5	6	1	3	6	6	6	3	7	7	4	5	1	4	6	3	5	5	3	5	3	5	3	definitive	Female	42	Urban	unspecified duration
2020-04-16 13:51:21	534	2	7	7	7	7	5	7	7	7	7	7	7	7	3	4	2	1	1	3	7	7	7	7	7	7	1	1	1	2	1	1	7	7	7	7	4	3	definitive	Female	35	Urban	unspecified duration
2020-04-16 22:13:00	667	2	6	7	2	6	3	4	6	6	6	5	5	5	5	4	4	4	3	5	4	5	6	7	7	7	7	7	7	2	5	3	3	4	4	2	5	5	definitive	Female	50	Urban	unspecified duration
2020-04-16 19:00:36	553	2	6	6	5	5	6	6	6	6	5	6	6	6	4	5	5	2	2	7	7	6	4	6	6	7	4	1	6	3	2	2	5	2	6	4	5	2	definitive	Female	26	Urban	unspecified duration
2020-04-17 11:14:39	734	2	6	7	5	5	7	7	2	6	5	7	7	7	5	2	7	2	2	5	7	5	6	6	7	7	5	5	6	2	1	1	7	5	6	6	2	1	definitive	Female	37	Urban	unspecified duration
2020-04-24 21:23:37	939	2	6	6	4	3	6	3	4	5	3	4	5	7	6	6	5	5	3	7	5	5	5	7	7	5	7	3	6	7	5	5	3	5	7	6	7	7	definitive	Female	24	Urban	unspecified duration
2020-04-25 15:23:32	1036	2	4	3	2	2	6	4	2	3	2	7	5	5	6	5	6	6	5	7	7	5	6	6	6	6	7	6	6	5	6	6	2	2	3	5	6	6	definitive	Female	23	Urban	unspecified duration
2020-04-16 23:04:38	684	2	2	3	1	1	4	4	2	3	1	6	2	3	4	6	6	5	6	6	7	5	4	1	1	3	4	4	4	6	6	7	6	5	7	7	3	6	definitive	Female	26	Urban	unspecified duration
2020-04-22 10:53:36	861	2	6	7	7	6	5	5	7	7	7	7	7	7	4	4	1	2	3	5	7	7	5	7	7	5	1	1	2	2	3	1	6	5	4	5	3	3	definitive	Female	24	Urban	unspecified duration
2020-04-16 21:38:24	649	2	2	6	3	3	6	5	6	6	4	4	4	5	6	3	5	4	3	6	5	4	4	5	6	4	5	4	5	4	5	2	5	3	4	3	4	5	definitive	Female	45	Urban	unspecified duration
2020-04-24 21:53:37	945	2	3	4	3	2	5	6	3	6	3	5	3	3	7	6	4	2	4	5	5	6	2	3	7	3	6	5	4	6	6	3	3	4	4	2	2	3	definitive	Female	25	Urban	unspecified duration
2020-04-24 21:53:44	946	2	3	4	3	2	5	6	3	6	3	5	3	3	7	6	4	2	4	5	5	6	2	3	7	3	6	5	4	6	6	3	3	4	4	2	2	3	definitive	Female	25	Urban	unspecified duration
2020-04-23 10:31:28	911	2	2	2	3	3	3	2	2	3	2	3	3	3	2	2	3	2	1	3	3	3	2	2	3	3	3	2	2	2	1	2	2	3	3	3	2	2	definitive	Female	32	Urban	unspecified duration
2020-05-02 13:45:38	1091	2	4	5	4	5	7	5	3	7	1	7	6	6	5	1	4	1	4	1	7	6	6	6	7	6	1	1	4	1	3	5	5	4	5	5	1	3	definitive	Female	25	Urban	unspecified duration
2020-04-24 22:37:48	964	2	2	1	1	1	7	7	1	3	1	4	4	3	7	7	5	3	7	7	5	5	5	5	6	5	7	6	6	7	7	2	2	2	2	2	4	7	definitive	Female	29	Urban	unspecified duration
2020-04-22 12:32:35	878	2	7	7	7	7	1	4	7	7	7	7	7	7	1	5	7	1	1	1	7	7	4	4	7	7	1	1	1	1	1	4	7	6	7	7	1	1	definitive	Female	41	Urban	unspecified duration
2020-04-24 23:07:51	975	2	4	2	2	2	7	2	2	2	2	3	2	1	7	7	1	7	7	7	2	2	2	2	2	2	7	7	7	7	7	7	1	1	2	2	7	7	definitive	Female	28	Urban	unspecified duration
2020-04-26 09:09:48	1066	2	2	1	2	2	7	1	1	6	1	5	1	1	1	5	6	4	6	7	6	3	3	1	5	6	5	6	7	7	7	7	3	3	5	4	4	6	definitive	Female	45	Urban	unspecified duration
2020-04-22 12:47:25	880	2	1	1	1	1	7	1	1	1	1	1	1	1	7	7	7	7	7	7	6	6	7	7	7	7	7	7	7	7	5	7	1	4	7	3	7	7	definitive	Female	52	Urban	unspecified duration
2020-04-24 22:45:27	967	2	1	1	1	1	1	1	1	1	1	1	1	1	7	7	7	7	7	7	7	1	1	1	1	1	7	7	7	7	7	1	1	1	1	1	1	7	definitive	Female	33	Urban	unspecified duration
2020-04-14 12:11:51	475	1	7	7	7	7	7	7	7	7	7	7	7	7	7	7	7	6	1	7	7	7	7	7	7	7	1	1	6	7	5	7	7	7	7	7	1	1	second-degree certificate	Female	44	Urban	unspecified duration
2020-04-10 22:28:32	399	1	7	7	7	7	2	7	7	7	7	7	7	7	1	1	2	1	2	1	7	7	7	2	7	7	1	1	1	1	2	2	7	7	7	7	1	1	second-degree certificate	Female	39	Urban	unspecified duration
2020-04-13 18:05:14	450	1	7	7	7	7	5	7	7	7	7	7	7	7	1	1	7	7	1	1	7	7	7	7	7	7	1	1	1	1	7	1	7	7	7	7	1	1	second-degree certificate	Female	44	Urban	unspecified duration
2020-04-12 18:14:09	437	1	7	7	5	4	5	5	7	7	7	7	7	7	2	2	2	5	2	2	7	7	7	5	7	6	5	6	6	5	2	1	7	7	7	7	1	1	second-degree certificate	Female	45	Urban	unspecified duration
2020-04-05 12:03:35	198	1	7	7	7	7	1	3	7	7	7	7	7	7	3	1	1	1	1	1	7	7	7	7	7	7	1	1	1	1	1	1	7	7	7	7	1	1	second-degree certificate	Female	35	Urban	unspecified duration
2020-04-06 21:43:52	295	1	5	6	6	6	4	6	6	6	6	6	6	6	3	2	1	1	1	1	5	6	2	3	7	7	1	1	1	1	2	2	5	4	3	7	1	1	second-degree certificate	Female	40	Urban	unspecified duration
2020-04-10 12:36:26	385	1	7	7	6	6	6	6	2	7	3	7	7	7	2	1	7	1	4	4	7	6	7	6	7	7	1	1	1	1	1	7	7	6	6	6	3	3	second-degree certificate	Female	43	Urban	unspecified duration
2020-04-05 10:43:13	176	1	6	6	6	6	1	6	6	5	7	6	5	5	1	6	6	1	1	1	6	6	6	6	6	6	1	1	1	1	2	1	6	4	5	5	1	1	second-degree certificate	Female	41	Urban	unspecified duration
2020-04-07 17:04:33	317	1	3	7	6	6	6	6	7	6	6	7	6	6	7	7	6	6	3	6	6	6	7	6	4	7	6	6	6	3	6	6	6	6	6	6	7	7	second-degree certificate	Female	57	Urban	unspecified duration
2020-04-05 13:03:49	210	1	6	5	5	6	7	7	5	7	5	6	7	7	6	7	3	2	2	6	4	6	3	4	7	5	6	5	6	6	2	2	4	3	4	5	6	1	second-degree certificate	Female	32	Urban	unspecified duration
2020-04-07 20:52:20	326	1	5	6	2	6	7	7	5	6	5	7	4	5	6	5	1	4	2	5	4	7	6	4	6	7	2	7	7	7	2	1	7	5	7	7	7	7	second-degree certificate	Female	34	Urban	unspecified duration
2020-04-09 13:50:41	366	1	6	5	4	4	6	2	4	6	4	7	7	6	7	7	7	2	7	7	6	7	7	6	7	7	6	7	7	6	6	6	1	2	2	1	7	4	second-degree certificate	Female	38	Urban	unspecified duration
2020-04-06 00:56:58	266	1	6	7	5	6	6	4	6	6	3	4	6	6	5	7	5	5	3	3	6	6	6	6	6	6	5	5	6	5	2	5	6	3	6	6	3	2	second-degree certificate	Female	37	Urban	unspecified duration
2020-04-05 07:36:45	123	1	5	5	3	3	5	5	5	7	3	7	7	3	3	5	4	5	1	1	7	7	7	7	7	6	2	1	4	4	5	5	7	2	1	4	1	2	second-degree certificate	Female	40	Urban	unspecified duration
2020-04-05 16:31:09	245	1	7	1	6	4	7	7	4	7	1	7	7	7	4	1	7	1	6	7	5	7	7	7	7	7	1	1	1	4	1	1	7	6	1	7	5	1	second-degree certificate	Female	46	Urban	unspecified duration
2020-04-14 11:58:50	466	1	6	5	2	5	5	6	2	6	1	7	5	7	6	7	1	3	5	6	6	5	6	6	7	6	7	6	7	7	7	7	6	4	5	5	2	5	second-degree certificate	Female	31	Urban	unspecified duration
2020-04-14 15:13:18	502	1	4	2	5	5	7	5	7	5	7	5	4	5	6	4	6	4	4	6	6	4	4	4	6	5	6	6	6	5	6	6	4	4	4	4	6	6	second-degree certificate	Female	52	Urban	unspecified duration
2020-04-08 19:08:16	336	1	3	5	5	3	7	4	5	4	5	5	5	5	7	4	5	4	3	5	6	4	4	3	5	6	4	4	4	5	5	4	5	5	5	5	4	4	second-degree certificate	Female	46	Urban	unspecified duration
2020-04-04 18:47:43	30	1	5	6	4	5	5	4	5	5	5	5	5	5	4	3	2	2	3	4	4	4	4	4	4	5	5	4	4	4	4	3	4	5	4	5	5	4	second-degree certificate	Female	32	Urban	unspecified duration
2020-04-05 07:18:18	120	1	6	5	5	4	4	5	5	6	4	6	4	6	4	6	5	4	3	3	3	3	3	3	7	5	4	4	3	5	5	3	6	5	5	6	4	4	second-degree certificate	Female	35	Urban	unspecified duration
2020-04-08 14:51:55	334	1	7	5	4	7	7	6	5	7	3	7	7	4	5	1	1	4	1	6	2	7	5	7	7	7	2	3	2	5	4	1	7	4	7	7	5	5	second-degree certificate	Female	39	Urban	unspecified duration
2020-04-05 10:48:55	177	1	6	6	4	4	5	5	4	6	3	5	5	4	5	4	4	4	3	7	6	5	2	4	4	6	6	6	6	6	6	1	4	4	4	5	5	4	second-degree certificate	Female	43	Urban	unspecified duration
2020-04-05 19:41:50	253	1	3	5	3	3	3	4	4	6	3	6	3	3	4	6	1	6	5	6	6	3	4	2	5	3	4	6	1	4	6	1	3	5	4	3	1	2	second-degree certificate	Female	40	Urban	unspecified duration
2020-04-05 10:11:23	165	1	6	6	4	6	7	3	3	5	3	4	6	6	5	3	1	2	1	3	4	4	6	5	7	6	2	3	4	4	4	1	7	5	5	6	4	4	second-degree certificate	Female	38	Urban	unspecified duration
2020-04-05 09:07:08	143	1	6	6	5	5	7	5	7	7	1	6	6	7	7	6	1	5	4	7	7	5	6	7	7	7	6	1	6	5	5	1	6	5	6	7	5	5	second-degree certificate	Female	33	Urban	unspecified duration
2020-04-04 22:26:18	81	1	4	2	2	4	7	4	5	7	6	7	7	7	7	7	4	6	7	7	7	5	7	6	7	7	7	7	7	7	4	4	5	3	5	5	7	7	second-degree certificate	Female	35	Urban	unspecified duration
2020-04-11 21:10:40	420	1	4	4	3	5	4	4	5	5	5	5	5	5	5	4	3	3	3	4	4	4	4	4	4	4	4	3	4	4	4	4	4	4	4	4	4	4	second-degree certificate	Female	25	Urban	unspecified duration
2020-04-07 20:48:14	325	1	4	5	1	5	5	7	4	5	4	4	5	6	2	5	1	4	3	4	7	7	7	6	7	7	4	4	4	4	5	3	7	6	6	5	4	4	second-degree certificate	Female	30	Urban	unspecified duration
2020-04-14 13:54:13	498	1	5	4	4	4	4	5	4	7	4	5	5	4	4	3	7	4	3	4	6	5	5	5	7	7	4	7	7	5	5	7	6	4	4	4	3	3	second-degree certificate	Female	41	Urban	unspecified duration
2020-04-07 17:52:57	320	1	4	5	3	4	3	2	4	4	4	4	4	3	4	5	6	6	6	4	5	5	5	5	5	4	6	6	6	6	4	7	7	6	7	7	7	7	second-degree certificate	Female	43	Urban	unspecified duration
2020-04-04 23:26:17	89	1	5	5	1	3	7	6	1	1	1	3	3	5	7	7	7	7	7	7	4	4	2	3	6	3	7	7	7	7	7	7	5	1	3	3	7	7	second-degree certificate	Female	40	Urban	unspecified duration
2020-04-04 22:54:34	88	1	5	2	1	3	4	5	1	7	1	6	7	6	3	2	1	2	3	3	3	4	3	4	5	5	3	1	3	2	2	3	2	3	2	3	2	2	second-degree certificate	Female	33	Urban	unspecified duration
2020-04-14 20:24:47	512	1	5	1	5	5	1	3	1	5	1	3	3	5	5	5	5	5	4	5	7	7	4	1	4	4	6	6	6	5	7	7	1	4	1	3	7	7	second-degree certificate	Female	46	Urban	unspecified duration
2020-04-05 10:11:40	166	1	5	5	5	4	4	4	5	6	4	5	5	5	6	7	4	4	3	5	4	4	6	6	7	6	5	5	6	7	5	3	2	3	2	6	3	4	second-degree certificate	Female	34	Urban	unspecified duration
2020-04-05 10:27:48	170	1	2	5	1	3	3	4	5	6	4	6	5	3	3	4	4	4	3	3	3	3	1	1	6	3	3	3	2	3	3	1	3	1	1	6	4	5	second-degree certificate	Female	40	Urban	unspecified duration
2020-04-14 15:41:53	503	1	5	3	3	3	7	4	3	1	4	1	4	5	6	5	4	5	6	7	6	6	5	6	6	5	4	5	4	5	6	4	5	4	6	5	5	5	second-degree certificate	Female	45	Urban	unspecified duration
2020-04-05 13:46:46	222	1	5	5	5	5	6	5	4	3	3	3	3	3	5	3	4	4	1	1	1	1	3	1	1	1	3	3	1	3	1	1	1	1	1	1	3	3	second-degree certificate	Female	41	Urban	unspecified duration
2020-04-14 15:59:35	506	1	5	5	2	4	6	7	2	6	2	6	6	6	6	6	5	3	5	7	6	3	6	6	6	6	5	3	5	3	5	5	5	6	6	6	6	6	second-degree certificate	Female	41	Urban	unspecified duration
2020-04-05 07:58:57	129	1	2	6	3	5	7	6	6	6	3	6	6	5	7	4	4	5	1	7	1	5	1	5	7	5	7	4	7	4	5	4	7	1	7	5	2	3	second-degree certificate	Female	41	Urban	unspecified duration
2020-04-04 19:59:06	60	1	6	6	6	6	6	6	4	7	3	7	7	7	7	6	1	2	2	6	6	6	5	7	7	7	6	1	4	2	2	5	7	3	6	6	5	3	second-degree certificate	Female	37	Urban	unspecified duration
2020-04-05 13:38:24	221	1	1	1	1	3	7	4	1	7	2	6	7	7	3	2	7	2	2	7	6	6	6	5	5	5	2	2	2	2	2	7	6	3	5	6	2	2	second-degree certificate	Female	42	Urban	unspecified duration
2020-04-08 21:09:49	348	1	2	3	2	3	7	3	1	3	1	3	3	3	7	7	3	1	7	7	5	5	5	3	6	3	7	7	7	7	7	3	5	2	2	5	7	7	second-degree certificate	Female	41	Urban	unspecified duration
2020-04-05 12:55:26	208	1	2	5	1	4	7	1	1	4	1	2	3	2	4	7	2	2	7	7	6	2	6	5	5	5	7	4	7	6	7	7	5	2	3	3	7	7	second-degree certificate	Female	39	Urban	unspecified duration
2020-04-05 08:13:23	133	1	6	7	6	5	1	4	7	6	7	6	6	6	1	1	1	1	1	1	7	7	6	4	7	6	1	1	1	1	1	1	7	5	5	7	1	1	second-degree certificate	Female	37	Urban	unspecified duration
2020-04-05 11:43:12	189	1	6	7	5	5	3	4	5	7	5	7	5	7	3	3	1	1	1	1	7	7	7	1	7	5	1	1	1	1	1	1	3	1	3	3	1	1	second-degree certificate	Female	35	Urban	unspecified duration
2020-04-05 11:43:26	190	1	6	7	5	5	3	4	5	7	5	7	5	7	3	3	1	1	1	1	7	7	7	1	7	5	1	1	1	1	1	1	3	1	3	3	1	1	second-degree certificate	Female	35	Urban	unspecified duration
2020-04-10 22:08:07	397	1	2	5	1	2	1	1	4	4	4	4	4	2	7	5	4	4	3	7	7	4	4	4	4	4	6	6	7	7	7	4	4	4	2	4	7	7	second-degree certificate	Female	31	Urban	unspecified duration
2020-04-07 00:06:34	299	1	3	5	3	5	7	6	4	4	3	3	7	5	5	7	7	7	7	7	7	5	7	5	5	5	7	7	7	7	7	1	7	3	7	7	7	7	second-degree certificate	Female	41	Urban	unspecified duration
2020-04-08 19:34:29	340	1	7	7	5	6	5	7	4	5	1	4	4	3	2	1	1	1	1	1	3	4	3	4	4	3	1	1	1	1	1	2	4	2	2	3	2	1	second-degree certificate	Female	52	Urban	unspecified duration
2020-04-05 16:11:41	241	1	4	5	1	4	3	3	4	6	1	6	5	5	7	5	4	5	5	6	4	5	3	4	6	6	6	4	5	4	5	4	5	3	3	4	2	2	second-degree certificate	Female	47	Urban	unspecified duration
2020-04-05 00:22:00	97	1	2	2	2	1	1	2	2	2	1	2	1	2	1	1	1	1	1	2	2	2	1	1	2	2	1	1	1	1	1	2	2	2	2	2	1	1	second-degree certificate	Female	47	Urban	unspecified duration
2020-04-04 21:59:17	75	1	2	1	2	1	1	1	2	1	1	2	2	2	1	1	2	2	2	1	1	1	1	1	1	1	2	1	1	1	1	2	1	1	1	1	2	1	second-degree certificate	Female	47	Urban	unspecified duration
2020-04-05 00:55:38	102	1	2	5	3	3	7	3	1	3	1	3	1	1	7	3	1	1	3	7	7	3	1	1	1	6	6	6	6	3	3	3	3	4	4	4	4	4	second-degree certificate	Female	35	Urban	unspecified duration
2020-04-05 09:12:39	145	1	2	2	2	2	2	1	1	2	1	3	2	1	1	3	1	1	1	2	2	2	2	2	2	2	2	2	2	2	2	1	2	2	2	3	2	3	second-degree certificate	Female	37	Urban	unspecified duration
2020-04-22 13:58:16	885	2	7	7	6	5	1	7	7	7	7	7	7	6	1	1	2	2	1	1	7	7	7	7	7	6	1	1	1	1	1	1	7	6	6	6	2	1	second-degree certificate	Female	43	Urban	unspecified duration
2020-04-16 21:19:42	638	2	6	6	5	6	1	4	7	7	7	7	7	6	1	1	1	4	2	2	6	6	6	6	6	6	1	1	1	1	1	1	7	7	7	7	1	1	second-degree certificate	Female	33	Urban	unspecified duration
2020-04-22 13:26:00	882	2	7	7	6	7	6	6	5	7	7	7	7	6	5	1	5	1	1	4	7	7	7	7	7	7	1	1	3	3	1	1	6	4	6	7	2	1	second-degree certificate	Female	44	Urban	unspecified duration
2020-04-24 22:23:50	955	2	7	7	6	7	1	7	1	7	7	7	7	7	1	3	5	2	2	5	6	7	6	6	6	5	1	1	1	1	1	5	7	7	7	7	1	1	second-degree certificate	Female	51	Urban	unspecified duration
2020-04-16 22:57:31	682	2	7	7	6	7	2	7	7	6	6	6	6	7	2	2	3	1	1	1	7	7	7	7	7	7	1	1	1	1	2	2	7	7	7	5	1	1	second-degree certificate	Female	30	Urban	unspecified duration
2020-04-16 22:41:44	674	2	6	7	6	5	6	6	6	7	6	7	7	7	2	1	6	1	1	1	6	7	7	7	7	7	1	1	1	1	1	3	6	7	7	7	1	1	second-degree certificate	Female	30	Urban	unspecified duration
2020-04-24 22:33:38	961	2	7	6	6	6	1	6	6	7	6	7	7	7	1	1	2	1	1	1	7	7	7	7	7	7	2	2	1	1	1	2	7	7	7	7	1	1	second-degree certificate	Female	43	Urban	unspecified duration
2020-04-21 10:33:18	803	2	7	7	6	7	4	6	6	6	6	4	6	6	1	1	1	1	1	1	6	6	6	6	7	7	1	1	1	1	1	2	7	6	6	6	1	1	second-degree certificate	Female	39	Urban	unspecified duration
2020-04-25 14:36:31	1023	2	7	7	5	4	1	4	4	6	4	7	7	7	1	1	6	4	1	2	7	6	6	7	7	7	1	1	1	1	1	4	6	6	5	7	1	1	second-degree certificate	Female	43	Urban	unspecified duration
2020-04-16 19:00:57	554	2	6	7	4	6	4	4	4	4	4	4	4	6	4	4	3	3	4	6	6	6	6	6	6	6	1	1	1	1	4	1	6	4	4	4	4	2	second-degree certificate	Female	50	Urban	unspecified duration
2020-04-26 19:49:00	1072	2	5	4	6	6	5	5	3	5	3	7	7	6	5	1	5	1	6	6	6	6	7	7	7	7	1	1	1	5	1	4	7	6	7	7	1	1	second-degree certificate	Female	36	Urban	unspecified duration
2020-04-16 09:25:25	526	2	7	7	7	7	4	6	7	7	7	7	7	7	5	5	5	3	2	6	4	7	7	7	7	7	6	1	2	3	2	2	7	7	7	7	2	6	second-degree certificate	Female	33	Urban	unspecified duration
2020-04-16 20:30:33	603	2	6	7	5	7	4	5	5	7	7	7	7	7	4	2	1	2	1	1	7	7	5	5	7	7	2	1	1	2	2	1	7	7	7	7	2	2	second-degree certificate	Female	40	Urban	unspecified duration
2020-04-17 21:42:43	771	2	5	7	6	6	6	6	6	6	6	6	7	7	4	6	4	4	4	4	6	6	3	3	6	6	6	6	6	5	6	3	6	6	6	6	3	6	second-degree certificate	Female	43	Urban	unspecified duration
2020-04-17 13:49:17	748	2	6	6	6	6	2	6	6	6	6	5	6	6	2	2	2	2	2	2	6	6	6	6	6	6	2	2	2	2	2	2	4	4	4	4	1	1	second-degree certificate	Female	38	Urban	unspecified duration
2020-04-16 19:13:55	563	2	6	6	5	5	3	6	6	7	6	4	6	5	3	4	4	2	2	2	4	6	4	7	7	4	2	2	1	2	5	4	6	5	3	3	2	2	second-degree certificate	Female	29	Urban	unspecified duration
2020-04-17 10:03:58	721	2	5	5	6	6	7	6	6	6	5	5	6	5	4	4	6	7	4	5	6	7	6	6	7	7	5	5	6	5	5	5	7	5	7	6	5	6	second-degree certificate	Female	44	Urban	unspecified duration
2020-04-25 13:37:29	1015	2	6	6	6	6	2	6	6	5	5	6	6	6	2	2	7	2	2	2	6	6	4	2	6	6	2	2	2	2	2	6	5	6	6	6	2	2	second-degree certificate	Female	58	Urban	unspecified duration
2020-04-21 14:16:24	838	2	2	7	6	6	6	5	6	6	5	6	6	5	5	5	2	2	2	5	6	6	6	6	6	6	5	5	6	2	2	1	6	6	6	6	5	5	second-degree certificate	Female	43	Urban	unspecified duration
2020-04-16 20:18:05	596	2	6	6	5	5	5	4	6	7	5	4	7	7	6	3	6	2	2	5	7	7	7	7	7	7	1	1	1	1	7	4	7	7	7	7	1	1	second-degree certificate	Female	41	Urban	unspecified duration
2020-04-26 17:01:28	1068	2	6	6	5	6	4	6	5	7	5	7	5	6	1	2	4	1	1	1	5	4	5	5	6	6	1	1	1	1	5	4	5	4	5	5	5	1	second-degree certificate	Female	40	Urban	unspecified duration
2020-04-24 21:56:26	947	2	6	5	6	6	5	7	4	4	5	7	6	6	3	2	7	6	5	6	7	6	6	6	7	7	6	2	3	6	6	6	5	7	6	7	5	5	second-degree certificate	Female	33	Urban	unspecified duration
2020-04-16 21:17:26	635	2	5	4	5	4	3	5	4	6	4	7	6	6	4	5	6	5	5	5	6	7	7	7	7	7	7	7	7	7	6	6	6	6	7	6	7	6	second-degree certificate	Female	37	Urban	unspecified duration
2020-04-16 20:55:34	619	2	5	6	2	5	5	4	2	1	2	4	5	4	6	6	2	2	2	5	5	5	5	2	5	5	3	3	3	6	6	2	6	6	5	5	4	6	second-degree certificate	Female	42	Urban	unspecified duration
2020-04-17 15:41:54	758	2	6	7	5	6	6	6	6	5	7	5	6	5	1	5	2	4	2	3	5	6	2	4	7	6	2	5	5	2	5	4	6	5	5	5	5	2	second-degree certificate	Female	45	Urban	unspecified duration
2020-04-17 10:27:49	724	2	6	6	5	5	6	6	6	6	6	7	3	3	5	6	2	6	4	5	3	6	2	2	6	2	5	2	6	6	6	6	5	6	5	5	2	5	second-degree certificate	Female	48	Urban	unspecified duration
2020-04-30 11:16:41	1089	2	5	6	5	5	4	4	5	5	5	5	6	6	2	4	4	5	5	4	6	4	6	5	6	6	5	5	5	4	4	5	4	6	6	5	5	5	second-degree certificate	Female	40	Urban	unspecified duration
2020-04-25 10:21:12	1001	2	6	6	7	5	4	4	6	4	4	4	5	6	5	4	6	5	3	3	6	6	6	4	6	6	5	4	6	4	6	6	1	5	5	6	4	6	second-degree certificate	Female	42	Urban	unspecified duration
2020-04-26 17:05:53	1069	2	6	6	7	5	4	4	6	4	4	4	5	6	5	4	6	5	3	3	6	6	6	4	6	6	5	4	6	4	6	6	1	5	5	6	4	6	second-degree certificate	Female	42	Urban	unspecified duration
2020-04-27 11:09:31	1075	2	6	6	7	5	4	4	6	4	4	4	5	6	5	4	6	5	3	3	6	6	6	4	6	6	5	4	6	4	6	6	1	5	5	6	4	6	second-degree certificate	Female	42	Urban	unspecified duration
2020-04-25 12:15:11	1010	2	3	4	4	5	1	2	4	4	4	6	5	5	1	1	1	1	2	2	4	4	4	4	6	4	2	2	2	2	2	4	5	4	4	4	2	2	second-degree certificate	Female	36	Urban	unspecified duration
2020-04-17 10:04:09	722	2	6	5	5	3	6	5	3	5	4	7	7	6	5	2	7	3	2	6	5	6	6	7	7	7	4	1	5	2	1	6	5	3	5	4	6	1	second-degree certificate	Female	31	Urban	unspecified duration
2020-04-28 09:39:45	1085	2	5	5	5	5	6	4	5	5	3	5	5	5	4	5	4	5	5	4	5	4	4	4	4	4	5	5	5	5	5	2	5	4	4	4	5	5	second-degree certificate	Female	52	Urban	unspecified duration
2020-04-24 21:13:38	933	2	4	5	4	4	6	3	4	3	3	3	3	4	4	4	4	5	7	6	6	6	6	5	5	5	5	6	6	5	5	7	5	4	5	4	6	7	second-degree certificate	Female	32	Urban	unspecified duration
2020-04-21 18:19:16	848	2	7	7	5	5	7	5	1	3	3	6	7	3	6	5	7	6	6	7	7	7	7	6	3	4	5	5	5	4	5	6	3	3	3	4	4	6	second-degree certificate	Female	24	Urban	unspecified duration
2020-04-17 08:26:42	704	2	3	5	2	3	3	1	5	7	2	7	6	6	3	4	4	4	4	3	7	6	6	6	5	7	7	4	5	3	5	5	5	5	5	5	5	4	second-degree certificate	Female	37	Urban	unspecified duration
2020-04-22 14:33:28	890	2	5	3	3	5	5	6	2	4	2	4	7	6	6	6	5	3	2	4	6	4	3	7	7	6	6	6	5	6	6	6	7	6	5	7	7	7	second-degree certificate	Female	39	Urban	unspecified duration
2020-04-17 09:13:26	708	2	3	3	1	1	7	4	5	1	1	5	2	2	5	3	2	6	6	7	7	2	3	3	1	4	5	6	6	7	7	1	2	1	2	5	7	6	second-degree certificate	Female	45	Urban	unspecified duration
2020-04-16 21:03:39	625	2	5	7	6	5	5	6	6	6	5	5	5	5	5	4	6	6	2	5	6	6	6	5	7	6	4	5	4	4	4	5	6	4	4	6	4	5	second-degree certificate	Female	40	Urban	unspecified duration
2020-05-05 21:07:26	1109	2	3	4	4	6	6	6	5	5	5	5	5	4	5	5	5	5	2	5	5	5	5	5	5	4	5	4	4	5	5	5	5	3	3	3	3	5	second-degree certificate	Female	46	Urban	unspecified duration
2020-04-16 22:46:37	677	2	6	6	4	4	5	6	4	5	5	5	5	5	4	5	1	1	1	1	5	5	6	4	6	6	5	6	5	4	4	1	4	5	5	5	5	5	second-degree certificate	Female	49	Urban	unspecified duration
2020-04-22 14:05:12	887	2	6	6	5	5	5	7	5	4	4	5	6	6	5	6	6	5	6	6	5	6	2	2	7	7	6	5	7	6	7	4	4	6	6	6	4	4	second-degree certificate	Female	43	Urban	unspecified duration
2020-04-16 21:32:52	647	2	6	6	5	4	7	6	5	6	4	5	5	4	5	3	6	3	1	6	4	6	4	6	7	5	3	3	5	6	6	3	4	6	6	5	3	5	second-degree certificate	Female	36	Urban	unspecified duration
2020-04-25 14:52:18	1028	2	5	4	7	5	7	2	3	7	4	7	7	7	7	6	6	2	7	7	7	1	7	3	7	3	7	1	6	1	7	7	1	1	1	1	7	7	second-degree certificate	Female	24	Urban	unspecified duration
2020-04-25 09:39:36	993	2	5	6	3	4	4	3	2	7	4	7	6	6	4	4	7	6	6	6	7	4	4	7	7	7	4	5	7	7	2	7	5	6	7	6	6	7	second-degree certificate	Female	30	Urban	unspecified duration
2020-04-21 13:37:28	835	2	4	5	1	5	5	4	4	4	3	5	6	5	4	4	4	4	4	4	4	6	4	5	6	4	4	5	5	4	5	4	4	5	4	4	4	4	second-degree certificate	Female	40	Urban	unspecified duration
2020-04-22 15:36:26	896	2	1	2	2	2	1	2	3	6	3	6	6	5	5	5	4	2	2	4	4	4	4	6	6	7	4	4	3	4	1	4	6	6	6	7	2	4	second-degree certificate	Female	38	Urban	unspecified duration
2020-04-24 13:31:02	926	2	2	2	1	2	6	2	1	5	1	5	4	5	6	5	4	5	5	6	6	5	6	6	6	5	5	5	6	5	5	6	4	2	2	3	3	3	second-degree certificate	Female	37	Urban	unspecified duration
2020-04-22 11:59:24	873	2	7	6	5	5	7	7	6	7	6	7	7	7	5	7	5	1	1	7	6	7	7	7	7	7	5	1	5	7	1	1	7	7	7	7	4	5	second-degree certificate	Female	42	Urban	unspecified duration
2020-04-22 13:51:22	884	2	4	5	4	6	5	5	6	7	6	6	7	6	4	5	5	5	2	3	4	5	6	7	7	4	1	1	4	2	2	2	2	7	4	3	3	4	second-degree certificate	Female	30	Urban	unspecified duration
2020-04-16 23:12:25	686	2	6	5	5	5	6	5	3	7	4	6	6	7	6	6	4	3	6	6	7	7	6	4	7	7	2	1	5	5	5	5	7	4	4	5	3	2	second-degree certificate	Female	38	Urban	unspecified duration
2020-04-25 18:45:13	1056	2	3	4	4	4	4	4	4	6	3	6	6	4	5	4	5	4	4	6	5	5	6	5	6	7	5	4	5	5	5	5	4	4	4	4	5	4	second-degree certificate	Female	48	Urban	unspecified duration
2020-04-25 11:43:04	1007	2	3	3	3	3	3	3	3	3	3	3	3	3	1	2	3	2	1	1	2	2	2	2	3	3	1	1	1	1	2	1	3	3	3	3	1	2	second-degree certificate	Female	27	Urban	unspecified duration
2020-04-25 14:38:41	1026	2	5	5	2	2	6	6	6	6	6	5	2	3	5	6	7	6	6	7	3	4	2	5	6	7	6	7	7	7	7	7	4	4	4	5	6	7	second-degree certificate	Female	46	Urban	unspecified duration
2020-04-21 11:53:23	823	2	5	5	5	5	6	5	5	5	5	5	5	5	5	6	6	5	5	5	5	5	6	5	6	5	6	5	6	6	5	7	6	3	3	6	6	7	second-degree certificate	Female	54	Urban	unspecified duration
2020-04-16 20:13:47	592	2	2	7	5	5	5	2	5	5	5	2	2	5	5	5	3	3	3	6	5	5	5	5	2	6	6	5	6	6	6	3	6	6	6	6	6	6	second-degree certificate	Female	37	Urban	unspecified duration
2020-05-06 17:55:50	1113	2	3	3	3	3	5	4	4	3	4	4	3	4	5	4	5	5	4	6	5	4	5	6	5	6	5	5	5	6	6	5	4	4	4	5	5	5	second-degree certificate	Female	50	Urban	unspecified duration
2020-04-25 14:22:23	1021	2	6	6	7	5	6	6	1	2	3	2	6	7	1	1	7	1	4	1	7	7	7	7	7	6	1	1	1	5	2	1	6	5	6	3	2	6	second-degree certificate	Female	46	Urban	unspecified duration
2020-05-09 00:54:14	1122	2	3	4	4	3	3	3	3	4	2	2	2	2	3	2	4	4	3	4	4	3	4	2	3	2	3	4	4	4	4	4	3	3	4	3	3	3	second-degree certificate	Female	30	Urban	unspecified duration
2020-04-25 16:53:40	1047	2	2	2	2	2	7	2	2	2	2	2	2	2	7	6	5	6	6	6	6	2	2	2	2	6	6	6	6	6	6	6	2	2	2	2	2	6	second-degree certificate	Female	35	Urban	unspecified duration
2020-04-25 14:37:53	1025	2	3	2	1	2	2	2	2	2	2	2	2	2	2	1	2	2	2	2	2	3	3	2	3	3	2	2	2	2	1	3	2	2	2	2	2	2	second-degree certificate	Female	32	Urban	unspecified duration
2020-04-16 21:50:49	657	2	5	5	3	2	5	2	1	1	2	4	5	2	6	7	1	6	2	7	1	1	4	2	5	4	6	7	7	7	7	7	5	2	4	5	2	7	second-degree certificate	Female	43	Urban	unspecified duration
2020-04-25 21:37:51	1062	2	3	4	2	2	7	3	2	3	1	5	5	4	6	7	7	3	4	6	1	3	4	5	6	6	7	6	7	7	6	7	2	2	5	7	7	7	second-degree certificate	Female	39	Urban	unspecified duration
2020-04-25 09:19:19	991	2	2	2	2	2	1	1	2	2	2	2	2	2	1	2	2	2	1	1	1	2	2	2	2	2	2	1	1	1	1	2	2	1	2	2	2	2	second-degree certificate	Female	30	Urban	unspecified duration
2020-04-16 23:54:56	692	2	2	1	3	1	4	4	1	4	2	3	3	3	6	3	2	2	3	6	3	2	1	4	6	4	7	7	7	7	7	4	1	2	2	2	4	4	second-degree certificate	Female	46	Urban	unspecified duration
2020-04-24 22:33:10	960	2	1	1	2	2	7	4	1	2	2	2	4	5	7	5	1	5	7	7	6	5	6	4	6	3	5	5	6	7	7	7	2	2	2	2	2	7	second-degree certificate	Female	32	Urban	unspecified duration
2020-04-24 21:47:14	944	2	4	5	4	3	4	4	4	2	1	4	4	2	5	5	5	5	4	5	6	5	4	6	3	5	5	5	5	4	7	3	5	5	5	6	5	7	second-degree certificate	Female	34	Urban	unspecified duration
2020-04-16 20:35:30	605	2	2	2	1	2	2	2	2	2	1	2	2	2	2	2	1	2	1	3	2	2	1	2	3	2	2	3	3	2	3	1	2	2	2	2	2	3	second-degree certificate	Female	45	Urban	unspecified duration
2020-04-17 22:59:16	774	2	1	1	1	2	1	1	2	1	1	1	1	1	2	2	2	2	2	2	1	1	2	2	2	2	2	2	2	2	2	2	1	1	1	1	2	2	second-degree certificate	Female	38	Urban	unspecified duration
2020-04-24 23:45:44	982	2	1	1	5	5	5	1	1	4	1	2	3	3	7	5	6	5	6	4	7	3	3	3	4	6	7	5	7	7	1	7	6	5	5	5	5	5	second-degree certificate	Female	35	Urban	unspecified duration
2020-04-21 10:33:12	802	2	1	1	1	1	7	1	1	1	1	1	1	2	7	7	7	6	6	7	7	2	4	2	6	1	6	6	6	7	7	7	1	1	1	1	7	7	second-degree certificate	Female	41	Urban	unspecified duration
2020-04-16 23:00:40	683	2	1	2	1	1	1	1	1	1	1	1	1	1	1	1	2	2	2	2	1	2	1	1	1	1	1	1	1	1	2	2	1	1	1	1	2	1	second-degree certificate	Female	52	Urban	unspecified duration
2020-04-14 12:55:33	495	1	7	7	7	7	4	7	7	7	7	7	7	7	1	1	1	1	1	7	7	7	7	7	7	7	1	1	1	1	1	2	7	7	7	7	1	1	first-degree certificate	Female	48	Urban	unspecified duration
2020-04-05 15:53:24	238	1	7	7	7	7	1	7	7	7	7	7	7	7	7	1	7	1	1	7	7	7	7	7	7	7	1	1	1	1	1	7	7	7	7	7	1	7	first-degree certificate	Female	48	Urban	unspecified duration
2020-04-06 07:28:40	269	1	7	7	7	7	5	7	7	7	7	7	7	7	6	6	1	1	1	4	7	7	7	7	7	7	1	1	1	1	1	1	7	7	7	7	1	1	first-degree certificate	Female	57	Urban	unspecified duration
2020-04-04 23:26:20	90	1	7	7	7	7	7	7	7	7	7	7	7	7	1	1	2	2	1	2	6	7	6	7	7	7	1	1	1	1	1	6	7	7	7	7	1	1	first-degree certificate	Female	38	Urban	unspecified duration
2020-04-04 19:42:27	54	1	7	7	7	7	5	7	7	7	7	7	7	7	1	1	1	1	1	1	6	7	7	5	7	7	1	1	1	1	1	1	7	7	7	7	1	1	first-degree certificate	Female	37	Urban	unspecified duration
2020-04-09 16:54:21	367	1	7	7	7	7	1	7	7	7	7	7	7	7	1	1	7	1	1	1	7	7	7	7	7	7	1	1	1	1	1	1	7	7	7	7	7	7	first-degree certificate	Female	39	Urban	unspecified duration
2020-04-08 19:42:25	342	1	7	7	7	7	1	7	7	7	7	7	7	7	1	1	1	1	1	1	7	7	7	6	7	7	1	1	1	1	1	1	7	6	6	7	1	1	first-degree certificate	Female	36	Urban	unspecified duration
2020-04-08 21:25:37	352	1	7	7	5	6	3	7	7	7	7	7	7	7	2	2	7	7	1	3	7	7	7	5	7	7	1	1	1	1	5	2	7	5	7	7	1	1	first-degree certificate	Female	46	Urban	unspecified duration
2020-04-14 12:10:33	474	1	6	7	5	5	2	7	7	7	7	7	6	7	1	1	7	1	1	1	7	7	7	7	7	7	1	1	7	1	1	6	7	6	6	6	1	1	first-degree certificate	Female	48	Urban	unspecified duration
2020-04-12 15:21:50	435	1	6	6	7	7	1	6	7	6	7	6	7	7	1	1	4	1	2	2	7	6	7	7	7	7	1	1	2	2	1	4	6	7	7	7	2	1	first-degree certificate	Female	49	Urban	unspecified duration
2020-04-04 19:12:23	40	1	6	7	6	6	6	6	7	7	7	7	7	6	6	2	2	6	2	4	7	6	3	6	7	7	2	2	2	2	3	1	7	7	7	7	1	1	first-degree certificate	Female	52	Urban	unspecified duration
2020-04-05 02:41:29	114	1	6	6	6	6	5	6	7	7	7	7	7	7	5	1	1	1	1	4	6	6	7	6	7	6	1	1	1	1	1	1	7	5	6	7	1	1	first-degree certificate	Female	52	Urban	unspecified duration
2020-04-04 20:47:49	67	1	7	7	6	6	5	6	7	6	7	7	7	6	1	1	1	1	1	1	4	7	6	6	7	7	1	1	1	1	7	1	7	6	7	7	2	1	first-degree certificate	Female	42	Urban	unspecified duration
2020-04-10 21:40:29	395	1	7	7	6	7	2	3	7	7	7	7	7	7	1	1	1	1	1	1	7	7	7	7	7	7	1	1	1	1	1	1	7	7	7	7	2	1	first-degree certificate	Female	49	Urban	unspecified duration
2020-04-11 08:02:25	404	1	7	7	6	7	6	7	6	6	7	7	7	7	3	5	1	3	1	2	3	6	6	5	6	6	1	3	2	1	5	1	7	7	6	5	3	2	first-degree certificate	Female	44	Urban	unspecified duration
2020-04-12 21:39:11	440	1	6	6	5	5	2	6	6	7	7	7	7	6	1	1	1	1	1	2	6	6	7	7	6	7	1	2	1	1	2	1	6	7	7	7	1	1	first-degree certificate	Female	46	Urban	unspecified duration
2020-04-05 00:31:54	98	1	7	7	5	5	7	6	6	7	7	6	6	7	1	1	1	1	1	1	7	7	6	6	7	7	1	1	1	1	1	1	7	7	7	7	1	1	first-degree certificate	Female	53	Urban	unspecified duration
2020-04-14 13:33:10	497	1	7	7	6	6	1	7	7	6	6	7	7	6	1	6	2	1	1	1	7	7	7	7	7	7	1	1	1	1	6	1	7	6	6	7	1	1	first-degree certificate	Female	58	Urban	unspecified duration
2020-04-04 19:26:15	48	1	4	7	7	7	2	6	7	6	6	4	4	5	1	1	6	1	1	1	7	7	7	7	7	7	1	1	3	4	2	1	7	6	7	7	1	1	first-degree certificate	Female	62	Urban	unspecified duration
2020-04-14 12:48:29	493	1	7	7	6	6	2	6	7	7	6	7	7	7	1	1	4	1	2	1	5	7	4	7	7	7	1	1	1	7	1	1	7	7	7	7	1	1	first-degree certificate	Female	59	Urban	unspecified duration
2020-04-04 18:50:27	32	1	6	7	5	5	5	5	7	6	6	6	7	7	6	6	1	3	1	4	7	7	7	7	7	7	2	2	2	2	2	1	7	6	6	7	6	6	first-degree certificate	Female	47	Urban	unspecified duration
2020-04-14 20:06:22	511	1	4	5	7	6	5	7	5	6	6	6	6	7	3	2	1	6	1	2	7	7	7	7	7	7	6	2	2	1	1	1	7	6	6	6	1	1	first-degree certificate	Female	39	Urban	unspecified duration
2020-04-14 12:13:16	477	1	6	5	4	5	6	6	6	6	5	6	6	5	5	5	2	2	3	6	7	7	7	6	7	7	6	6	6	6	6	3	7	6	6	7	7	6	first-degree certificate	Female	59	Urban	unspecified duration
2020-04-05 13:47:27	223	1	6	6	5	5	2	5	5	6	5	4	6	6	1	1	1	1	1	1	5	7	5	6	6	5	1	1	1	1	1	1	6	5	5	6	1	1	first-degree certificate	Female	43	Urban	unspecified duration
2020-04-13 20:42:31	453	1	7	5	2	5	1	1	2	6	4	7	7	3	1	1	7	4	1	1	3	6	1	7	7	7	1	1	1	1	7	7	5	7	5	5	1	1	first-degree certificate	Female	40	Urban	unspecified duration
2020-04-14 12:30:55	488	1	6	7	4	6	2	7	4	4	3	7	6	7	2	1	3	1	1	1	7	7	7	5	7	7	2	6	1	1	3	1	7	7	7	7	1	1	first-degree certificate	Female	42	Urban	unspecified duration
2020-04-14 12:24:30	484	1	6	7	1	3	1	1	7	4	1	2	2	6	1	1	7	1	1	1	4	5	5	3	3	6	5	5	5	3	4	6	5	1	1	1	1	1	first-degree certificate	Female	40	Urban	unspecified duration
2020-04-14 12:35:28	492	1	6	7	1	3	1	1	7	4	1	2	2	6	1	1	7	1	1	1	4	5	5	3	3	6	5	5	5	3	4	6	5	1	1	1	1	1	first-degree certificate	Female	40	Urban	unspecified duration
2020-04-05 09:43:16	156	1	5	6	1	5	7	7	5	1	1	4	5	1	7	7	7	7	4	7	7	7	1	6	7	1	7	5	6	6	7	5	7	1	7	5	7	7	first-degree certificate	Female	43	Urban	unspecified duration
2020-04-10 19:06:01	388	1	7	5	3	6	6	7	1	7	1	7	7	7	1	1	4	1	1	1	7	7	7	7	7	7	5	1	4	4	1	1	1	1	1	7	1	1	first-degree certificate	Female	47	Urban	unspecified duration
2020-04-05 02:35:07	113	1	6	1	3	2	6	2	1	3	1	3	2	3	7	7	5	5	7	7	4	5	5	4	5	5	7	7	7	7	5	5	1	5	1	4	7	7	first-degree certificate	Female	45	Urban	unspecified duration
2020-04-08 22:52:11	357	1	7	7	7	7	4	7	7	6	7	7	7	7	4	1	1	1	1	1	7	7	7	7	7	7	6	1	1	6	1	1	7	7	7	7	1	1	first-degree certificate	Female	51	Urban	unspecified duration
2020-04-05 13:48:27	224	1	6	7	6	7	2	7	7	6	7	6	6	6	6	5	1	1	1	2	6	6	6	6	7	6	1	1	1	5	2	1	7	6	6	6	1	2	first-degree certificate	Female	45	Urban	unspecified duration
2020-04-04 18:22:22	12	1	6	7	6	7	2	7	7	6	7	6	7	6	2	1	1	1	1	2	7	7	7	7	7	7	2	2	2	2	2	1	7	7	7	7	2	2	first-degree certificate	Female	48	Urban	unspecified duration
2020-04-05 15:58:49	239	1	6	7	6	6	6	6	7	7	7	7	7	7	5	2	2	2	1	7	7	7	1	5	7	6	2	2	2	2	3	1	7	4	5	5	5	1	first-degree certificate	Female	54	Urban	unspecified duration
2020-04-05 10:29:53	173	1	6	7	6	7	2	6	7	7	7	7	7	7	2	2	2	2	2	2	2	6	6	6	7	6	2	2	2	2	2	2	6	6	5	7	2	2	first-degree certificate	Female	45	Urban	unspecified duration
2020-04-06 13:22:37	288	1	6	7	5	6	1	6	7	6	7	5	5	6	1	2	4	4	2	2	5	6	6	5	6	6	2	2	2	2	5	4	6	6	6	5	2	2	first-degree certificate	Female	51	Urban	unspecified duration
2020-04-06 00:13:09	264	1	5	6	5	5	6	6	7	6	7	5	6	6	2	1	1	2	1	2	6	6	5	4	6	6	1	5	5	1	2	1	7	7	7	7	2	2	first-degree certificate	Female	53	Urban	unspecified duration
2020-04-05 13:05:05	211	1	6	5	6	5	5	5	7	7	7	7	7	7	6	4	1	1	1	4	7	7	7	7	7	7	1	1	1	1	7	1	7	7	7	7	1	1	first-degree certificate	Female	59	Urban	unspecified duration
2020-04-06 22:24:21	298	1	7	4	7	7	1	4	7	7	7	7	5	5	1	5	2	2	2	2	1	3	4	4	2	5	2	2	2	2	2	1	6	6	6	5	7	2	first-degree certificate	Female	37	Urban	unspecified duration
2020-04-10 21:38:16	394	1	7	6	6	6	4	7	6	6	7	6	6	6	2	2	2	2	1	2	6	6	6	6	7	6	2	2	4	2	6	2	6	4	5	6	4	2	first-degree certificate	Female	60	Urban	unspecified duration
2020-04-10 12:11:08	384	1	7	7	6	6	3	6	7	7	6	7	6	6	1	1	4	1	1	2	6	7	6	7	5	6	1	1	4	1	1	6	6	5	7	6	2	1	first-degree certificate	Female	51	Urban	unspecified duration
2020-04-11 16:45:09	414	1	7	7	6	6	6	7	6	7	6	7	6	6	4	3	2	2	3	4	7	7	6	6	7	6	2	2	2	3	3	2	7	7	7	7	3	2	first-degree certificate	Female	61	Urban	unspecified duration
2020-04-12 23:23:41	442	1	6	5	5	6	4	7	6	7	6	7	7	7	1	3	6	1	1	1	6	6	7	7	7	7	1	1	2	2	6	7	6	5	5	6	1	1	first-degree certificate	Female	48	Urban	unspecified duration
2020-04-06 19:22:57	290	1	5	7	6	6	3	6	6	6	6	6	7	7	6	6	3	4	2	5	7	7	6	6	7	7	6	2	3	3	6	3	7	7	7	5	2	2	first-degree certificate	Female	55	Urban	unspecified duration
2020-04-14 14:15:44	500	1	7	6	6	6	5	6	6	6	6	6	6	6	2	2	4	2	2	4	6	6	6	6	6	7	2	1	2	3	2	4	6	6	6	6	2	2	first-degree certificate	Female	42	Urban	unspecified duration
2020-04-07 16:03:36	312	1	7	7	6	6	6	6	6	6	6	6	6	5	3	2	4	1	1	1	7	6	6	6	6	6	2	2	2	1	2	1	6	5	6	6	1	1	first-degree certificate	Female	48	Urban	unspecified duration
2020-04-06 14:48:50	289	1	3	5	5	5	6	6	6	6	6	6	6	6	7	7	7	7	6	7	7	6	6	6	6	7	7	7	7	6	6	6	6	6	6	6	6	6	first-degree certificate	Female	42	Urban	unspecified duration
2020-04-14 11:59:55	468	1	6	6	5	5	5	6	6	6	6	6	6	6	3	4	5	2	2	4	6	6	6	6	6	6	2	2	5	6	2	2	6	6	6	6	2	2	first-degree certificate	Female	40	Urban	unspecified duration
2020-04-13 20:19:37	451	1	6	7	7	6	3	5	6	7	6	6	6	6	1	1	1	1	1	1	7	6	5	6	7	6	1	1	1	1	1	1	7	6	6	7	1	1	first-degree certificate	Female	49	Urban	unspecified duration
2020-04-07 13:04:02	308	1	6	6	5	6	1	4	6	6	6	6	5	6	1	3	1	2	1	3	6	6	6	6	6	6	1	1	2	5	2	1	7	5	7	7	5	1	first-degree certificate	Female	47	Urban	unspecified duration
2020-04-05 09:57:03	160	1	5	7	5	6	1	7	5	7	6	7	7	7	1	2	4	3	4	1	7	7	5	4	7	6	1	4	4	3	5	4	7	7	7	7	4	2	first-degree certificate	Female	40	Urban	unspecified duration
2020-04-12 08:26:05	432	1	6	6	6	6	5	6	5	6	6	6	6	6	2	2	6	2	2	6	6	6	6	6	6	6	2	2	2	2	2	6	6	6	6	6	2	2	first-degree certificate	Female	54	Urban	unspecified duration
2020-04-14 12:31:53	490	1	7	6	3	3	3	5	4	5	6	5	4	5	2	3	6	5	2	2	6	6	6	6	6	6	3	3	5	4	5	6	4	4	4	6	5	5	first-degree certificate	Female	54	Urban	unspecified duration
2020-04-14 16:17:19	507	1	7	6	6	6	2	6	6	7	5	7	6	6	2	2	1	1	1	1	7	7	7	7	7	7	1	1	5	1	1	3	7	3	4	6	2	2	first-degree certificate	Female	43	Urban	unspecified duration
2020-04-05 09:05:17	142	1	5	6	5	5	4	6	6	6	5	6	6	5	5	5	6	5	5	6	6	6	6	6	6	6	5	5	5	5	4	4	5	5	5	6	5	5	first-degree certificate	Female	45	Urban	unspecified duration
2020-04-05 15:14:31	237	1	6	6	5	5	7	5	6	7	5	6	6	6	4	4	1	2	2	2	3	3	7	6	7	5	2	1	2	2	1	2	7	6	6	7	2	1	first-degree certificate	Female	48	Urban	unspecified duration
2020-04-05 10:27:59	171	1	6	4	4	6	4	5	5	6	5	6	6	6	4	3	3	3	3	4	6	6	6	6	6	6	4	3	5	4	3	3	6	6	6	6	3	3	first-degree certificate	Female	48	Urban	unspecified duration
2020-04-14 12:24:42	485	1	6	6	5	5	1	7	3	6	5	6	6	6	1	1	2	2	2	2	6	6	6	6	6	6	2	2	2	2	2	4	5	5	6	6	4	4	first-degree certificate	Female	44	Urban	unspecified duration
2020-04-14 16:31:35	508	1	6	7	5	6	5	7	5	5	4	3	6	5	5	5	4	3	5	6	7	7	6	6	6	6	5	5	5	5	6	6	6	5	6	6	5	6	first-degree certificate	Female	52	Urban	unspecified duration
2020-04-05 00:31:56	99	1	6	6	5	5	2	6	5	7	4	6	6	6	2	2	2	2	2	2	6	6	6	6	6	6	2	2	2	2	6	2	6	6	4	6	2	2	first-degree certificate	Female	45	Urban	unspecified duration
2020-04-05 07:43:07	124	1	6	3	6	6	5	5	5	5	4	4	5	6	6	3	1	3	4	5	6	5	6	6	6	6	3	3	3	3	3	1	6	5	5	5	3	3	first-degree certificate	Female	43	Urban	unspecified duration
2020-04-11 01:25:35	403	1	7	7	6	6	6	7	4	6	4	6	6	7	1	1	4	2	1	1	7	7	7	7	7	7	1	2	1	2	6	1	6	6	6	6	4	1	first-degree certificate	Female	59	Urban	unspecified duration
2020-04-04 18:10:37	9	1	7	6	6	6	2	6	2	6	4	6	6	6	3	3	2	2	2	5	6	6	6	7	7	6	5	4	4	4	5	2	6	5	5	6	5	3	first-degree certificate	Female	43	Urban	unspecified duration
2020-04-09 05:17:34	361	1	6	7	5	6	4	6	1	5	4	7	6	6	4	3	3	3	3	2	6	6	6	5	7	6	5	6	6	6	5	5	6	5	5	5	5	4	first-degree certificate	Female	49	Urban	unspecified duration
2020-04-12 12:15:47	434	1	6	6	5	5	4	5	5	5	3	3	5	5	3	5	7	6	5	4	5	5	2	5	7	5	5	6	6	4	7	7	6	5	5	5	5	6	first-degree certificate	Female	43	Urban	unspecified duration
2020-04-10 23:40:33	400	1	5	5	4	5	7	7	4	4	3	4	5	4	6	7	1	4	3	7	5	6	5	6	6	4	6	4	4	6	2	5	4	2	2	3	2	6	first-degree certificate	Female	50	Urban	unspecified duration
2020-04-05 01:41:43	109	1	6	6	4	4	5	6	3	7	3	7	6	6	5	1	1	1	1	7	7	7	7	6	7	6	1	1	1	1	4	1	1	2	4	4	2	1	first-degree certificate	Female	43	Urban	unspecified duration
2020-04-04 22:22:17	79	1	6	5	3	3	7	2	4	7	2	6	5	7	5	6	1	2	4	4	7	6	7	7	7	7	5	2	2	7	1	1	3	5	5	7	4	4	first-degree certificate	Female	38	Urban	unspecified duration
2020-04-04 21:25:34	71	1	5	4	1	3	6	2	4	7	2	7	3	5	4	5	4	5	4	4	6	4	3	2	7	5	2	2	6	1	1	4	7	3	5	5	4	6	first-degree certificate	Female	39	Urban	unspecified duration
2020-04-05 09:52:54	159	1	1	7	4	4	4	6	4	4	1	2	7	7	7	6	7	1	1	3	5	5	6	2	1	4	7	6	2	7	5	7	6	5	6	7	7	6	first-degree certificate	Female	43	Urban	unspecified duration
2020-04-05 11:13:00	183	1	5	6	3	4	1	6	1	5	1	5	4	6	5	6	4	4	2	6	6	6	6	6	6	7	7	7	7	2	7	2	6	5	6	7	3	7	first-degree certificate	Female	55	Urban	unspecified duration
2020-04-05 09:47:24	157	1	7	7	6	6	3	7	7	7	7	7	7	7	1	2	4	2	2	1	7	7	7	7	6	6	1	1	2	4	3	1	6	6	5	5	1	1	first-degree certificate	Female	36	Urban	unspecified duration
2020-04-13 21:21:53	456	1	6	7	7	7	7	6	7	6	7	7	7	7	7	4	5	3	2	2	6	7	7	6	7	7	1	2	2	5	4	2	7	7	7	7	5	4	first-degree certificate	Female	48	Urban	unspecified duration
2020-04-05 07:09:58	119	1	5	3	3	6	5	4	7	7	7	6	7	6	5	2	5	2	2	4	7	6	7	7	7	5	1	2	6	1	4	2	6	4	4	6	5	1	first-degree certificate	Female	39	Urban	unspecified duration
2020-04-05 06:55:37	118	1	6	6	3	4	2	5	7	6	6	6	6	5	5	1	1	3	1	5	5	7	6	7	7	7	2	1	2	1	3	1	7	5	6	7	3	2	first-degree certificate	Female	53	Urban	unspecified duration
2020-04-05 07:54:50	128	1	6	7	4	6	6	3	6	6	6	1	5	5	6	4	1	2	2	4	7	6	6	6	6	6	1	2	1	1	1	1	7	6	5	7	1	1	first-degree certificate	Female	57	Urban	unspecified duration
2020-04-04 18:32:26	19	1	6	7	7	6	5	6	5	6	6	5	5	6	2	2	4	2	1	4	5	5	5	3	6	5	2	1	1	1	1	1	5	6	6	6	1	1	first-degree certificate	Female	54	Urban	unspecified duration
2020-04-14 12:31:02	489	1	4	6	6	5	4	6	4	7	6	7	7	6	1	6	6	1	2	5	6	6	6	6	7	7	4	2	2	4	1	4	5	5	6	7	4	4	first-degree certificate	Female	45	Urban	unspecified duration
2020-04-05 10:18:07	168	1	5	3	2	4	4	5	3	6	6	6	7	7	5	5	1	4	2	7	7	7	7	7	7	7	6	3	6	6	6	2	5	5	5	5	2	3	first-degree certificate	Female	58	Urban	unspecified duration
2020-04-04 22:17:11	77	1	4	4	4	5	6	4	3	6	6	5	4	4	5	5	5	5	5	5	5	5	5	5	5	5	5	5	5	5	5	5	5	5	5	5	5	5	first-degree certificate	Female	43	Urban	unspecified duration
2020-04-11 12:14:39	408	1	6	7	6	5	7	6	6	6	5	6	6	7	5	5	6	5	5	6	6	6	5	6	7	6	5	5	6	5	5	2	6	6	6	6	4	5	first-degree certificate	Female	41	Urban	unspecified duration
2020-04-07 16:52:11	316	1	5	7	6	6	5	6	6	5	5	5	6	6	5	5	2	2	2	6	7	7	4	4	7	6	4	4	5	2	6	1	7	6	6	6	4	5	first-degree certificate	Female	49	Urban	unspecified duration
2020-04-12 22:42:27	441	1	6	6	5	5	7	6	5	7	5	7	5	6	5	2	7	3	2	6	6	6	5	6	5	6	2	2	5	2	3	7	6	3	5	6	3	2	first-degree certificate	Female	45	Urban	unspecified duration
2020-04-05 09:38:14	153	1	6	6	5	4	4	5	5	6	5	6	6	6	5	7	5	2	2	5	6	5	5	5	6	6	5	4	6	5	6	6	4	6	7	7	7	7	first-degree certificate	Female	41	Urban	unspecified duration
2020-04-14 12:12:26	476	1	5	6	4	4	3	5	5	6	5	5	5	5	4	5	3	2	1	1	6	5	6	5	6	5	3	5	5	5	5	5	4	4	4	5	5	5	first-degree certificate	Female	48	Urban	unspecified duration
2020-04-05 17:08:55	247	1	5	5	4	5	5	5	5	4	5	5	5	4	5	3	4	4	2	6	6	6	3	5	5	3	3	2	1	6	6	1	7	3	4	4	3	4	first-degree certificate	Female	43	Urban	unspecified duration
2020-04-05 12:00:07	197	1	3	3	3	3	6	5	5	6	5	5	5	5	6	6	6	7	6	6	6	5	6	5	5	6	6	5	4	7	7	5	6	5	7	7	6	6	first-degree certificate	Female	48	Urban	unspecified duration
2020-04-14 12:03:09	470	1	5	5	3	3	6	4	5	5	5	5	4	3	5	6	4	5	5	6	5	5	5	5	6	5	6	6	5	6	6	6	5	5	5	3	5	6	first-degree certificate	Female	39	Urban	unspecified duration
2020-04-04 18:49:49	31	1	5	5	5	5	6	3	5	3	5	5	5	5	6	5	6	5	5	6	5	5	5	5	5	5	6	5	6	6	6	6	6	4	6	6	6	6	first-degree certificate	Female	48	Urban	unspecified duration
2020-04-11 08:56:07	405	1	5	6	3	4	3	2	5	6	5	5	5	5	5	4	1	5	5	5	6	5	4	4	7	5	3	3	4	4	5	1	5	5	5	6	5	3	first-degree certificate	Female	39	Urban	unspecified duration
2020-04-14 12:19:20	481	1	5	6	4	5	4	5	4	5	5	5	5	5	4	5	4	4	4	4	5	4	4	5	5	5	4	4	4	5	5	4	5	5	5	5	5	5	first-degree certificate	Female	41	Urban	unspecified duration
2020-04-05 09:35:20	151	1	6	4	3	4	4	2	4	6	5	7	6	5	4	3	2	2	2	2	4	3	7	5	7	5	2	2	2	2	5	2	7	6	6	6	2	2	first-degree certificate	Female	35	Urban	unspecified duration
2020-04-05 15:05:53	236	1	6	6	5	5	2	6	6	4	4	4	4	5	4	4	6	3	2	5	5	6	1	2	2	4	4	3	4	4	3	6	4	3	3	3	3	3	first-degree certificate	Female	48	Urban	unspecified duration
2020-04-05 10:23:27	169	1	4	6	3	4	7	6	5	5	4	5	5	4	6	1	2	5	4	7	4	7	2	5	7	5	6	6	6	6	7	1	7	5	7	3	4	4	first-degree certificate	Female	52	Urban	unspecified duration
2020-04-14 12:18:41	480	1	7	5	5	7	6	5	5	6	4	6	6	6	5	6	6	1	1	1	7	6	6	6	6	6	2	2	2	4	4	6	6	6	6	6	4	4	first-degree certificate	Female	42	Urban	unspecified duration
2020-04-14 12:48:42	494	1	6	6	4	5	4	7	4	5	4	7	7	7	4	7	7	1	1	2	7	7	7	7	7	7	4	4	1	5	6	5	7	5	6	6	6	6	first-degree certificate	Female	40	Urban	unspecified duration
2020-04-04 20:40:55	65	1	6	4	4	4	6	6	4	6	4	4	7	6	5	6	4	3	4	6	6	6	3	6	7	6	4	4	6	5	5	5	6	4	6	6	2	4	first-degree certificate	Female	47	Urban	unspecified duration
2020-04-05 11:19:48	187	1	5	5	3	5	5	5	3	5	4	4	5	5	5	5	2	5	3	5	5	4	5	4	5	6	5	5	5	5	3	1	3	3	4	4	5	4	first-degree certificate	Female	43	Urban	unspecified duration
2020-04-04 21:07:41	70	1	5	5	2	3	6	6	2	4	4	5	5	5	6	2	2	5	2	6	6	6	6	5	6	6	5	1	6	2	5	5	2	4	6	6	3	3	first-degree certificate	Female	48	Urban	unspecified duration
2020-04-10 07:56:04	371	1	5	6	4	4	5	7	6	5	3	7	7	7	2	4	6	1	3	6	6	6	7	4	7	7	4	1	4	1	1	5	7	4	4	6	2	4	first-degree certificate	Female	46	Urban	unspecified duration
2020-04-04 19:45:43	55	1	6	6	6	5	5	6	5	6	3	6	6	6	6	5	6	5	4	6	6	6	4	6	7	6	3	3	4	3	6	6	6	4	5	5	4	4	first-degree certificate	Female	42	Urban	unspecified duration
2020-04-10 22:10:46	398	1	6	6	4	6	4	6	5	6	3	6	6	6	6	5	4	2	2	3	5	5	5	4	2	6	4	2	5	5	4	3	6	5	4	6	2	4	first-degree certificate	Female	39	Urban	unspecified duration
2020-04-13 10:03:24	446	1	5	6	5	6	7	5	5	6	3	5	6	5	6	6	6	5	5	5	6	6	5	6	7	5	5	7	6	7	7	4	5	3	5	6	6	6	first-degree certificate	Female	47	Urban	unspecified duration
2020-04-05 11:53:48	194	1	6	6	5	5	6	6	4	3	3	3	3	4	3	3	4	2	2	3	4	4	2	2	6	5	3	3	6	3	4	2	3	3	4	5	4	3	first-degree certificate	Female	48	Urban	unspecified duration
2020-04-14 10:55:49	462	1	5	5	4	4	5	4	4	5	3	5	4	5	4	6	6	6	7	7	6	5	5	5	6	5	7	5	6	7	5	6	6	6	6	6	6	7	first-degree certificate	Female	56	Urban	unspecified duration
2020-04-05 08:37:04	136	1	5	6	3	3	6	3	4	3	3	4	5	2	5	6	2	5	2	3	6	5	5	6	5	3	6	6	6	6	6	6	4	6	5	5	2	5	first-degree certificate	Female	46	Urban	unspecified duration
2020-04-05 05:41:56	117	1	5	3	3	3	4	5	3	5	3	4	6	5	2	3	1	2	4	6	5	5	2	4	6	6	3	4	4	4	6	3	5	7	7	7	6	6	first-degree certificate	Female	40	Urban	unspecified duration
2020-04-14 15:59:24	505	1	4	3	2	2	3	2	3	6	3	3	3	2	3	4	2	1	1	1	1	3	3	3	2	5	5	4	4	4	6	4	4	1	2	2	6	5	first-degree certificate	Female	44	Urban	unspecified duration
2020-04-04 18:09:06	5	1	5	6	3	5	6	4	4	5	2	5	4	5	6	6	3	5	5	6	5	4	4	5	5	5	7	5	5	6	6	6	5	3	3	5	4	6	first-degree certificate	Female	37	Urban	unspecified duration
2020-04-04 18:10:15	8	1	2	2	2	2	6	6	2	2	2	2	2	2	6	6	6	6	6	6	2	6	6	4	2	2	2	2	2	6	6	7	2	2	2	2	6	6	first-degree certificate	Female	47	Urban	unspecified duration
2020-04-09 02:12:07	360	1	5	3	6	5	6	4	2	6	2	7	6	6	7	4	5	6	5	6	6	6	6	7	7	7	4	6	4	6	4	4	6	7	7	6	7	7	first-degree certificate	Female	49	Urban	unspecified duration
2020-04-11 09:57:40	406	1	5	5	7	7	5	7	5	7	1	6	7	5	7	7	1	1	5	7	5	7	5	7	1	7	5	5	7	1	1	7	7	7	7	7	1	1	first-degree certificate	Female	51	Urban	unspecified duration
2020-04-05 22:13:18	257	1	5	4	4	5	6	7	1	7	1	7	6	6	7	6	7	2	4	7	5	6	5	5	7	6	6	6	6	7	5	6	1	1	2	6	4	3	first-degree certificate	Female	47	Urban	unspecified duration
2020-04-14 12:05:17	472	1	3	5	3	5	2	5	1	3	1	5	3	3	7	6	5	5	2	5	3	5	2	2	5	4	5	5	5	5	7	3	5	3	5	3	3	5	first-degree certificate	Female	50	Urban	unspecified duration
2020-04-05 01:08:56	104	1	5	6	5	5	5	4	5	5	6	6	5	5	5	4	2	3	2	4	6	6	7	6	6	6	4	5	4	3	4	2	5	3	5	6	3	4	first-degree certificate	Female	51	Urban	unspecified duration
2020-04-05 17:16:05	248	1	4	5	4	5	4	6	4	7	6	7	7	6	6	3	5	5	4	5	7	6	5	7	7	7	5	2	5	5	4	5	7	7	7	7	6	5	first-degree certificate	Female	32	Urban	unspecified duration
2020-04-05 12:16:51	200	1	6	5	5	3	7	5	6	6	5	5	7	6	6	6	5	4	6	6	6	6	6	6	7	6	5	5	5	5	4	3	5	2	2	4	4	2	first-degree certificate	Female	45	Urban	unspecified duration
2020-04-14 13:14:29	496	1	6	6	4	5	6	5	6	7	5	7	7	7	5	2	2	1	1	5	7	7	6	6	7	7	1	1	2	1	2	6	5	5	4	5	2	2	first-degree certificate	Female	42	Urban	unspecified duration
2020-04-05 02:35:04	112	1	6	5	4	5	5	5	6	6	5	5	6	7	5	5	1	5	4	4	4	6	5	5	6	5	5	5	5	2	3	2	6	7	7	6	2	2	first-degree certificate	Female	40	Urban	unspecified duration
2020-04-13 20:48:20	454	1	5	6	5	5	2	5	4	5	5	5	5	5	2	5	4	4	3	4	5	5	6	4	4	3	4	4	4	5	5	5	5	4	5	5	4	4	first-degree certificate	Female	45	Urban	unspecified duration
2020-04-05 20:16:55	254	1	4	6	4	4	2	2	4	5	5	5	5	5	3	2	6	4	4	4	5	5	5	4	5	6	3	5	3	4	4	4	6	5	5	6	4	4	first-degree certificate	Female	53	Urban	unspecified duration
2020-04-14 12:06:00	473	1	6	5	5	5	6	7	6	6	4	7	6	6	5	7	7	4	2	5	7	7	5	4	7	7	4	4	4	5	4	4	5	7	7	7	5	4	first-degree certificate	Female	48	Urban	unspecified duration
2020-04-05 08:48:27	139	1	5	6	6	6	2	6	6	5	4	5	5	3	5	2	4	2	3	2	5	6	1	7	7	4	3	4	4	7	7	4	6	5	6	6	1	5	first-degree certificate	Female	46	Urban	unspecified duration
2020-04-08 22:49:18	356	1	2	5	3	5	6	4	6	6	4	5	4	4	5	6	6	6	6	6	5	4	3	3	4	6	6	6	7	6	6	6	5	5	6	6	5	6	first-degree certificate	Female	45	Urban	unspecified duration
2020-04-04 18:06:45	3	1	6	6	5	5	6	5	5	6	4	5	5	6	4	4	4	4	4	4	5	5	4	4	6	6	4	4	4	4	4	4	5	4	4	5	4	4	first-degree certificate	Female	47	Urban	unspecified duration
2020-04-04 20:14:32	61	1	5	5	5	4	5	5	5	5	4	5	5	5	6	6	6	5	6	6	5	4	6	5	5	5	6	5	5	7	4	6	3	2	2	2	4	5	first-degree certificate	Female	58	Urban	unspecified duration
2020-04-08 23:07:31	358	1	6	7	5	7	1	6	4	7	4	7	6	6	1	3	2	5	1	1	6	6	4	6	7	6	1	1	2	1	5	6	6	6	6	7	1	1	first-degree certificate	Female	35	Urban	unspecified duration
2020-04-06 22:11:20	296	1	6	6	5	5	4	6	4	4	4	5	5	4	3	3	4	4	4	4	5	4	4	5	5	5	3	4	4	2	4	3	5	2	2	2	2	4	first-degree certificate	Female	42	Urban	unspecified duration
2020-04-05 02:32:05	111	1	4	5	4	5	6	6	4	5	4	4	4	3	3	5	1	2	2	6	6	6	6	6	6	5	5	6	4	4	2	4	5	6	6	6	4	4	first-degree certificate	Female	54	Urban	unspecified duration
2020-04-08 20:09:18	345	1	4	4	4	4	4	5	4	4	4	4	4	4	4	3	3	4	3	3	5	5	5	5	5	5	3	3	4	3	3	3	3	5	5	5	3	3	first-degree certificate	Female	51	Urban	unspecified duration
2020-04-05 12:21:30	202	1	5	6	3	5	6	4	4	7	4	5	6	5	5	6	4	4	4	5	7	6	6	5	7	6	5	4	4	5	5	4	6	4	4	6	3	2	first-degree certificate	Female	37	Urban	unspecified duration
2020-04-10 12:50:28	386	1	7	7	7	5	2	1	4	7	4	2	2	4	2	2	4	2	2	2	3	7	5	2	3	4	2	1	1	2	2	4	4	2	4	6	6	2	first-degree certificate	Female	57	Urban	unspecified duration
2020-04-04 19:57:22	59	1	7	6	4	5	3	5	3	4	4	4	4	4	3	2	2	2	2	5	6	7	5	5	7	6	3	2	2	4	5	3	4	5	4	5	2	2	first-degree certificate	Female	38	Urban	unspecified duration
2020-04-05 07:54:25	127	1	5	5	4	3	2	4	4	3	3	4	4	5	4	2	2	4	3	2	5	5	4	4	5	5	3	2	2	2	4	2	4	3	3	3	2	2	first-degree certificate	Female	55	Urban	unspecified duration
2020-04-05 11:03:20	182	1	5	6	3	6	6	4	4	6	3	5	5	6	5	7	2	2	2	3	5	6	6	6	5	6	3	2	2	2	4	2	7	6	6	6	1	1	first-degree certificate	Female	43	Urban	unspecified duration
2020-04-14 12:02:41	469	1	5	4	2	3	6	5	2	5	3	6	6	5	7	5	5	2	5	7	7	6	7	7	7	5	5	3	4	6	6	5	4	1	4	7	1	3	first-degree certificate	Female	45	Urban	unspecified duration
2020-04-08 21:39:05	354	1	6	7	6	6	5	3	2	6	3	5	5	4	4	3	2	2	1	5	5	4	1	4	4	4	6	6	6	5	4	7	6	4	4	4	2	4	first-degree certificate	Female	40	Urban	unspecified duration
2020-04-05 08:22:40	135	1	5	6	2	1	5	1	5	5	2	6	6	6	2	1	2	2	2	2	6	6	6	6	6	6	2	2	2	2	4	2	6	2	2	4	2	2	first-degree certificate	Female	45	Urban	unspecified duration
2020-04-05 15:04:43	234	1	4	5	2	2	7	4	3	7	2	7	5	6	7	6	1	5	7	7	6	2	7	6	6	6	7	6	7	7	6	4	5	6	6	6	6	6	first-degree certificate	Female	41	Urban	unspecified duration
2020-04-05 00:17:16	95	1	7	7	1	2	1	1	7	6	1	6	7	2	4	2	1	2	2	5	7	7	4	7	7	7	1	1	2	7	4	2	7	7	7	7	4	6	first-degree certificate	Female	36	Urban	unspecified duration
2020-04-11 00:45:49	401	1	6	7	6	7	5	7	7	5	6	6	5	6	5	5	2	6	6	5	7	6	2	4	4	6	5	6	4	2	3	2	7	3	6	6	6	5	first-degree certificate	Female	45	Urban	unspecified duration
2020-04-04 19:35:09	52	1	3	2	3	2	7	6	6	7	6	3	6	6	7	6	1	6	6	7	6	6	4	5	7	5	6	6	7	7	7	2	6	5	3	6	6	7	first-degree certificate	Female	49	Urban	unspecified duration
2020-04-07 17:36:53	319	1	5	6	5	4	6	5	6	3	6	5	5	5	5	4	6	5	2	5	6	6	2	6	6	6	6	5	5	5	2	3	4	6	6	6	2	6	first-degree certificate	Female	38	Urban	unspecified duration
2020-04-08 08:40:13	331	1	6	6	5	5	4	6	5	6	6	6	6	6	5	4	2	4	4	4	5	5	5	4	5	6	4	2	5	4	3	4	5	5	5	5	3	3	first-degree certificate	Female	52	Urban	unspecified duration
2020-04-05 13:03:34	209	1	6	5	5	6	7	5	6	7	5	6	5	5	6	6	2	6	3	6	6	5	6	6	6	6	6	5	6	6	6	2	4	2	5	6	4	6	first-degree certificate	Female	40	Urban	unspecified duration
2020-04-05 09:25:39	147	1	6	5	5	5	5	4	6	7	5	6	6	7	6	6	7	5	5	7	6	6	6	5	7	7	6	3	6	5	6	5	5	6	3	6	5	6	first-degree certificate	Female	42	Urban	unspecified duration
2020-04-13 13:35:32	448	1	5	6	5	5	6	5	5	6	5	6	6	5	6	3	4	3	2	4	5	4	6	6	6	6	3	1	3	4	4	3	4	5	5	5	4	4	first-degree certificate	Female	45	Urban	unspecified duration
2020-04-04 22:24:33	80	1	4	7	4	4	4	5	3	3	5	3	4	3	4	3	2	2	2	4	7	5	3	6	7	4	3	3	3	5	6	1	4	6	6	6	6	6	first-degree certificate	Female	37	Urban	unspecified duration
2020-04-08 10:05:09	332	1	4	5	5	5	6	5	5	1	4	4	4	4	5	5	4	3	3	5	6	5	4	4	6	4	4	6	5	4	6	3	6	5	5	6	4	6	first-degree certificate	Female	45	Urban	unspecified duration
2020-04-11 17:53:03	416	1	5	5	3	5	4	5	4	6	4	6	6	5	5	5	6	6	5	6	6	6	6	6	6	5	6	6	6	6	3	6	5	7	5	5	5	5	first-degree certificate	Female	58	Urban	unspecified duration
2020-04-08 20:39:48	346	1	7	6	4	4	2	4	3	6	4	6	6	6	2	2	4	3	4	5	3	2	6	6	6	6	2	2	2	2	2	6	2	2	5	2	3	2	first-degree certificate	Female	52	Urban	unspecified duration
2020-04-09 20:36:34	369	1	5	5	4	4	6	4	3	4	4	5	4	4	6	5	6	5	4	7	4	4	4	5	4	5	4	5	5	6	6	4	2	4	4	4	4	6	first-degree certificate	Female	52	Urban	unspecified duration
2020-04-05 00:46:16	101	1	3	5	2	2	3	5	4	6	3	5	3	5	5	6	1	4	5	5	5	4	1	1	5	2	5	5	4	5	5	1	3	5	2	3	5	5	first-degree certificate	Female	60	Urban	unspecified duration
2020-04-05 08:18:26	134	1	5	5	4	3	5	4	4	5	3	3	5	3	5	5	3	3	4	2	6	5	5	5	7	4	5	5	5	4	6	5	5	4	5	5	5	5	first-degree certificate	Female	40	Urban	unspecified duration
2020-04-04 22:20:49	78	1	3	3	3	3	7	5	3	3	3	3	3	3	3	6	2	6	6	7	6	4	5	4	5	5	7	7	7	6	6	6	4	4	4	5	6	6	first-degree certificate	Female	40	Urban	unspecified duration
2020-04-06 22:15:03	297	1	5	5	5	4	4	3	3	5	3	5	5	3	3	5	1	4	4	6	6	4	3	4	5	6	6	4	7	5	5	2	5	4	5	4	3	6	first-degree certificate	Female	51	Urban	unspecified duration
2020-04-08 19:18:30	337	1	4	4	2	2	2	4	3	6	2	5	5	5	4	4	1	3	1	3	3	4	4	4	4	4	2	2	3	3	2	3	3	3	3	4	3	3	first-degree certificate	Female	43	Urban	unspecified duration
2020-04-14 11:52:43	465	1	3	2	2	3	7	3	2	6	2	7	3	3	7	6	6	2	5	7	6	5	3	3	6	6	6	3	6	6	3	6	3	5	3	6	4	6	first-degree certificate	Female	40	Urban	unspecified duration
2020-04-08 14:54:29	335	1	2	2	2	2	1	2	2	1	2	1	1	2	1	1	2	2	1	1	2	2	1	1	2	2	2	3	3	3	3	2	3	2	2	2	1	2	first-degree certificate	Female	39	Urban	unspecified duration
2020-04-05 13:12:12	213	1	3	3	1	2	2	3	2	3	1	3	3	3	2	1	1	1	1	1	3	3	3	3	3	3	1	1	1	1	1	2	3	2	3	3	1	1	first-degree certificate	Female	39	Urban	unspecified duration
2020-04-04 18:26:54	14	1	3	1	2	2	3	3	1	2	1	5	2	2	6	6	1	5	4	5	5	4	1	3	6	6	6	5	6	5	5	3	2	5	4	5	2	5	first-degree certificate	Female	45	Urban	unspecified duration
2020-04-05 11:59:45	196	1	3	4	5	5	2	5	6	6	6	6	6	4	5	6	1	7	7	6	2	2	2	2	1	2	7	4	6	6	4	7	2	2	2	2	7	3	first-degree certificate	Female	52	Urban	unspecified duration
2020-04-11 16:36:41	413	1	5	5	5	5	4	5	2	7	6	6	6	6	3	4	1	1	1	1	7	7	7	7	5	7	1	1	1	1	1	2	7	5	5	7	1	1	first-degree certificate	Female	56	Urban	unspecified duration
2020-04-05 22:20:03	259	1	5	6	5	5	6	6	4	7	5	7	6	6	6	7	1	6	4	6	6	6	4	6	7	3	5	3	6	6	6	6	5	4	6	6	2	4	first-degree certificate	Female	56	Urban	unspecified duration
2020-04-08 21:15:07	351	1	5	5	4	4	5	7	2	5	5	3	4	5	6	6	4	3	3	6	6	6	5	3	6	5	3	4	5	3	6	1	4	5	5	5	4	5	first-degree certificate	Female	46	Urban	unspecified duration
2020-04-07 16:19:45	314	1	4	2	1	2	4	4	2	5	5	5	4	4	5	6	6	6	6	6	5	4	1	4	6	4	7	4	6	7	7	2	1	1	1	4	5	7	first-degree certificate	Female	40	Urban	unspecified duration
2020-04-10 21:27:12	391	1	2	4	4	3	4	6	4	6	4	7	7	6	5	5	4	2	2	7	5	6	4	4	7	6	5	2	4	5	4	4	6	4	6	6	5	5	first-degree certificate	Female	50	Urban	unspecified duration
2020-04-04 18:42:30	28	1	6	7	5	6	6	7	6	5	3	6	7	6	7	6	5	4	3	3	5	5	4	4	5	5	4	4	4	2	3	2	2	2	3	3	2	2	first-degree certificate	Female	48	Urban	unspecified duration
2020-04-08 21:52:34	355	1	6	5	4	4	6	4	5	5	3	3	4	4	6	6	7	4	3	5	6	5	3	7	7	5	7	5	5	6	6	5	4	5	4	7	5	6	first-degree certificate	Female	47	Urban	unspecified duration
2020-04-04 18:17:46	10	1	6	6	4	5	5	7	4	6	3	6	7	6	7	1	7	2	1	6	3	7	7	5	7	7	5	4	4	5	7	7	7	5	7	7	6	2	first-degree certificate	Female	46	Urban	unspecified duration
2020-04-08 20:44:44	347	1	3	3	3	3	2	3	3	3	3	3	3	3	2	2	4	1	1	2	3	3	3	3	3	3	1	1	2	1	1	2	3	3	3	3	1	1	first-degree certificate	Female	46	Urban	unspecified duration
2020-04-04 22:42:36	85	1	1	2	2	2	7	2	2	3	3	3	2	3	7	6	3	6	6	6	4	5	5	1	4	5	5	5	5	7	6	1	5	6	6	6	6	6	first-degree certificate	Female	47	Urban	unspecified duration
2020-04-04 19:14:02	41	1	2	4	2	3	4	1	1	7	3	5	4	6	4	6	6	4	4	5	5	6	3	4	5	7	4	3	4	4	2	7	4	4	4	4	4	6	first-degree certificate	Female	48	Urban	unspecified duration
2020-04-05 08:01:24	131	1	5	7	5	5	6	6	6	6	2	6	6	6	6	4	6	6	2	6	6	6	6	6	6	6	6	6	6	6	4	2	6	4	5	6	2	6	first-degree certificate	Female	43	Urban	unspecified duration
2020-04-05 13:26:06	216	1	5	5	4	5	7	4	4	4	2	5	5	4	6	6	6	6	6	7	6	5	3	3	3	5	7	7	7	7	7	7	4	4	5	5	4	6	first-degree certificate	Female	39	Urban	unspecified duration
2020-04-05 13:20:27	214	1	3	2	3	2	6	6	2	3	2	3	3	4	6	6	7	6	6	6	5	4	4	4	4	6	7	7	7	7	3	7	1	2	2	3	3	7	first-degree certificate	Female	38	Urban	unspecified duration
2020-04-13 10:54:02	447	1	3	5	3	2	5	4	2	2	2	3	2	2	6	6	6	6	6	6	6	3	2	4	3	3	5	5	5	4	4	6	5	3	5	4	5	5	first-degree certificate	Female	49	Urban	unspecified duration
2020-04-05 10:10:29	164	1	4	5	1	3	2	4	2	4	2	6	3	5	5	6	4	6	3	6	6	6	6	4	3	6	3	4	6	6	6	6	5	2	3	6	6	4	first-degree certificate	Female	50	Urban	unspecified duration
2020-04-04 22:41:32	84	1	2	3	4	3	4	3	2	2	2	2	2	2	6	6	6	6	6	6	6	2	2	2	2	2	6	6	6	6	6	1	2	2	3	3	6	6	first-degree certificate	Female	45	Urban	unspecified duration
2020-04-05 13:35:30	220	1	5	4	3	3	5	5	3	6	1	5	6	6	6	6	6	2	4	7	4	6	7	6	7	7	7	4	6	6	5	7	7	7	7	6	3	6	first-degree certificate	Female	42	Urban	unspecified duration
2020-04-06 08:51:39	271	1	3	5	2	3	5	3	3	3	1	3	2	2	6	6	1	2	6	6	5	3	2	2	3	3	2	2	6	3	2	1	1	2	2	2	5	5	first-degree certificate	Female	44	Urban	unspecified duration
2020-04-05 08:58:00	140	1	2	2	1	2	3	1	2	2	1	2	2	2	3	2	3	2	3	3	3	2	2	1	3	3	3	3	1	3	3	2	2	1	1	2	3	3	first-degree certificate	Female	40	Urban	unspecified duration
2020-04-14 05:47:55	459	1	5	1	1	3	6	7	1	7	1	7	7	7	7	7	1	4	1	7	7	6	7	7	7	7	7	1	7	1	2	7	6	6	1	7	7	7	first-degree certificate	Female	50	Urban	unspecified duration
2020-04-05 07:36:30	122	1	5	4	1	3	3	1	1	5	1	2	2	1	6	6	1	5	5	5	5	4	2	1	4	5	4	4	5	4	5	7	2	2	3	4	4	5	first-degree certificate	Female	43	Urban	unspecified duration
2020-04-04 19:29:35	50	1	6	6	6	6	6	2	7	7	7	7	7	7	7	7	1	6	6	6	6	6	6	6	6	6	6	6	6	4	4	1	6	6	6	6	6	6	first-degree certificate	Female	54	Urban	unspecified duration
2020-04-05 02:01:07	110	1	5	6	6	5	7	6	6	6	6	7	7	7	7	7	4	1	1	7	7	7	7	7	7	7	5	5	1	5	5	1	5	7	4	7	1	5	first-degree certificate	Female	39	Urban	unspecified duration
2020-04-05 16:26:13	243	1	5	5	4	5	6	5	4	5	4	6	5	5	6	6	2	3	3	4	4	3	3	3	4	3	2	4	4	4	4	2	2	3	3	3	2	3	first-degree certificate	Female	48	Urban	unspecified duration
2020-04-05 11:46:55	192	1	2	4	1	4	7	4	3	5	4	4	3	4	6	5	1	6	5	7	6	5	3	2	2	5	6	6	6	6	6	7	4	4	4	4	5	7	first-degree certificate	Female	46	Urban	unspecified duration
2020-04-05 13:23:07	215	1	2	3	1	2	7	2	4	2	3	2	3	3	7	6	1	3	4	7	6	4	3	2	6	7	5	4	6	6	6	1	6	6	5	5	6	6	first-degree certificate	Female	52	Urban	unspecified duration
2020-04-05 09:26:49	148	1	3	3	2	3	2	2	3	2	2	2	2	2	2	3	3	2	2	3	3	3	1	3	3	2	3	3	3	2	3	1	2	2	3	3	1	3	first-degree certificate	Female	45	Urban	unspecified duration
2020-04-11 00:52:50	402	1	4	3	2	3	4	2	2	4	2	3	3	2	6	7	1	6	6	6	4	3	2	2	3	2	6	4	7	6	3	7	2	6	2	2	5	6	first-degree certificate	Female	53	Urban	unspecified duration
2020-04-05 05:21:23	116	1	1	3	2	2	6	1	2	4	1	4	1	1	6	7	1	7	6	6	4	3	1	1	1	2	7	7	7	7	7	7	1	5	5	5	7	7	first-degree certificate	Female	38	Urban	unspecified duration
2020-04-12 19:47:34	438	1	1	2	2	2	7	1	1	1	1	2	2	2	1	7	7	7	7	7	7	1	1	2	7	1	1	7	7	7	7	7	1	1	2	7	7	7	first-degree certificate	Female	52	Urban	unspecified duration
2020-04-07 00:22:41	300	1	5	3	1	5	7	1	1	6	1	7	6	7	7	7	7	1	1	6	7	5	1	1	6	5	6	1	7	7	2	1	2	3	4	2	1	7	first-degree certificate	Female	39	Urban	unspecified duration
2020-04-17 09:51:31	720	2	7	7	7	7	1	7	7	7	7	7	7	7	1	1	1	1	1	3	7	7	7	7	7	7	1	1	3	1	1	1	7	7	7	7	1	1	first-degree certificate	Female	57	Urban	unspecified duration
2020-04-17 11:48:26	738	2	7	7	7	7	6	7	7	7	7	7	7	7	5	1	1	1	1	2	7	7	7	7	7	7	1	1	2	1	5	1	7	7	7	7	1	1	first-degree certificate	Female	47	Urban	unspecified duration
2020-04-25 18:21:05	1054	2	7	7	7	7	1	7	7	7	7	6	7	7	1	1	7	1	1	1	1	7	7	7	7	7	1	1	1	1	1	5	7	7	7	7	1	1	first-degree certificate	Female	51	Urban	unspecified duration
2020-04-16 21:32:44	646	2	7	7	7	7	6	7	7	6	7	6	7	7	2	1	1	1	1	6	7	7	7	7	7	7	2	2	1	7	2	1	7	7	5	7	5	6	first-degree certificate	Female	42	Urban	unspecified duration
2020-04-21 11:42:49	822	2	7	7	5	7	5	7	7	7	7	7	7	7	6	2	6	6	4	6	7	7	7	7	7	7	1	1	2	1	1	7	7	7	7	7	1	1	first-degree certificate	Female	58	Urban	unspecified duration
2020-04-24 22:46:26	968	2	5	5	5	5	1	7	7	7	7	7	7	7	1	1	7	1	7	1	7	7	7	7	7	7	1	1	1	1	1	7	7	7	7	7	1	1	first-degree certificate	Female	45	Urban	unspecified duration
2020-04-16 21:17:33	636	2	6	6	5	6	5	6	7	7	7	7	7	6	1	1	1	1	1	1	2	6	7	7	7	7	1	1	1	1	1	1	7	7	7	7	1	1	first-degree certificate	Female	52	Urban	unspecified duration
2020-04-16 14:24:55	538	2	7	7	5	5	1	6	7	7	7	7	6	7	1	1	2	3	1	1	7	7	7	7	7	7	1	1	1	1	1	2	7	7	7	7	1	1	first-degree certificate	Female	41	Urban	unspecified duration
2020-04-21 18:32:38	849	2	6	7	7	7	2	2	7	6	7	7	7	7	3	2	2	1	1	2	7	7	7	7	7	7	4	4	1	1	1	1	7	7	7	7	2	1	first-degree certificate	Female	43	Urban	unspecified duration
2020-04-17 10:52:18	729	2	6	7	5	7	4	7	7	6	6	6	7	6	1	1	7	1	4	4	7	7	7	6	6	6	1	1	1	1	1	4	6	4	7	7	1	1	first-degree certificate	Female	47	Urban	unspecified duration
2020-04-22 12:00:05	874	2	7	7	6	6	1	7	6	6	6	6	6	7	1	1	6	6	1	7	6	6	6	6	7	6	1	6	6	1	7	6	7	6	6	6	1	1	first-degree certificate	Female	56	Urban	unspecified duration
2020-04-16 18:52:56	551	2	2	6	5	4	7	6	6	6	6	6	5	5	4	5	4	4	5	7	7	6	7	4	5	6	5	5	6	7	6	1	6	6	5	6	7	7	first-degree certificate	Female	45	Urban	unspecified duration
2020-04-16 23:37:36	689	2	7	7	6	6	1	5	5	7	5	7	7	7	2	2	2	2	2	2	7	7	7	7	7	7	2	2	2	2	7	2	6	6	7	7	2	2	first-degree certificate	Female	37	Urban	unspecified duration
2020-04-17 09:37:08	713	2	3	4	2	2	1	2	6	7	4	4	1	1	1	6	7	3	2	7	7	6	1	4	1	5	7	6	7	7	7	1	6	6	7	7	5	5	first-degree certificate	Female	50	Urban	unspecified duration
2020-04-24 22:16:18	954	2	4	3	4	5	3	4	5	7	4	7	6	7	3	1	4	4	4	5	5	6	4	5	7	5	4	4	4	4	6	4	6	6	7	4	4	4	first-degree certificate	Female	36	Urban	unspecified duration
2020-04-16 20:27:17	601	2	6	5	3	4	5	6	4	7	4	7	6	6	5	2	5	4	4	3	7	6	1	7	7	7	4	2	4	6	3	3	4	3	4	6	3	2	first-degree certificate	Female	43	Urban	unspecified duration
2020-04-25 15:10:23	1030	2	5	3	4	3	5	2	4	3	3	4	3	4	4	4	5	5	4	4	4	4	4	5	3	4	5	5	4	6	7	5	6	4	5	4	5	5	first-degree certificate	Female	45	Urban	unspecified duration
2020-04-20 20:42:06	790	2	7	6	2	7	6	6	2	7	2	7	7	7	2	1	7	7	4	4	7	7	5	7	6	6	1	1	6	1	1	7	6	4	4	6	6	6	first-degree certificate	Female	60	Urban	unspecified duration
2020-04-25 09:09:42	989	2	5	1	2	3	6	6	6	6	1	6	6	6	6	6	6	6	6	6	6	6	6	6	6	6	7	7	6	7	7	7	7	7	7	7	5	7	first-degree certificate	Female	65	Urban	unspecified duration
2020-04-16 17:06:09	545	2	6	3	3	4	5	7	4	4	1	7	7	7	4	4	1	1	7	7	6	7	7	7	7	7	4	4	4	1	1	1	4	5	4	5	6	1	first-degree certificate	Female	53	Urban	unspecified duration
2020-04-22 11:43:20	870	2	4	5	2	3	3	3	2	1	1	2	4	3	2	5	1	4	3	3	3	1	1	1	7	4	7	7	7	5	6	7	4	7	5	4	7	7	first-degree certificate	Female	50	Urban	unspecified duration
2020-04-16 21:45:07	652	2	2	4	2	2	6	1	2	5	1	2	1	1	7	6	2	4	6	7	4	4	3	2	2	2	6	6	4	3	5	2	2	2	2	3	5	4	first-degree certificate	Female	44	Urban	unspecified duration
2020-04-21 11:07:57	813	2	2	1	1	1	7	1	1	1	1	1	1	1	7	1	2	1	1	1	1	2	2	1	7	6	7	7	7	7	7	5	5	1	1	2	7	7	first-degree certificate	Female	40	Urban	unspecified duration
2020-04-22 20:32:04	903	2	7	5	4	7	7	7	7	7	7	7	7	6	7	7	2	2	1	7	5	7	6	4	7	7	5	5	1	1	1	2	7	7	6	7	1	5	first-degree certificate	Female	45	Urban	unspecified duration
2020-04-24 21:46:25	943	2	6	7	6	6	2	6	7	6	7	6	6	6	1	2	5	6	1	6	6	6	5	6	6	5	1	1	2	2	2	6	6	3	6	6	2	2	first-degree certificate	Female	43	Urban	unspecified duration
2020-04-24 22:37:50	965	2	6	7	6	5	5	4	7	7	7	2	7	7	1	1	1	1	1	4	7	7	6	6	7	6	1	1	1	1	1	1	6	7	7	7	1	1	first-degree certificate	Female	43	Urban	unspecified duration
2020-04-21 11:00:02	809	2	2	4	5	5	2	6	6	7	7	7	7	7	1	1	7	1	2	4	7	7	7	7	6	7	1	1	3	2	2	6	7	7	7	7	2	1	first-degree certificate	Female	47	Urban	unspecified duration
2020-04-16 20:22:39	598	2	6	7	5	6	1	5	6	5	7	6	6	6	6	6	5	2	1	1	7	6	6	6	7	6	1	1	1	1	1	1	7	6	6	6	1	1	first-degree certificate	Female	48	Urban	unspecified duration
2020-04-16 11:00:39	528	2	5	7	5	5	1	6	5	7	7	7	7	7	1	5	5	1	1	1	7	7	5	7	7	7	1	1	1	1	1	1	7	5	6	6	1	1	first-degree certificate	Female	53	Urban	unspecified duration
2020-04-16 21:03:13	624	2	7	6	6	6	2	7	7	7	6	7	7	7	2	1	1	1	1	2	7	7	7	6	7	7	2	2	2	4	4	2	3	3	5	5	1	1	first-degree certificate	Female	46	Urban	unspecified duration
2020-04-16 19:20:04	568	2	7	7	5	6	3	7	7	7	6	6	7	7	3	3	1	1	1	2	7	7	7	6	7	7	2	2	2	2	2	1	7	6	5	7	5	2	first-degree certificate	Female	44	Urban	unspecified duration
2020-04-16 20:36:23	606	2	6	7	6	6	5	6	7	7	6	7	6	6	4	4	2	3	1	4	6	6	5	6	5	6	2	2	3	3	3	2	7	3	5	6	5	3	first-degree certificate	Female	43	Urban	unspecified duration
2020-04-17 13:19:24	746	2	6	7	6	6	6	6	7	6	6	7	6	6	3	3	6	5	2	2	7	6	5	6	7	7	2	2	2	2	2	1	6	5	6	7	2	2	first-degree certificate	Female	45	Urban	unspecified duration
2020-04-16 20:32:08	604	2	6	7	5	6	2	7	6	5	6	7	7	6	2	2	2	2	2	2	6	7	7	7	7	7	2	2	2	2	5	2	6	6	6	7	2	2	first-degree certificate	Female	50	Urban	unspecified duration
2020-04-21 14:35:02	839	2	7	7	6	6	5	6	6	7	6	7	6	6	1	4	4	2	1	4	6	6	6	5	6	6	4	2	4	4	2	5	7	6	6	6	1	1	first-degree certificate	Female	45	Urban	unspecified duration
2020-04-24 22:34:02	962	2	6	7	6	6	1	6	6	6	6	6	6	6	1	2	1	2	2	2	6	6	6	6	6	6	2	2	2	2	2	2	6	6	2	6	2	2	first-degree certificate	Female	60	Urban	unspecified duration
2020-04-16 19:28:38	572	2	7	6	6	6	2	6	6	6	6	6	6	6	2	2	4	2	2	1	7	6	6	6	6	6	2	2	2	3	3	4	7	6	6	6	3	2	first-degree certificate	Female	49	Urban	unspecified duration
2020-04-16 19:18:55	566	2	7	6	6	6	3	6	6	6	6	6	6	6	2	2	1	2	1	1	6	6	6	5	6	6	2	2	2	2	2	2	6	6	6	4	2	2	first-degree certificate	Female	50	Urban	unspecified duration
2020-04-16 20:08:21	590	2	6	6	5	5	6	6	6	6	6	6	6	6	5	1	1	5	2	6	6	6	6	6	6	6	1	1	1	2	2	1	6	6	6	6	1	1	first-degree certificate	Female	54	Urban	unspecified duration
2020-04-21 18:00:14	847	2	6	7	5	6	3	6	6	6	6	6	6	6	1	1	2	3	1	2	6	6	4	5	6	6	1	2	3	2	1	2	6	6	6	7	2	1	first-degree certificate	Female	54	Urban	unspecified duration
2020-04-16 22:23:35	670	2	5	6	5	5	3	5	6	6	6	6	6	7	4	2	1	2	2	4	5	5	4	4	7	7	2	5	2	3	4	1	7	6	7	6	2	2	first-degree certificate	Female	38	Urban	unspecified duration
2020-04-22 11:20:01	864	2	6	5	5	7	5	6	5	7	6	7	6	5	3	1	2	1	1	6	7	7	7	7	7	7	4	1	3	5	1	3	3	6	6	6	5	3	first-degree certificate	Female	36	Urban	unspecified duration
2020-04-17 12:21:48	743	2	6	6	6	5	5	3	5	5	6	6	6	6	5	7	5	5	2	5	7	6	5	6	6	6	5	3	3	7	6	2	6	6	6	6	5	5	first-degree certificate	Female	50	Urban	unspecified duration
2020-04-16 21:08:42	629	2	7	7	3	5	4	7	4	7	6	7	7	7	2	1	4	1	1	5	7	7	4	4	7	7	2	1	1	2	1	4	4	7	5	7	1	1	first-degree certificate	Female	53	Urban	unspecified duration
2020-04-16 22:46:55	678	2	5	4	4	4	7	4	4	7	6	6	6	6	6	6	6	6	6	6	6	6	6	6	6	6	6	6	6	6	6	6	6	6	6	6	6	6	first-degree certificate	Female	36	Urban	unspecified duration
2020-04-16 20:16:07	595	2	6	7	6	7	7	7	6	5	5	6	6	6	6	4	6	3	1	7	7	7	7	7	7	7	2	7	5	3	6	6	7	5	7	7	3	3	first-degree certificate	Female	38	Urban	unspecified duration
2020-04-16 21:37:57	648	2	6	7	6	7	7	7	6	5	5	6	6	6	6	4	6	3	1	7	7	7	7	7	7	7	2	7	5	3	6	6	7	5	7	7	3	3	first-degree certificate	Female	38	Urban	unspecified duration
2020-05-05 13:56:50	1098	2	6	7	4	6	5	6	6	7	5	5	5	5	2	5	6	2	2	2	6	6	6	6	7	7	4	4	4	1	5	1	7	6	7	7	1	1	first-degree certificate	Female	38	Urban	unspecified duration
2020-04-22 11:51:26	871	2	6	6	5	6	6	5	6	7	5	7	7	6	3	1	1	2	1	1	7	7	6	6	7	6	1	1	2	1	3	1	6	5	7	7	3	2	first-degree certificate	Female	42	Urban	unspecified duration
2020-04-17 11:12:47	733	2	7	7	5	6	1	5	6	7	5	7	7	6	1	1	4	2	1	1	5	6	7	6	7	6	1	1	1	1	2	7	6	5	5	6	1	1	first-degree certificate	Female	43	Urban	unspecified duration
2020-04-21 10:32:14	801	2	6	6	5	5	4	5	6	6	5	5	6	4	6	5	7	4	4	5	6	6	6	6	5	6	5	6	5	5	5	4	6	5	5	6	5	5	first-degree certificate	Female	51	Urban	unspecified duration
2020-04-17 16:46:36	760	2	6	6	5	6	5	5	6	6	5	5	5	5	4	3	3	2	2	4	5	5	5	3	6	6	4	2	2	2	6	2	4	5	6	6	2	3	first-degree certificate	Female	61	Urban	unspecified duration
2020-05-05 20:34:20	1108	2	6	6	5	6	6	6	5	6	5	5	6	5	2	2	3	2	1	1	7	6	6	6	7	6	2	2	3	2	4	2	7	6	6	6	2	2	first-degree certificate	Female	51	Urban	unspecified duration
2020-04-24 22:30:45	959	2	7	7	4	6	5	5	5	7	5	6	6	6	7	6	7	5	4	7	7	6	7	6	7	7	6	1	6	4	2	7	7	7	4	6	2	2	first-degree certificate	Female	42	Urban	unspecified duration
2020-04-25 14:19:34	1020	2	7	7	4	6	5	5	5	7	5	6	6	6	7	6	7	5	4	7	7	6	7	6	7	7	6	1	6	4	2	7	7	7	4	6	2	2	first-degree certificate	Female	42	Urban	unspecified duration
2020-04-17 10:55:56	731	2	5	6	4	5	5	5	5	6	5	6	7	7	1	2	4	4	2	2	7	7	4	6	7	7	2	2	2	1	2	1	6	6	6	7	2	2	first-degree certificate	Female	47	Urban	unspecified duration
2020-04-25 14:19:00	1019	2	6	7	6	5	2	7	4	7	5	5	6	6	4	1	1	3	2	4	6	6	5	5	7	6	2	2	2	2	1	2	6	3	6	6	2	2	first-degree certificate	Female	49	Urban	unspecified duration
2020-04-24 21:02:11	930	2	3	2	4	4	2	5	4	5	5	5	5	5	4	2	6	1	1	2	7	6	7	6	7	7	2	1	1	3	1	6	6	6	7	5	4	3	first-degree certificate	Female	33	Urban	unspecified duration
2020-04-21 11:05:55	812	2	6	6	5	6	2	7	6	6	4	5	5	5	1	2	7	1	1	1	4	5	4	4	7	7	2	2	2	1	1	5	6	7	6	6	1	2	first-degree certificate	Female	44	Urban	unspecified duration
2020-04-24 21:17:07	935	2	5	6	5	5	3	6	6	7	4	7	7	7	6	3	7	3	5	6	6	7	4	4	5	5	4	2	5	6	6	7	4	2	3	3	1	1	first-degree certificate	Female	43	Urban	unspecified duration
2020-04-16 17:09:23	546	2	6	5	5	5	7	6	5	6	4	6	6	6	7	6	7	4	4	6	6	6	6	5	7	7	6	6	6	6	5	7	5	5	6	6	6	5	first-degree certificate	Female	44	Urban	unspecified duration
2020-05-05 12:42:14	1097	2	3	6	5	6	6	5	5	6	4	7	5	6	6	6	6	3	3	6	6	6	6	6	6	6	3	5	5	5	3	4	6	5	6	6	3	3	first-degree certificate	Female	48	Urban	unspecified duration
2020-04-17 09:26:07	709	2	6	6	6	5	5	6	4	4	4	4	4	4	2	2	1	1	1	1	6	6	6	6	6	5	1	1	1	1	1	1	6	3	3	3	1	1	first-degree certificate	Female	56	Urban	unspecified duration
2020-04-15 19:21:12	520	2	6	6	4	5	1	6	4	6	4	6	6	5	2	2	6	2	2	2	6	6	6	6	6	6	2	2	4	2	2	2	6	6	6	6	2	2	first-degree certificate	Female	50	Urban	unspecified duration
2020-04-20 13:18:43	783	2	6	6	4	5	4	4	4	5	4	5	5	5	5	4	4	4	4	5	6	6	6	6	6	6	5	6	6	6	6	6	5	2	6	6	6	5	first-degree certificate	Female	42	Urban	unspecified duration
2020-04-16 22:47:18	679	2	5	2	6	2	4	1	3	4	4	6	6	3	4	4	5	4	5	5	4	1	6	7	6	6	7	6	7	7	7	7	1	6	1	2	7	6	first-degree certificate	Female	39	Urban	unspecified duration
2020-04-17 08:42:10	706	2	2	6	4	5	4	5	2	6	4	5	6	6	6	5	6	5	4	5	7	6	6	5	6	6	7	6	7	7	3	7	5	5	5	7	5	5	first-degree certificate	Female	43	Urban	unspecified duration
2020-04-16 20:39:50	609	2	6	6	5	5	5	5	5	6	3	6	6	7	4	6	6	4	1	6	6	6	5	5	6	6	5	5	5	6	7	7	4	6	6	6	6	6	first-degree certificate	Female	42	Urban	unspecified duration
2020-04-16 20:24:13	600	2	6	2	1	2	2	3	5	5	3	7	6	2	6	4	6	7	7	7	7	2	2	6	6	7	3	6	6	6	2	6	1	1	2	1	7	6	first-degree certificate	Female	34	Urban	unspecified duration
2020-04-16 19:12:40	561	2	5	4	3	3	3	4	4	6	3	4	5	2	4	5	4	5	5	5	6	5	5	3	5	4	5	5	3	5	5	4	5	5	5	4	6	4	first-degree certificate	Female	46	Urban	unspecified duration
2020-04-16 14:09:25	537	2	3	4	2	3	7	3	4	5	3	5	4	4	5	5	6	4	3	5	5	5	5	4	4	5	5	5	6	5	5	6	5	5	5	5	6	5	first-degree certificate	Female	55	Urban	unspecified duration
2020-05-05 18:37:38	1107	2	6	6	5	6	4	7	3	6	3	6	5	7	1	1	3	1	1	1	3	5	5	6	7	7	1	1	1	1	1	6	4	5	2	4	4	1	first-degree certificate	Female	40	Urban	unspecified duration
2020-05-02 16:54:24	1092	2	6	6	2	3	2	3	3	4	3	4	3	3	3	3	3	3	1	7	7	7	7	7	7	6	2	2	2	5	6	5	4	6	6	6	5	1	first-degree certificate	Female	52	Urban	unspecified duration
2020-04-25 14:37:03	1024	2	5	6	3	2	4	4	3	4	2	4	6	4	5	5	6	7	7	5	4	5	7	7	7	4	7	7	7	7	7	7	1	5	4	5	7	7	first-degree certificate	Female	60	Urban	unspecified duration
2020-04-21 11:14:52	814	2	5	7	4	5	1	5	2	7	2	7	7	7	2	1	2	3	3	3	7	7	7	7	7	7	2	2	2	2	2	3	7	6	6	6	2	2	first-degree certificate	Female	43	Urban	unspecified duration
2020-04-21 12:23:34	827	2	4	6	4	4	7	2	2	2	2	7	7	7	5	7	7	7	7	7	7	7	1	5	7	7	3	5	5	1	1	7	1	7	7	7	7	7	first-degree certificate	Female	52	Urban	unspecified duration
2020-04-21 10:41:35	806	2	4	5	2	1	3	3	2	5	1	2	3	3	1	4	2	6	6	6	5	6	6	6	7	6	6	6	5	5	6	6	6	7	6	6	2	6	first-degree certificate	Female	41	Urban	unspecified duration
2020-04-17 19:59:57	768	2	2	2	2	2	6	2	2	4	1	3	2	4	2	6	3	5	3	3	2	3	1	2	2	2	6	1	6	6	6	5	1	2	2	3	2	2	first-degree certificate	Female	51	Urban	unspecified duration
2020-04-17 09:35:51	712	2	6	7	7	6	1	7	7	6	7	6	6	6	1	1	1	1	1	1	6	7	7	7	7	7	1	5	2	2	3	2	7	7	7	7	2	2	first-degree certificate	Female	53	Urban	unspecified duration
2020-04-16 21:22:21	641	2	6	7	6	6	5	7	7	7	7	7	7	7	1	1	1	1	1	1	7	7	7	7	7	7	1	1	1	1	1	1	7	6	6	6	1	1	first-degree certificate	Female	47	Urban	unspecified duration
2020-04-22 10:44:24	860	2	5	6	5	5	5	6	6	7	7	7	6	6	6	5	2	6	3	2	6	6	6	6	6	7	2	2	2	2	2	1	6	6	6	6	2	4	first-degree certificate	Female	53	Urban	unspecified duration
2020-04-21 11:41:20	821	2	6	6	5	6	7	6	6	6	6	5	6	6	5	6	5	5	2	5	6	6	6	6	6	5	5	5	5	5	5	5	6	7	7	6	5	5	first-degree certificate	Female	46	Urban	unspecified duration
2020-04-17 17:51:38	763	2	6	6	5	5	5	6	6	6	6	6	6	5	5	3	1	2	2	5	5	5	6	6	6	6	3	2	2	3	5	2	6	5	6	5	2	2	first-degree certificate	Female	47	Urban	unspecified duration
2020-04-26 01:12:09	1065	2	6	7	5	6	7	5	6	7	6	6	6	6	4	1	2	1	1	2	4	7	7	6	7	7	1	6	5	1	5	7	7	5	7	6	2	6	first-degree certificate	Female	48	Urban	unspecified duration
2020-04-16 22:01:01	663	2	5	6	4	5	6	7	5	5	6	5	5	6	5	4	1	4	1	5	5	5	6	6	6	6	5	6	6	5	7	2	5	5	6	6	5	5	first-degree certificate	Female	59	Urban	unspecified duration
2020-04-16 19:33:55	575	2	7	6	5	5	5	6	5	6	6	6	5	6	2	3	5	5	4	4	7	6	6	6	7	7	2	2	3	2	2	4	6	6	6	7	2	2	first-degree certificate	Female	40	Urban	unspecified duration
2020-05-06 16:46:57	1112	2	6	6	5	6	6	5	5	6	6	5	5	5	6	6	5	2	2	7	6	6	6	5	7	6	5	5	4	5	5	4	6	6	6	6	5	5	first-degree certificate	Female	53	Urban	unspecified duration
2020-04-20 19:50:04	788	2	3	5	3	5	5	5	5	6	6	6	5	5	3	2	2	5	5	5	5	5	2	5	5	5	2	2	2	2	5	2	4	5	5	5	5	3	first-degree certificate	Female	35	Urban	unspecified duration
2020-04-15 23:17:01	522	2	7	1	1	1	1	2	7	7	5	5	5	5	7	5	3	3	5	5	5	4	4	4	4	4	4	4	4	4	5	5	5	5	5	5	5	7	first-degree certificate	Female	50	Urban	unspecified duration
2020-04-22 11:52:35	872	2	4	4	6	6	7	7	6	6	5	6	5	5	5	5	5	5	5	5	6	6	6	5	7	7	6	6	6	6	6	5	5	5	5	6	5	5	first-degree certificate	Female	49	Urban	unspecified duration
2020-04-17 14:15:40	752	2	5	7	5	5	6	7	6	6	5	5	5	5	4	4	3	5	4	3	6	5	6	6	7	6	5	4	6	4	3	3	6	5	6	6	3	3	first-degree certificate	Female	45	Urban	unspecified duration
2020-04-16 20:50:03	615	2	5	6	5	5	5	6	6	6	5	6	6	6	5	5	7	5	5	6	6	5	6	5	5	6	5	5	5	4	4	4	6	6	6	6	3	5	first-degree certificate	Female	50	Urban	unspecified duration
2020-04-21 11:26:13	818	2	6	6	5	5	5	6	6	6	5	6	5	5	5	5	7	6	5	5	6	6	6	5	6	6	5	5	5	6	6	4	6	5	6	6	4	5	first-degree certificate	Female	50	Urban	unspecified duration
2020-04-17 18:45:41	764	2	5	5	5	5	6	6	5	6	5	6	5	5	3	5	4	5	3	5	6	5	6	5	6	6	3	3	3	3	3	3	6	6	6	6	3	3	first-degree certificate	Female	42	Urban	unspecified duration
2020-04-24 23:09:12	976	2	5	6	5	5	5	6	5	5	5	5	5	5	5	1	1	1	2	2	5	5	6	6	5	5	2	2	3	2	5	2	2	6	2	6	3	4	first-degree certificate	Female	57	Urban	unspecified duration
2020-04-16 13:51:32	535	2	6	6	5	6	3	5	5	6	5	5	6	5	5	4	4	3	3	5	6	6	7	5	5	6	5	4	3	3	5	1	5	4	4	5	3	3	first-degree certificate	Female	51	Urban	unspecified duration
2020-04-20 16:26:17	784	2	6	6	5	5	5	5	5	6	5	6	6	5	5	1	2	1	1	1	6	5	5	4	5	4	1	1	1	2	5	2	6	5	6	6	2	3	first-degree certificate	Female	52	Urban	unspecified duration
2020-04-16 16:14:42	543	2	4	5	4	5	7	5	5	5	5	4	5	5	7	6	7	7	7	7	6	5	5	5	6	6	7	7	7	7	7	7	6	6	6	6	6	7	first-degree certificate	Female	55	Urban	unspecified duration
2020-04-16 20:57:14	621	2	5	5	3	5	5	3	5	5	5	6	6	6	6	3	6	5	3	5	6	6	6	6	6	6	5	5	6	5	5	6	6	5	6	6	5	5	first-degree certificate	Female	42	Urban	unspecified duration
2020-04-17 21:06:16	770	2	6	5	5	5	3	6	4	5	5	6	5	6	3	3	5	5	4	3	6	5	1	6	6	6	3	3	5	4	5	5	5	4	4	6	2	4	first-degree certificate	Female	46	Urban	unspecified duration
2020-04-16 21:49:18	655	2	6	7	6	7	6	6	5	6	4	6	7	7	2	2	6	1	1	5	7	7	6	6	7	7	1	2	1	2	3	5	6	7	5	6	3	2	first-degree certificate	Female	38	Urban	unspecified duration
2020-04-16 18:56:08	552	2	6	5	5	6	6	6	5	6	4	7	6	6	6	4	6	4	4	6	6	4	7	6	6	6	4	4	4	6	6	5	4	4	4	5	4	4	first-degree certificate	Female	32	Urban	unspecified duration
2020-04-16 19:01:11	556	2	6	5	5	5	5	5	5	6	4	5	4	6	3	5	5	1	1	1	6	6	6	5	6	5	5	4	2	4	4	2	4	5	5	5	3	3	first-degree certificate	Female	46	Urban	unspecified duration
2020-04-16 21:58:25	662	2	5	5	4	5	6	5	5	6	4	5	5	5	5	4	4	4	4	6	6	6	6	5	6	6	6	6	6	6	6	4	4	5	5	6	5	6	first-degree certificate	Female	49	Urban	unspecified duration
2020-04-17 14:11:59	749	2	4	5	4	4	5	5	5	5	4	5	5	5	4	5	5	5	4	5	5	4	4	4	4	3	4	4	4	5	5	5	5	5	5	5	5	4	first-degree certificate	Female	56	Urban	unspecified duration
2020-04-16 22:09:32	666	2	7	7	4	4	4	5	5	5	4	4	4	4	4	1	1	1	1	4	4	4	7	4	7	5	4	1	4	1	1	1	6	4	5	5	1	1	first-degree certificate	Female	35	Urban	unspecified duration
2020-04-21 10:39:44	804	2	5	6	4	4	5	5	3	5	4	5	3	4	5	4	5	5	5	5	5	5	5	4	5	5	4	5	5	5	4	4	3	4	5	5	5	5	first-degree certificate	Female	44	Urban	unspecified duration
2020-04-17 15:33:58	756	2	4	5	3	3	3	4	3	5	4	5	5	4	4	5	4	3	4	4	4	4	3	4	4	3	3	4	3	4	3	5	4	3	3	4	5	4	first-degree certificate	Female	54	Urban	unspecified duration
2020-04-16 20:04:23	587	2	5	5	3	5	4	3	2	6	4	2	3	3	3	5	6	6	3	4	5	5	5	5	7	6	6	2	2	6	6	7	7	7	7	7	6	5	first-degree certificate	Female	42	Urban	unspecified duration
2020-04-22 12:37:54	879	2	2	5	5	4	5	4	5	5	3	6	5	6	3	3	5	5	1	4	5	5	1	4	6	4	4	4	5	4	6	6	4	4	5	4	4	5	first-degree certificate	Female	47	Urban	unspecified duration
2020-04-23 09:54:02	909	2	3	5	5	5	5	3	5	5	3	5	5	5	5	4	6	6	6	5	6	6	6	6	4	6	5	5	6	6	6	6	6	6	6	6	6	5	first-degree certificate	Female	53	Urban	unspecified duration
2020-04-22 14:58:44	892	2	6	6	6	6	6	5	4	4	3	6	6	6	5	6	6	5	5	6	6	6	6	6	7	7	5	5	6	5	5	5	6	6	6	6	5	5	first-degree certificate	Female	59	Urban	unspecified duration
2020-04-25 16:10:55	1042	2	6	7	5	6	6	4	4	6	3	6	5	6	5	2	6	2	2	5	6	6	3	6	5	6	3	2	5	2	2	7	5	2	5	5	5	4	first-degree certificate	Female	60	Urban	unspecified duration
2020-04-16 21:38:59	650	2	5	5	3	3	3	4	4	3	3	3	4	4	4	4	3	3	2	3	4	4	2	4	4	5	4	5	4	4	4	4	6	6	6	6	3	3	first-degree certificate	Female	37	Urban	unspecified duration
2020-04-20 21:36:31	791	2	2	3	2	3	3	2	4	5	3	5	3	3	6	5	6	2	2	6	6	6	5	2	7	6	6	5	6	6	6	5	4	6	4	5	2	3	first-degree certificate	Female	55	Urban	unspecified duration
2020-04-16 19:56:35	585	2	5	5	2	2	2	5	3	3	3	3	5	3	7	3	1	2	5	5	5	5	4	2	7	3	7	7	7	7	7	1	5	5	5	5	5	5	first-degree certificate	Female	41	Urban	unspecified duration
2020-04-25 14:11:54	1018	2	5	2	3	3	7	3	3	7	3	6	5	2	7	7	7	5	3	7	3	3	3	2	3	5	6	5	5	6	6	7	5	4	5	5	6	6	first-degree certificate	Female	45	Urban	unspecified duration
2020-04-17 12:05:40	740	2	2	5	2	5	2	4	5	6	2	6	6	6	2	2	2	2	2	6	6	6	6	6	6	6	5	2	2	2	6	1	6	1	6	4	5	1	first-degree certificate	Female	47	Urban	unspecified duration
2020-04-16 21:32:42	645	2	3	2	4	3	5	5	4	2	2	3	1	3	3	2	4	4	4	2	4	2	1	2	1	1	3	4	4	5	5	3	3	3	4	4	6	6	first-degree certificate	Female	45	Urban	unspecified duration
2020-04-17 17:38:38	762	2	5	6	4	6	5	5	3	5	2	6	7	6	5	4	6	4	3	4	6	6	3	6	5	5	3	3	5	5	4	5	6	5	4	5	4	5	first-degree certificate	Female	42	Urban	unspecified duration
2020-04-21 10:59:53	808	2	6	6	3	5	2	4	2	6	2	4	2	3	2	1	1	6	4	3	6	6	6	2	6	5	2	2	5	2	6	1	5	6	6	7	2	6	first-degree certificate	Female	44	Urban	unspecified duration
2020-04-21 11:23:51	816	2	7	3	6	6	6	2	2	7	2	7	7	7	6	6	7	6	5	7	7	7	7	7	7	7	6	3	7	6	2	7	2	7	2	2	6	6	first-degree certificate	Female	38	Urban	unspecified duration
2020-04-16 20:15:04	593	2	3	2	3	4	5	4	1	3	2	4	3	5	6	2	5	4	6	4	6	3	2	2	3	6	5	2	3	2	6	5	2	3	3	2	3	3	first-degree certificate	Female	46	Urban	unspecified duration
2020-04-16 18:46:12	550	2	6	6	4	2	2	4	4	3	1	3	6	5	2	7	1	6	1	1	7	5	6	6	7	6	2	5	6	1	7	1	1	1	1	3	6	6	first-degree certificate	Female	45	Urban	unspecified duration
2020-04-17 10:38:54	726	2	5	5	4	4	3	6	2	3	1	2	2	6	5	7	5	4	6	6	5	4	2	2	2	4	7	5	6	7	6	6	3	2	2	5	6	4	first-degree certificate	Female	42	Urban	unspecified duration
2020-04-25 08:52:26	988	2	6	3	1	7	7	1	1	6	1	6	6	7	6	2	1	1	1	5	5	5	6	6	7	6	1	1	3	1	1	6	6	7	7	7	1	1	first-degree certificate	Female	36	Urban	unspecified duration
2020-04-16 19:02:40	557	2	5	7	4	7	6	5	7	6	7	6	6	6	6	4	4	4	3	7	7	7	6	6	6	4	5	5	5	5	5	7	6	6	5	7	6	5	first-degree certificate	Female	56	Urban	unspecified duration
2020-04-17 21:45:06	772	2	4	5	5	6	4	5	5	7	6	7	7	6	2	2	4	2	1	4	6	6	6	5	6	6	2	2	3	2	3	4	5	5	5	6	3	2	first-degree certificate	Female	62	Urban	unspecified duration
2020-05-06 20:19:45	1118	2	6	7	5	5	6	4	2	6	6	5	5	6	3	1	6	6	1	6	6	6	6	5	7	7	5	5	5	4	4	3	3	4	4	4	4	4	first-degree certificate	Female	44	Urban	unspecified duration
2020-04-22 17:58:33	900	2	5	7	4	5	7	5	7	7	5	6	6	5	7	7	4	4	4	7	7	7	1	5	7	7	7	5	5	7	7	1	6	3	3	4	4	6	first-degree certificate	Female	37	Urban	unspecified duration
2020-04-16 22:07:49	665	2	7	7	4	4	4	7	6	7	5	7	7	6	6	4	6	3	2	7	5	6	4	4	7	7	3	2	4	4	6	6	5	4	4	5	6	2	first-degree certificate	Female	55	Urban	unspecified duration
2020-04-16 19:14:36	564	2	5	5	5	5	6	6	6	5	5	5	5	4	5	5	5	5	4	3	6	6	5	4	5	5	4	4	4	4	5	3	6	5	5	5	3	4	first-degree certificate	Female	55	Urban	unspecified duration
2020-04-16 19:03:57	558	2	3	6	5	5	6	7	5	5	5	5	6	6	6	5	6	6	6	7	7	6	6	6	5	5	6	5	5	5	7	4	5	6	6	5	5	4	first-degree certificate	Female	47	Urban	unspecified duration
2020-04-16 23:09:44	685	2	1	7	3	5	6	6	5	5	5	4	3	4	7	3	1	5	2	5	6	6	1	3	7	5	5	5	3	5	7	1	4	3	6	6	6	7	first-degree certificate	Female	49	Urban	unspecified duration
2020-04-22 15:25:23	895	2	3	4	4	4	3	4	3	6	5	6	5	5	6	6	7	2	2	7	5	7	7	5	7	5	7	4	7	5	5	7	4	7	4	4	4	6	first-degree certificate	Female	47	Urban	unspecified duration
2020-04-17 07:52:02	701	2	3	4	4	4	6	5	6	5	4	5	5	5	5	7	5	5	4	6	6	5	4	5	5	4	5	5	5	5	7	5	4	4	4	5	6	6	first-degree certificate	Female	55	Urban	unspecified duration
2020-04-16 17:57:12	547	2	4	4	4	5	7	6	5	7	4	7	6	6	6	4	7	5	4	7	7	7	7	7	7	7	6	4	5	5	3	5	7	5	5	6	4	5	first-degree certificate	Female	60	Urban	unspecified duration
2020-04-21 10:30:12	800	2	5	6	5	5	4	5	5	5	4	5	5	5	4	4	7	4	2	3	5	5	1	4	3	5	6	6	6	3	6	2	6	7	7	7	1	6	first-degree certificate	Female	55	Urban	unspecified duration
2020-04-16 20:47:24	613	2	6	6	5	5	5	6	4	7	4	6	6	6	2	3	2	3	2	2	5	4	4	5	6	5	2	3	3	3	3	2	5	4	4	5	3	3	first-degree certificate	Female	59	Urban	unspecified duration
2020-04-17 15:39:59	757	2	6	6	5	6	5	6	4	6	4	6	7	6	4	3	6	5	2	3	6	5	5	6	7	6	6	2	4	6	3	2	5	4	5	5	3	2	first-degree certificate	Female	57	Urban	unspecified duration
2020-04-16 22:07:20	664	2	5	5	4	5	4	5	4	6	4	5	5	5	4	5	4	4	4	5	5	5	4	5	5	4	4	4	4	4	4	4	4	4	4	5	4	4	first-degree certificate	Female	50	Urban	unspecified duration
2020-04-24 22:26:36	956	2	4	4	4	5	6	5	4	4	4	4	4	4	4	4	4	4	4	4	4	4	4	4	4	4	4	4	4	4	4	4	4	4	4	4	4	4	first-degree certificate	Female	47	Urban	unspecified duration
2020-04-16 23:47:00	690	2	6	6	5	4	5	4	4	5	4	4	4	5	5	2	2	2	2	2	4	5	5	5	6	6	4	5	4	4	4	2	4	4	4	4	4	4	first-degree certificate	Female	53	Urban	unspecified duration
2020-04-25 13:44:56	1017	2	4	4	4	4	4	4	4	4	4	4	4	4	4	4	4	4	4	4	4	4	4	4	4	4	4	4	4	4	4	4	4	4	4	4	4	4	first-degree certificate	Female	41	Urban	unspecified duration
2020-04-25 17:15:30	1048	2	6	4	3	2	6	4	4	5	4	5	4	5	4	3	5	5	5	5	5	2	3	2	5	5	5	4	5	4	3	4	4	3	4	4	6	4	first-degree certificate	Female	47	Urban	unspecified duration
2020-04-21 11:22:17	815	2	5	5	3	4	6	4	4	5	4	5	4	5	5	4	5	4	5	5	6	5	5	6	5	5	5	5	5	4	4	4	4	3	5	5	5	5	first-degree certificate	Female	43	Urban	unspecified duration
2020-04-16 19:00:57	555	2	5	5	4	3	3	4	5	2	3	1	1	1	2	3	1	2	4	4	3	2	1	2	3	2	4	5	5	4	6	5	5	6	6	6	4	4	first-degree certificate	Female	59	Urban	unspecified duration
2020-04-25 10:42:03	1003	2	5	5	1	3	7	6	4	5	3	6	6	5	6	5	6	6	2	7	7	6	5	6	7	5	7	5	5	6	5	4	6	5	6	6	2	5	first-degree certificate	Female	37	Urban	unspecified duration
2020-05-05 11:58:39	1095	2	5	6	4	3	7	5	4	5	3	5	5	3	7	5	7	5	2	4	4	3	3	3	4	4	5	5	6	6	6	6	4	3	3	4	4	4	first-degree certificate	Female	37	Urban	unspecified duration
2020-04-27 13:14:50	1078	2	3	5	3	3	3	3	4	4	3	4	3	2	3	4	3	4	2	4	3	2	5	4	5	5	5	4	4	5	5	4	4	5	4	5	5	5	first-degree certificate	Female	58	Urban	unspecified duration
2020-04-24 22:04:48	951	2	4	5	3	3	5	4	1	5	3	4	4	5	5	5	6	5	4	7	6	3	3	4	3	3	5	5	5	7	5	6	3	4	5	5	6	6	first-degree certificate	Female	48	Urban	unspecified duration
2020-04-22 11:24:33	866	2	6	7	4	5	3	4	6	6	2	7	7	6	2	1	3	1	2	4	6	6	6	6	7	6	2	2	3	2	2	2	7	7	7	7	1	2	first-degree certificate	Female	47	Urban	unspecified duration
2020-04-24 23:28:43	977	2	5	4	2	4	6	3	4	4	2	5	4	4	5	5	4	4	3	5	5	4	2	2	4	2	5	5	4	5	5	4	3	2	3	4	5	5	first-degree certificate	Female	48	Urban	unspecified duration
2020-04-16 08:20:45	524	2	6	6	5	6	7	6	2	5	2	5	5	6	5	2	7	1	3	6	5	5	6	6	6	7	4	3	5	5	5	6	6	5	6	6	6	6	first-degree certificate	Female	42	Urban	unspecified duration
2020-04-16 19:53:09	584	2	3	6	3	2	7	5	2	2	2	2	2	2	6	2	2	2	2	3	7	6	6	2	7	6	6	6	6	2	6	2	6	6	6	6	6	6	first-degree certificate	Female	45	Urban	unspecified duration
2020-04-27 12:52:46	1077	2	4	2	2	2	7	3	2	2	2	3	3	3	6	5	1	4	3	5	3	4	4	5	6	4	4	4	5	6	6	7	5	4	4	4	4	6	first-degree certificate	Female	58	Urban	unspecified duration
2020-04-17 14:22:58	753	2	3	2	1	3	6	6	1	3	2	2	3	2	6	6	6	6	6	6	6	3	3	3	3	4	5	5	5	7	6	5	2	4	4	2	7	7	first-degree certificate	Female	49	Urban	unspecified duration
2020-04-25 18:08:32	1053	2	1	4	3	4	5	4	4	3	1	3	3	3	7	5	4	5	6	7	4	4	3	1	7	4	5	7	6	5	5	5	4	4	5	4	5	6	first-degree certificate	Female	58	Urban	unspecified duration
2020-05-05 15:05:57	1103	2	2	2	1	2	6	6	3	4	1	2	2	4	7	7	6	5	6	7	6	6	6	7	7	5	7	7	7	6	2	6	6	3	4	3	3	3	first-degree certificate	Female	43	Urban	unspecified duration
2020-04-24 23:00:43	972	2	5	3	2	3	3	6	2	6	1	6	6	6	1	1	2	2	4	3	6	6	6	5	6	5	2	2	5	5	2	4	3	4	2	4	4	2	first-degree certificate	Female	39	Urban	unspecified duration
2020-04-25 14:50:12	1027	2	3	4	2	3	4	2	2	2	1	3	2	4	2	4	6	4	3	6	6	3	2	5	1	2	5	5	6	5	6	6	4	2	2	5	4	3	first-degree certificate	Female	59	Urban	unspecified duration
2020-04-16 16:13:06	542	2	5	5	4	4	5	6	6	5	7	6	5	5	4	4	1	4	2	3	2	5	6	6	7	5	4	5	5	5	4	1	6	5	6	6	4	4	first-degree certificate	Female	50	Urban	unspecified duration
2020-04-24 22:57:27	970	2	6	6	6	6	1	6	7	6	6	6	6	6	1	1	2	2	2	1	4	4	4	4	4	4	2	2	2	2	2	2	4	3	3	3	2	2	first-degree certificate	Female	58	Urban	unspecified duration
2020-04-16 21:21:44	640	2	4	5	4	3	6	7	4	7	5	7	5	6	7	7	6	6	7	7	6	6	4	6	7	7	7	5	6	6	6	4	3	2	4	2	6	3	first-degree certificate	Female	48	Urban	unspecified duration
2020-04-16 23:29:05	687	2	6	4	5	2	5	5	3	6	5	6	6	6	2	7	1	1	1	5	6	6	6	6	7	6	5	1	2	5	1	1	3	2	2	7	4	1	first-degree certificate	Female	38	Urban	unspecified duration
2020-04-16 11:03:49	529	2	3	5	2	3	2	3	3	5	5	5	5	4	5	6	2	6	5	5	5	5	5	4	3	5	6	3	5	5	5	2	7	5	5	4	3	5	first-degree certificate	Female	45	Urban	unspecified duration
2020-04-16 21:18:05	637	2	4	4	4	4	5	6	4	6	4	6	6	6	4	4	5	3	4	5	6	6	5	4	7	5	4	3	5	5	5	6	5	4	4	5	5	4	first-degree certificate	Female	42	Urban	unspecified duration
2020-04-21 19:36:33	854	2	5	3	2	4	4	5	3	3	4	3	3	3	3	3	3	3	3	7	6	6	3	3	3	3	3	3	1	4	4	7	4	4	4	4	5	5	first-degree certificate	Female	44	Urban	unspecified duration
2020-04-25 08:18:42	987	2	6	3	3	3	1	3	3	6	4	4	3	3	1	5	6	6	6	3	6	3	3	3	3	5	2	6	7	3	5	7	3	3	3	5	3	4	first-degree certificate	Female	60	Urban	unspecified duration
2020-04-16 23:34:41	688	2	5	5	4	4	6	6	4	6	3	6	6	5	7	6	6	4	3	6	4	6	6	3	7	7	6	5	6	6	5	4	2	4	2	2	2	4	first-degree certificate	Female	36	Urban	unspecified duration
2020-04-21 11:33:05	819	2	6	5	4	4	3	4	4	6	3	5	6	6	2	3	2	3	2	3	6	5	3	3	7	4	5	3	5	5	5	3	6	5	5	5	4	5	first-degree certificate	Female	47	Urban	unspecified duration
2020-04-17 07:49:48	700	2	5	6	3	4	7	4	4	6	3	6	5	5	3	4	4	5	4	4	6	7	6	5	5	5	7	6	6	3	1	5	7	6	7	7	6	3	first-degree certificate	Female	43	Urban	unspecified duration
2020-04-21 10:05:05	796	2	5	4	3	4	3	4	4	5	3	4	4	3	4	4	3	4	4	4	3	3	4	4	3	3	4	4	4	4	4	4	3	4	4	3	4	4	first-degree certificate	Female	43	Urban	unspecified duration
2020-04-16 21:17:15	634	2	4	6	4	6	5	3	4	7	3	4	4	4	5	2	2	2	3	7	7	6	6	6	7	5	5	5	5	4	3	2	6	6	7	7	5	1	first-degree certificate	Female	46	Urban	unspecified duration
2020-04-25 17:18:52	1049	2	5	6	5	5	7	6	3	5	3	5	5	5	6	6	5	4	3	7	2	6	5	5	7	6	7	6	6	6	6	6	4	4	4	4	4	6	first-degree certificate	Female	50	Urban	unspecified duration
2020-04-16 16:09:50	541	2	5	4	3	5	5	4	3	5	3	5	5	5	4	4	5	3	3	5	5	5	5	5	5	5	3	3	3	5	5	5	4	3	5	4	3	3	first-degree certificate	Female	50	Urban	unspecified duration
2020-04-16 19:18:44	565	2	3	3	2	3	3	2	3	3	3	3	3	2	3	1	3	1	3	3	3	3	3	1	3	3	1	2	1	2	1	2	3	3	3	3	3	1	first-degree certificate	Female	35	Urban	unspecified duration
2020-04-21 17:56:50	845	2	5	5	6	6	5	6	2	1	3	3	3	3	3	4	4	4	2	5	5	5	4	4	2	4	4	3	3	2	2	3	4	6	6	6	5	5	first-degree certificate	Female	52	Urban	unspecified duration
2020-04-16 20:50:55	616	2	3	5	2	5	6	4	2	4	3	3	3	3	6	5	4	4	4	4	4	5	3	3	4	4	5	5	6	5	5	4	3	3	3	4	5	6	first-degree certificate	Female	45	Urban	unspecified duration
2020-04-22 12:28:36	877	2	7	5	4	4	6	6	4	4	2	4	4	6	6	7	6	4	6	7	7	7	7	7	7	7	7	7	7	7	6	3	3	3	2	4	4	4	first-degree certificate	Female	50	Urban	unspecified duration
2020-04-16 21:58:08	661	2	2	5	6	5	7	5	3	3	2	3	5	4	6	5	2	5	5	6	3	4	3	3	5	3	7	7	7	5	6	7	6	4	5	5	6	6	first-degree certificate	Female	50	Urban	unspecified duration
2020-04-22 12:47:27	881	2	3	3	1	2	2	3	3	3	2	3	3	3	1	1	2	1	1	3	3	2	3	3	3	3	1	1	1	1	1	2	1	1	1	2	1	1	first-degree certificate	Female	49	Urban	unspecified duration
2020-04-16 20:57:44	622	2	6	3	3	4	5	6	2	5	2	4	2	4	5	6	6	4	3	6	5	5	5	5	5	5	6	5	7	6	5	4	2	2	5	5	6	5	first-degree certificate	Female	49	Urban	unspecified duration
2020-04-16 19:22:41	569	2	4	3	3	4	5	2	2	3	1	3	3	3	3	2	7	2	2	7	7	6	6	6	6	7	6	1	1	1	3	5	5	5	5	5	3	3	first-degree certificate	Female	40	Urban	unspecified duration
2020-04-16 19:13:36	562	2	2	2	2	2	6	6	1	6	1	6	5	4	6	6	6	2	7	7	7	5	2	6	7	4	7	5	6	7	7	7	1	1	1	5	6	6	first-degree certificate	Female	51	Urban	unspecified duration
2020-04-17 11:20:43	736	2	6	3	1	2	5	2	1	6	1	6	3	5	5	5	6	3	6	6	5	5	3	1	3	5	5	5	6	5	5	7	2	1	1	2	5	4	first-degree certificate	Female	57	Urban	unspecified duration
2020-04-25 15:24:24	1037	2	6	5	2	3	2	2	5	5	5	2	2	5	2	2	3	5	2	6	6	6	2	6	6	6	2	7	7	6	2	6	1	6	6	6	2	2	first-degree certificate	Female	38	Urban	unspecified duration
2020-04-16 21:57:01	659	2	5	6	4	5	7	4	4	7	5	7	7	7	7	6	7	1	5	7	7	7	7	7	7	7	5	2	2	6	1	7	7	7	5	7	7	5	first-degree certificate	Female	38	Urban	unspecified duration
2020-04-16 13:40:42	533	2	5	5	3	5	5	5	4	6	4	5	4	5	3	2	3	2	2	2	6	5	5	5	5	5	3	2	2	2	2	5	4	4	4	5	2	2	first-degree certificate	Female	50	Urban	unspecified duration
2020-04-16 21:16:49	633	2	5	6	4	4	6	4	4	6	4	4	5	5	4	4	2	5	4	6	5	5	3	2	5	3	5	5	4	5	5	6	4	6	6	5	4	3	first-degree certificate	Female	58	Urban	unspecified duration
2020-04-20 19:55:21	789	2	7	1	4	2	5	2	2	6	4	7	6	6	6	7	1	6	5	6	4	4	4	4	7	4	4	1	7	2	2	7	5	2	2	2	6	1	first-degree certificate	Female	43	Urban	unspecified duration
2020-05-05 22:15:34	1110	2	5	7	5	5	6	6	4	6	3	5	6	5	7	6	2	2	5	6	6	5	5	5	6	6	6	2	6	6	6	3	4	3	3	3	4	5	first-degree certificate	Female	37	Urban	unspecified duration
2020-04-25 09:28:43	992	2	6	5	5	6	5	6	3	3	3	3	5	5	5	5	5	3	5	6	5	5	5	6	5	5	7	7	7	5	6	5	3	3	3	5	4	5	first-degree certificate	Female	40	Urban	unspecified duration
2020-04-24 23:35:43	979	2	3	2	2	3	3	2	2	4	3	4	4	3	4	4	4	3	3	3	4	3	2	3	3	3	3	3	4	3	2	3	2	2	2	3	2	2	first-degree certificate	Female	50	Urban	unspecified duration
2020-04-25 00:03:34	984	2	5	6	5	6	6	6	6	5	2	2	3	4	4	2	2	3	2	6	4	4	3	2	2	4	5	5	2	6	6	5	4	4	4	6	5	5	first-degree certificate	Female	61	Urban	unspecified duration
2020-04-17 09:46:13	716	2	5	5	3	3	6	2	6	5	2	2	2	2	6	3	4	4	2	6	6	6	3	2	6	6	6	3	6	6	6	5	5	3	5	5	5	6	first-degree certificate	Female	50	Urban	unspecified duration
2020-04-24 23:32:22	978	2	3	3	3	3	4	3	3	4	2	2	3	1	4	6	5	3	6	6	3	1	1	3	6	4	6	6	6	6	6	6	4	4	2	2	4	6	first-degree certificate	Female	45	Urban	unspecified duration
2020-04-24 23:40:29	980	2	2	1	2	2	7	3	3	3	2	3	3	2	7	7	7	5	7	7	4	4	2	2	3	3	7	7	7	7	7	7	2	2	2	3	7	7	first-degree certificate	Female	38	Urban	unspecified duration
2020-04-17 19:35:52	767	2	3	3	3	3	5	5	2	2	2	2	2	2	3	3	2	3	3	3	2	2	2	2	2	4	4	4	5	6	5	3	3	3	3	4	4	4	first-degree certificate	Female	63	Urban	unspecified duration
2020-04-23 05:41:26	908	2	2	4	6	5	2	4	2	3	2	3	6	3	3	3	2	3	6	7	2	3	2	2	6	3	7	1	3	7	6	1	2	4	4	2	6	6	first-degree certificate	Female	54	Urban	unspecified duration
2020-04-16 20:15:53	594	2	5	5	5	6	6	4	2	5	2	6	5	6	5	5	7	2	3	7	6	6	7	7	7	7	3	5	4	1	6	7	7	5	5	7	2	5	first-degree certificate	Female	45	Urban	unspecified duration
2020-04-21 10:17:23	798	2	3	3	3	2	2	2	2	1	2	1	1	1	2	1	1	2	2	1	2	1	2	1	2	1	1	2	2	1	1	2	1	2	2	2	2	1	first-degree certificate	Female	52	Urban	unspecified duration
2020-04-17 11:16:27	735	2	6	5	2	2	2	2	2	5	2	5	5	5	5	2	5	5	5	5	5	4	5	5	5	5	5	5	5	2	5	2	2	2	2	2	2	5	first-degree certificate	Female	57	Urban	unspecified duration
2020-04-25 15:03:55	1029	2	2	3	2	3	6	2	2	2	2	2	2	2	3	7	2	1	7	2	3	4	2	6	6	6	6	6	6	6	7	6	2	2	3	2	5	7	first-degree certificate	Female	48	Urban	unspecified duration
2020-04-21 13:58:24	836	2	2	2	1	2	7	2	1	4	2	7	7	4	7	6	6	2	7	7	7	5	1	3	7	7	7	4	7	5	7	3	6	6	6	7	6	7	first-degree certificate	Female	52	Urban	unspecified duration
2020-04-16 14:37:01	539	2	5	6	3	5	7	3	4	2	1	2	2	2	7	7	5	5	6	7	6	6	6	6	6	2	7	6	7	7	7	7	2	1	1	7	7	7	first-degree certificate	Female	52	Urban	unspecified duration
2020-04-25 10:56:20	1004	2	3	5	6	3	6	5	2	3	1	4	5	3	7	7	7	6	6	6	6	3	2	6	7	6	6	7	7	6	6	6	6	6	6	6	4	7	first-degree certificate	Female	55	Urban	unspecified duration
2020-04-16 21:50:22	656	2	3	5	5	6	6	4	1	6	1	3	4	5	7	7	3	6	3	7	7	5	5	5	7	5	6	7	4	7	6	3	6	1	4	6	4	7	first-degree certificate	Female	46	Urban	unspecified duration
2020-04-17 10:28:10	725	2	5	5	3	4	6	4	1	4	1	2	3	2	7	7	6	6	5	7	6	5	5	5	6	5	6	6	6	3	3	3	2	2	2	2	5	5	first-degree certificate	Female	52	Urban	unspecified duration
2020-04-25 15:14:03	1032	2	4	2	1	2	2	4	1	7	1	7	7	7	5	6	7	7	6	6	6	6	6	6	6	7	5	5	5	5	2	7	5	5	5	5	7	6	first-degree certificate	Female	52	Urban	unspecified duration
2020-04-22 11:41:21	868	2	4	2	2	2	4	2	1	5	1	4	4	3	3	2	2	2	2	4	4	3	5	4	2	4	2	2	2	2	3	2	2	2	2	4	3	4	first-degree certificate	Female	53	Urban	unspecified duration
2020-04-24 23:42:26	981	2	2	1	1	3	7	1	1	7	1	7	7	5	6	7	1	6	7	7	7	1	1	5	7	7	7	7	7	7	7	2	1	1	1	1	7	7	first-degree certificate	Female	30	Urban	unspecified duration
2020-04-21 14:03:40	837	2	5	6	3	5	6	4	5	3	5	3	6	5	6	5	1	6	1	7	5	6	6	6	6	6	6	6	6	6	6	1	6	3	3	6	2	6	first-degree certificate	Female	46	Urban	unspecified duration
2020-04-21 13:27:28	832	2	7	6	4	6	6	3	4	7	4	7	7	7	4	4	6	2	1	6	6	5	5	5	7	5	5	2	2	1	1	5	5	3	3	3	3	1	first-degree certificate	Female	45	Urban	unspecified duration
2020-04-25 10:19:03	1000	2	6	4	4	5	6	7	2	6	4	5	6	6	7	2	7	2	6	7	5	3	3	2	2	5	4	3	6	6	7	7	5	1	2	3	6	5	first-degree certificate	Female	52	Urban	unspecified duration
2020-04-25 15:15:15	1033	2	6	4	4	5	6	7	2	6	4	5	6	6	7	2	7	2	6	7	5	3	3	2	2	5	4	3	6	6	7	7	5	1	2	3	6	5	first-degree certificate	Female	52	Urban	unspecified duration
2020-04-26 17:51:21	1070	2	6	4	4	5	6	7	2	6	4	5	6	6	7	2	7	2	6	7	5	3	3	2	2	5	4	3	6	6	7	7	5	1	2	3	6	5	first-degree certificate	Female	52	Urban	unspecified duration
2020-04-27 18:51:53	1081	2	6	4	4	5	6	7	2	6	4	5	6	6	7	2	7	2	6	7	5	3	3	2	2	5	4	3	6	6	7	7	5	1	2	3	6	5	first-degree certificate	Female	52	Urban	unspecified duration
2020-04-16 21:28:07	643	2	4	1	1	3	3	5	5	5	3	7	5	5	7	7	3	7	7	7	4	4	4	3	3	7	7	6	6	1	6	7	1	1	1	2	7	7	first-degree certificate	Female	47	Urban	unspecified duration
2020-04-21 10:12:44	797	2	4	4	4	4	7	6	4	7	3	6	4	4	7	7	6	6	7	7	7	3	3	1	5	6	7	3	7	1	7	7	1	1	1	1	7	7	first-degree certificate	Female	42	Urban	unspecified duration
2020-04-25 18:55:13	1058	2	6	3	4	3	7	5	3	7	2	7	5	5	7	4	5	4	5	7	5	4	4	4	7	5	7	5	6	7	6	4	1	1	1	3	4	4	first-degree certificate	Female	38	Urban	unspecified duration
2020-04-25 09:48:50	994	2	2	4	2	5	5	6	2	5	2	4	4	3	5	6	6	4	5	7	2	2	2	5	6	3	6	6	7	7	2	6	4	6	4	5	6	6	first-degree certificate	Female	60	Urban	unspecified duration
2020-04-22 17:40:28	899	2	1	2	2	2	1	1	2	1	2	1	1	1	1	1	1	1	1	2	1	1	1	1	1	1	1	2	1	1	2	1	1	2	2	1	1	1	first-degree certificate	Female	42	Urban	unspecified duration
2020-04-16 21:49:11	654	2	2	7	2	4	6	2	6	1	1	1	3	3	7	6	6	6	7	7	6	7	7	6	2	2	6	7	7	6	6	7	1	7	5	3	7	7	first-degree certificate	Female	49	Urban	unspecified duration
2020-04-17 08:34:00	705	2	3	2	2	2	7	7	4	2	1	3	1	3	7	7	7	7	7	7	4	1	3	3	7	7	7	7	7	7	7	7	1	7	7	4	7	7	first-degree certificate	Female	44	Urban	unspecified duration
2020-04-16 19:50:43	583	2	3	2	1	2	7	1	4	4	1	4	3	1	7	7	7	7	6	7	6	5	6	1	7	4	7	7	7	7	7	7	5	4	3	4	7	7	first-degree certificate	Female	56	Urban	unspecified duration
2020-04-22 15:24:36	894	2	4	2	2	4	4	4	2	2	1	4	7	6	7	7	1	5	5	5	4	1	1	6	3	6	7	7	7	5	5	7	6	1	1	4	4	7	first-degree certificate	Female	60	Urban	unspecified duration
2020-04-25 20:55:26	1060	2	1	2	1	2	1	2	2	1	1	2	5	2	3	5	7	5	2	3	3	4	6	7	7	6	7	6	7	7	7	7	2	5	5	6	6	7	first-degree certificate	Female	55	Urban	unspecified duration
2020-04-16 20:59:58	623	2	7	4	1	2	7	7	1	3	1	1	1	4	7	7	1	7	7	7	7	1	1	1	3	1	7	7	7	7	1	5	2	5	5	5	7	7	first-degree certificate	Female	47	Urban	unspecified duration
2020-04-16 20:45:22	611	2	1	1	1	1	6	5	1	7	1	7	6	5	6	7	7	7	7	7	6	6	7	4	1	6	7	7	7	1	7	7	1	1	1	6	5	1	first-degree certificate	Female	37	Urban	unspecified duration
2020-04-17 10:59:14	732	2	2	1	2	2	1	4	1	5	1	1	2	1	1	1	1	1	1	1	1	1	1	1	1	1	1	1	1	1	1	1	1	1	1	4	1	1	first-degree certificate	Female	40	Urban	unspecified duration
2020-04-25 20:48:54	1059	2	2	2	1	2	7	2	1	5	1	2	3	1	3	5	7	7	7	7	7	3	2	2	3	3	3	3	7	4	4	7	1	1	1	1	4	4	first-degree certificate	Female	42	Urban	unspecified duration
2020-04-16 21:06:11	626	2	4	1	1	2	5	2	1	2	1	1	1	1	2	2	2	2	2	7	2	1	1	1	7	2	7	7	7	7	7	7	1	2	2	7	7	7	first-degree certificate	Female	54	Urban	unspecified duration
2020-04-16 21:06:28	627	2	4	1	1	2	5	2	1	2	1	1	1	1	2	2	2	2	2	7	2	1	1	1	7	2	7	7	7	7	7	7	1	2	2	7	7	7	first-degree certificate	Female	54	Urban	unspecified duration
2020-04-16 19:39:03	577	2	1	1	1	1	7	2	1	1	1	2	2	1	7	7	7	7	7	7	5	1	1	1	1	1	7	7	7	7	7	6	1	1	1	1	5	5	first-degree certificate	Female	50	Urban	unspecified duration
2020-04-16 22:47:35	680	2	2	6	2	1	7	1	1	5	1	3	1	3	7	6	1	4	5	7	4	6	2	7	7	5	7	7	7	7	5	1	4	5	1	3	7	6	first-degree certificate	Female	48	Urban	unspecified duration
2020-04-22 11:42:18	869	2	1	4	1	1	7	1	1	4	1	1	1	1	7	7	1	7	7	7	7	1	1	1	4	4	7	7	7	7	6	4	4	3	5	5	7	7	first-degree certificate	Female	50	Urban	unspecified duration
2020-04-25 15:31:20	1039	2	1	4	1	1	7	1	1	4	1	1	1	1	7	7	1	7	7	7	7	1	1	1	4	4	7	7	7	7	6	4	4	3	5	5	7	7	first-degree certificate	Female	50	Urban	unspecified duration
2020-04-15 10:49:52	516	2	1	1	1	1	5	1	1	3	1	2	1	1	7	6	1	7	6	7	2	1	1	1	1	1	7	7	7	7	7	1	1	1	1	1	6	1	first-degree certificate	Female	41	Urban	unspecified duration
2020-04-25 15:11:15	1031	2	1	1	1	1	1	1	1	1	1	1	1	1	7	7	7	7	6	7	5	1	2	2	1	1	7	6	7	7	7	4	1	1	1	1	1	7	first-degree certificate	Female	45	Urban	unspecified duration
2020-04-05 11:13:30	184	1	4	7	7	7	1	7	7	7	7	7	7	7	1	2	1	1	1	1	7	7	6	5	7	7	1	1	3	1	4	1	7	3	3	7	3	2	Ph.D. degree	Female	58	Urban	unspecified duration
2020-04-05 11:51:58	193	1	7	5	7	7	2	4	7	7	7	7	7	7	1	1	5	2	1	1	7	7	7	6	7	7	7	7	1	1	7	1	7	7	4	7	1	1	Ph.D. degree	Female	54	Urban	unspecified duration
2020-04-04 22:49:13	86	1	6	7	7	7	5	7	6	7	7	7	7	7	6	2	1	2	1	2	7	7	7	7	7	7	1	2	2	2	7	2	7	6	7	7	7	2	Ph.D. degree	Female	32	Urban	unspecified duration
2020-04-10 21:28:14	392	1	6	6	5	6	5	6	5	7	6	7	6	7	3	2	2	2	2	5	6	6	6	6	5	7	1	1	4	2	1	3	7	6	5	6	4	1	Ph.D. degree	Female	50	Urban	unspecified duration
2020-04-07 18:26:16	323	1	6	6	5	6	3	6	7	7	7	7	7	6	5	5	4	1	1	1	6	7	7	6	7	7	2	2	2	3	2	1	6	4	6	6	4	1	Ph.D. degree	Female	36	Urban	unspecified duration
2020-04-05 14:15:35	227	1	6	6	5	6	6	6	6	6	6	6	6	6	6	6	1	1	1	5	5	5	5	5	6	5	2	2	2	2	1	1	5	6	6	6	1	1	Ph.D. degree	Female	42	Urban	unspecified duration
2020-04-14 12:29:29	487	1	6	6	5	5	4	5	6	6	6	5	6	6	5	1	1	1	1	5	6	6	6	6	6	7	2	2	3	2	1	1	6	3	5	6	1	1	Ph.D. degree	Female	44	Urban	unspecified duration
2020-04-05 19:21:03	251	1	6	6	5	5	5	5	4	6	3	4	3	3	6	7	1	4	6	7	6	5	7	6	5	5	5	2	2	2	6	2	5	2	6	5	5	2	Ph.D. degree	Female	49	Urban	unspecified duration
2020-04-08 11:39:01	333	1	6	7	5	5	6	6	6	7	5	7	6	6	5	5	1	4	2	5	6	7	3	6	7	7	5	1	4	2	1	1	6	4	4	6	1	1	Ph.D. degree	Female	48	Urban	unspecified duration
2020-04-14 12:15:34	479	1	6	7	5	6	6	6	4	7	5	4	6	5	5	5	4	6	3	3	6	6	4	6	5	7	2	2	1	2	3	4	5	1	5	5	3	3	Ph.D. degree	Female	44	Urban	unspecified duration
2020-04-04 18:53:28	34	1	5	5	5	6	5	7	5	7	4	7	7	7	6	5	6	5	4	5	7	6	7	7	7	7	5	4	5	5	4	6	5	5	7	7	5	5	Ph.D. degree	Female	32	Urban	unspecified duration
2020-04-04 23:59:43	93	1	6	5	6	5	7	2	5	7	6	7	6	7	7	6	6	2	2	7	7	6	7	6	7	6	6	1	5	6	1	7	6	5	5	6	7	1	Ph.D. degree	Female	51	Urban	unspecified duration
2020-04-05 16:08:29	240	1	3	4	2	2	5	2	2	6	2	4	4	3	5	6	2	4	4	5	3	5	3	2	6	4	4	5	6	7	6	6	3	2	4	5	5	6	Ph.D. degree	Female	54	Urban	unspecified duration
2020-04-14 12:04:38	471	1	2	2	1	2	2	2	2	2	1	2	2	2	2	2	2	2	1	2	2	2	2	2	2	2	2	1	2	2	1	1	2	1	2	2	1	2	Ph.D. degree	Female	43	Urban	unspecified duration
2020-04-10 21:36:37	393	1	5	3	1	4	5	3	1	5	1	5	4	4	7	5	3	6	6	7	6	4	4	6	6	5	5	7	7	2	6	7	4	4	3	6	6	7	Ph.D. degree	Female	59	Urban	unspecified duration
2020-04-17 09:46:40	717	2	7	5	7	6	7	7	7	7	7	7	7	7	1	2	1	2	1	1	2	7	6	7	5	3	2	7	1	1	1	1	2	7	1	2	1	1	Ph.D. degree	Female	52	Urban	unspecified duration
2020-04-16 16:50:13	544	2	7	7	6	7	5	6	7	7	7	7	7	7	4	1	3	3	2	5	7	6	7	7	7	7	1	1	1	1	7	3	7	6	7	7	1	1	Ph.D. degree	Female	52	Urban	unspecified duration
2020-04-17 09:37:56	714	2	6	7	6	7	3	3	7	6	7	6	6	7	2	1	1	1	1	1	7	7	7	7	7	7	1	1	1	1	6	1	7	7	7	7	1	1	Ph.D. degree	Female	44	Urban	unspecified duration
2020-05-02 17:02:03	1093	2	6	7	7	6	4	6	6	7	7	7	7	7	1	1	7	1	1	2	7	6	7	7	7	7	1	1	1	1	1	5	6	7	6	7	1	1	Ph.D. degree	Female	41	Urban	unspecified duration
2020-04-20 12:20:11	781	2	7	7	6	7	1	6	6	7	6	7	7	6	1	1	1	1	1	1	7	7	7	7	7	7	1	1	1	1	1	1	7	7	7	7	1	1	Ph.D. degree	Female	44	Urban	unspecified duration
2020-04-20 18:59:48	786	2	6	6	5	6	3	6	4	6	5	6	6	6	4	2	2	1	1	2	5	6	6	7	6	6	1	2	2	2	1	1	6	6	5	6	4	2	Ph.D. degree	Female	60	Urban	unspecified duration
2020-04-16 00:37:26	523	2	6	6	5	6	2	7	6	7	6	6	7	6	5	2	5	1	2	7	7	7	6	7	7	7	5	2	3	5	3	1	6	5	6	6	3	3	Ph.D. degree	Female	30	Urban	unspecified duration
2020-04-21 09:18:19	793	2	5	6	5	5	5	6	2	3	5	5	5	5	5	5	5	3	3	5	5	6	6	6	6	6	5	5	5	5	6	5	6	5	6	6	5	5	Ph.D. degree	Female	45	Urban	unspecified duration
2020-04-25 18:24:03	1055	2	5	5	2	4	2	2	3	3	3	3	3	3	3	2	3	3	3	3	4	4	4	4	7	5	2	3	5	3	3	5	5	3	5	5	5	3	Ph.D. degree	Female	40	Urban	unspecified duration
2020-04-15 19:09:32	519	2	7	5	6	5	6	5	2	7	1	6	6	6	7	5	7	3	5	7	7	5	5	5	7	6	5	1	6	5	6	1	1	1	3	4	6	1	Ph.D. degree	Female	32	Urban	unspecified duration
2020-04-21 11:39:15	820	2	5	5	5	5	2	3	6	4	6	3	6	6	5	2	4	4	4	5	5	6	6	6	4	6	5	5	5	5	4	5	5	5	5	5	5	4	Ph.D. degree	Female	49	Urban	unspecified duration
2020-04-24 22:03:25	950	2	5	4	4	3	5	5	2	6	2	6	6	6	7	6	6	3	4	6	6	5	7	6	7	5	6	3	3	6	2	7	4	4	3	6	3	4	Ph.D. degree	Female	58	Urban	unspecified duration
2020-04-24 22:29:19	958	2	4	5	3	3	7	4	3	7	3	7	5	5	5	3	3	3	3	5	4	5	4	5	5	7	7	6	5	6	7	7	5	3	4	4	6	5	Ph.D. degree	Female	40	Urban	unspecified duration
2020-05-06 18:03:41	1114	2	6	6	5	5	2	3	5	5	5	5	4	6	2	2	2	2	2	2	6	6	6	6	5	6	3	3	3	2	2	2	6	6	6	6	4	4	Ph.D. degree	Female	56	Urban	unspecified duration
2020-04-25 00:08:04	985	2	3	3	1	2	6	2	2	5	4	6	4	3	6	6	5	5	7	7	5	4	2	3	4	5	6	6	7	6	7	7	4	4	4	4	6	6	Ph.D. degree	Female	56	Urban	unspecified duration
2020-04-21 13:01:31	830	2	5	6	5	5	6	6	3	5	2	6	4	6	6	6	1	2	3	5	6	4	5	6	3	5	6	5	6	5	7	1	4	4	1	7	6	4	Ph.D. degree	Female	35	Urban	unspecified duration
2020-04-17 14:13:29	750	2	1	2	1	2	1	1	2	2	2	2	2	2	2	2	2	2	2	2	2	2	2	2	2	2	2	2	2	2	2	2	2	2	2	2	2	2	Ph.D. degree	Female	58	Urban	unspecified duration
2020-04-16 21:44:36	651	2	5	4	1	1	7	1	1	5	1	1	2	2	6	5	4	5	6	6	6	5	1	4	5	4	6	6	5	6	6	4	1	1	1	1	5	6	Ph.D. degree	Female	49	Urban	unspecified duration
